# Supplementary material for: Genetic loci and prioritization of genes for kidney function decline derived from a meta-analysis of 62 longitudinal genome-wide association studies
Source: PubMed Central journal article supplement (PMC10034922; doi:10.1016/j.kint.2022.05.021), 2022-06-16
Supplement: NIHMS1841277-supplement-1.pdf [file NIHMS1841277-supplement-1.pdf]

## **SUPPLEMENTARY ONLINE MATERIAL**

### **Genetic loci and prioritized genes for kidney function decline from a meta-analysis of 62 longitudinal genome-wide association studies**

#### **Supplementary Methods**

#### **Supplementary Notes**

|                       |                                                                                                                                          |
|-----------------------|------------------------------------------------------------------------------------------------------------------------------------------|
| Supplementary Note S1 | Equivalence of DM-adjusted versus not DM-adjusted GWAS on eGFR-decline in the validation meta-analysis                                   |
| Supplementary Note S2 | Formula-based covariate adjustment using GWAS summary statistics                                                                         |
| Supplementary Note S3 | Validation of the formula-derived association for eGFR-decline adjusted for eGFR-baseline                                                |
| Supplementary Note S4 | Graphical illustration of the relationship between SNP-effects on eGFR-decline unadjusted and adjusted for eGFR-baseline                 |
| Supplementary Note S5 | Comparison of the signals for eGFR-decline unadjusted and adjusted for eGFR-baseline and cross-sectional eGFR for the 11 identified loci |
| Supplementary Note S6 | Age-dependency of SNP-effects and main age effect on eGFR                                                                                |
| Supplementary Note S7 | Narrow-sense heritability                                                                                                                |

#### **Supplementary Figures**

|                          |                                                                                                   |
|--------------------------|---------------------------------------------------------------------------------------------------|
| Supplementary Figure S1  | Meta-analysis workflow                                                                            |
| Supplementary Figure S2  | Study-specific median annual eGFR-decline versus sample size, follow-up time and median age       |
| Supplementary Figure S3  | No influence of alternative adjustments for age on eGFR-decline in UK Biobank                     |
| Supplementary Figure S4A | No influence from adjusting SNP-associations for eGFR-decline for diabetes mellitus (DM)          |
| Supplementary Figure S4B | Differences between SNP-association for eGFR-decline unadjusted versus adjusted for eGFR-baseline |
| Supplementary Figure S4C | Validation of formula-derived adjustment for eGFR-baseline in eGFR-decline associations (part 1). |
| Supplementary Figure S4D | Validation of formula-derived adjustment for eGFR-baseline in eGFR-decline associations (part 2)  |
| Supplementary Figure S5  | Region plots of loci identified for eGFR-decline unadjusted and adjusted for eGFR-baseline        |
| Supplementary Figure S6  | Age-dependency of eGFR and age-dependency of the variant effects on eGFR in UK Biobank            |

## **Supplementary Tables**

|                        |                                                                                                                                                                                 |
|------------------------|---------------------------------------------------------------------------------------------------------------------------------------------------------------------------------|
| Supplementary Table S1 | Description of participating studies: study design                                                                                                                              |
| Supplementary Table S2 | Description of participating studies: genotyping and imputation                                                                                                                 |
| Supplementary Table S3 | Description of participating studies: phenotype distribution                                                                                                                    |
| Supplementary Table S4 | The 12 identified variants for eGFR-decline were associated with other kidney phenotypes, but not with DM-status                                                                |
| Supplementary Table S5 | The 12 identified variants for eGFR-decline do not show heterogeneity between ancestries and FHS is not an influential study                                                    |
| Supplementary Table S6 | No influence by DM-adjustment versus no DM-adjustment or by model-based versus formula-based adjusting for baseline eGFR (BL) on the 12 variants' association with eGFR-decline |
| Supplementary Table S7 | Association of <i>APOL1</i> risk variants in African American and European CKDGen studies                                                                                       |

## **Extended acknowledgements, study funding information and author contributions**

## Supplementary Methods

### General approach for GWAS meta-analysis

An analysis plan and standardized scripts for phenotype generation and GWAS analyses were developed and implemented in all 61 CKDGen studies and UK Biobank. The 61 CKDGen studies consisted of 58 studies that were long-term partners of CKDGen (“old” CKDGen studies) and three studies that have joined CKDGen more recently allowing for more elaborate analyses (AugUR, HUNT and MGI; extended analysis plan, see below). Most studies were population-based and thus including individuals with specific kidney diseases according to the prevalence in the general population. Each study conducted GWAS analyses according to this pre-defined plan, separately by ancestry (if applicable). Ancestry was defined by genetic principal components or participants’ self-report. For each study, phenotypic information and genome-wide summary statistics per SNP were transferred to the meta-analysis centers.

Each study had been conducted according to the declaration of Helsinki. The studies have been approved by each local ethics committee. All participants in all studies provided written informed consent.

Meta-analyses were conducted, significant variants identified and respective locus regions selected. A GWAS across all available studies was shown to be advantageous over conducting a discovery followed by a replication stage on selected variants<sup>S1,S2</sup>. Therefore, rather than conducting a discovery GWAS in old CKDGen studies and a replication in recently joined CKDGen studies and UK Biobank, we included all studies into the GWAS meta-analysis on eGFR decline.

### Phenotype definition

In each contributing study, serum creatinine was measured at least two times, utilizing two measurements at largest time distance (study-specific details in **Supplementary Table S1**). When measurements were obtained by Jaffé assay (before 2009), creatinine measurements were calibrated (multiplying by 0.95<sup>S3</sup>). Serum creatinine measured at baseline and follow-up was used to estimate eGFR at baseline and follow-up, respectively, according to the Chronic Kidney Disease Epidemiology Collaboration (CKD-EPI) equation<sup>S4</sup>. This equation contains an age, sex, and ancestry term for a best fit of creatinine-based eGFR to measured GFR. At baseline and follow-up, eGFR was winsorized at 15 and 200 mL/min/1.73m<sup>2</sup>. Annual eGFR-decline was defined as “- (eGFR at follow-up - eGFR at baseline) / number of years of follow-up”; thus, eGFR-decline is positive when eGFR is lower at follow-up compared to baseline and comparable across studies with different follow-up length.

In each study, eGFR-decline was analyzed overall and restricted to individuals with CKD or DM at baseline. CKD at baseline was defined as eGFR < 60 mL/min/1.73m<sup>2</sup> at baseline. In CKDGen, DM at baseline was defined as fasting plasma glucose ≥ 126 mg/dl (7.0 mmol/L)

or diabetes therapy, or (fasting glucose unavailable) as non-fasting plasma glucose  $\geq 200$  mg/dl (11.0 mmol/L) or diabetes therapy, or (glucose unavailable) as self-reported diabetes. For UK Biobank, DM was defined as HbA1c  $\geq 48$  mmol/mol or diabetes therapy.

### **Study-specific generation of outcome variables according different adjustment models**

In each study, different models for the SNP-association with annual eGFR-decline as outcome were computed genome-wide: (i) adjusted for age, sex, and DM and applied to all individuals (“decline DM-adjusted”); (ii) adjusted for age and sex restricted to individuals with DM or CKD at baseline (“decline in DM”, “decline in CKD”). In the recently joined CKDGen studies and UK Biobank, an extended suite of models was applied: additional analyses were (iii) adjusted for age and sex using all individuals (“decline”), (vi) adjusted for age, sex and eGFR baseline using all individuals (eGFR baseline on log-scale,  $\ln(\text{eGFR})$ , “decline adjusted for baseline”). Further study-specific adjustments were applied (as applicable), including genetic principal components to account for population substructure.

These adjustments were implemented by generating residuals of annual eGFR-decline adjusted for the respective covariates and using these residuals as outcome in GWAS. This is a standard approach yielding comparable results to using the unadjusted phenotype as outcome in GWAS adjusting for the respective covariates. The utilized approach implies fewer covariates in GWAS being computationally more efficient. We standardized the creation of these outcome variables for GWAS by providing a centrally developed script, which also provided descriptive statistics on the study-specific phenotype.

### **Genotyping, imputation, and study-specific GWAS**

In each study, genotyping was conducted using Affymetrix and Illumina arrays (**Supplementary Table S2**). Imputation was performed using 1000 Genomes<sup>S5</sup> phase 1 or phase 3, the Haplotype Reference Consortium<sup>S6</sup> v1.1 or customized reference panels, annotating all variants on the GRCh build 37 reference build; imputed genotypes were coded as allelic dosages and imputation quality was provided as IMPUTE2<sup>S7</sup> info score, MACH/minimac<sup>S8</sup> RSQ or similar; quality control before and after imputation was conducted study-specifically (**Supplementary Table S2**).

In each study, GWAS analyses were conducted according to the centrally defined analysis plan. CKDGen studies included different ancestries (European, African American, East Asian, South Asian, and Hispanic) and contributed analyses ancestry-specific. Since most CKDGen studies individuals were European ancestry (94.90%), UK Biobank analyses focused on unrelated European ancestry individuals where two assessments of eGFR were available (n=15,442). For each GWAS, linear regression on the respective outcome variable was computed per SNP (modelled as allele dosages linearly) adjusted for principle

components and other study-specific covariates as applicable (**Supplementary Table S2**). This yielded three GWAS results for “old” and recently joined CKDGen studies (decline DM-adjusted, decline in DM, decline in CKD) and two further GWAS results for recently joined CKDGen studies and UK Biobank (decline, decline adjusted for baseline). Summary statistics were collected and quality controlled centrally with GWAtoolbox<sup>S9</sup>.

### **Study-specific summary statistics for decline adjusted for baseline**

As noted above, GWAS results on eGFR-decline adjusted for eGFR-baseline was not available in all studies. GWAS meta-analyses logistics in so many studies are highly complex; it is not trivial to “add” analyses applying other models. However, there is mathematical help to facilitate covariate adjustment post-hoc, i.e. by formula, based on GWAS summary statistics unadjusted for eGFR-baseline and GWAS summary statistics for eGFR-baseline and study-specific phenotype information<sup>S10</sup>. We demonstrate how this works (**Supplementary Note S1**) and that it works in this setting by validation studies: we compared formula-derived summary statistics for baseline-adjusted decline with model-computed baseline-adjusted decline in a subset of studies (the recently joined CKDGen studies, UK Biobank, selected “old” CKDGen studies). For eGFR-decline adjusted for baseline in the following, we used formula-derived summary statistics for the “old” CKDGen studies and computed summary statistics for the recently joined studies and UK Biobank.

### **Meta-analyses of GWAS summary statistics**

Before meta-analysis, we excluded, from each study file, multi-allelic variants, variants with a Minor Allele Count <10, and variants with an imputation quality <0.6 ( $R^2$  from minimac<sup>S8</sup> or info score from Impute<sup>S7</sup>). Per study, genomic control (GC) correction was applied when the GC-factor lambda was >1. We excluded a study for a specific analysis, when it contributed <100 individuals after quality control for this analysis.

Per model, we conducted a fixed-effects inverse-variance-weighted meta-analysis using metal<sup>S11</sup>. To account for the sequential recruitment of studies, we meta-analyzed per-variant summary statistics across “old” CKDGen studies (GC-corrected) and across recently joined CKDGen studies plus UK Biobank (GC-corrected), and then meta-analyzed these two (again GC-corrected, **Supplementary Figure S1**). After meta-analysis, only variants present in  $\geq 50\%$  of GWAS files and minor allele frequency  $\geq 1\%$  were retained for further analyses.

### **Identification of associated loci**

For our GWAS search, we selected genome-wide significant variants ( $P < 5.00 \times 10^{-8}$ ) in the meta-analyzed summary statistics and identified independent locus lead variants by an iterative approach, as applied previously<sup>S12</sup>: (i) from all genome-wide significant variants, we

selected the variant with the smallest P-value as the first lead variant and defined this variant's locus region as lead variant  $\pm 500\text{kb}$ , (ii) omitting this identified region, we selected the next variant with the smallest P-value, and (iii) repeated this procedure until no further variant with  $P\text{-value} < 5.00 \times 10^{-8}$  was observed. The *MHC* region (chr6:28.5-33.5MB) was considered a single locus. We checked for overlapping loci, but there were none.

For the candidate-based approach, we used the 265 lead variants previously reported for association with cross-sectional  $\ln(\text{eGFR})^{\text{S12}}$ , excluded the locus regions identified by the GWAS search, and, for the remaining candidate variants, judged significance at Bonferroni-corrected level.

For identified variants, we evaluated ancestry-related heterogeneity using MR-MEGA v.0.1.5 (Meta-Regression of MultiEthnic Genetic Association<sup>S13</sup>, including three principle components. We also conducted sensitivity analyses incorporating further models of covariate adjustment for identified eGFR-decline associations in a validation meta-analysis.

### **SNP-by-age interaction on cross-sectional eGFR**

We investigated the lead SNPs identified for (creatinine-based) eGFR-decline for SNP-by-age interaction on cross-sectional eGFR (based on creatinine or cystatin C, eGFR<sub>crea</sub>, eGFR<sub>cys</sub>). For this we used data that was independent of the SNP identification step: unrelated European ancestry UK Biobank individuals with one eGFR<sub>crea</sub> or eGFR<sub>cys</sub> assessment excluding the 15,442 individuals in the decline GWAS (yielding > 350,000 individuals).

For each SNP, we applied two linear regression models, one each for the outcome eGFR<sub>crea</sub> or eGFR<sub>cys</sub>, using the covariates age, sex, SNP, SNP-by-age interaction term, and four principal components (age centered at 50 years). We modelled (i) the main age effect on the outcome allowing for non-linear effects (to avoid spurious effects from non-linear main age effect when modelling age linearly), (ii) the main SNP effect linearly per allele dosage, and (iii) for the SNP-by-age interaction effect, the SNP-effect was modelled linearly per allele dosage and the age effect was allowed to vary non-linearly (smooth function, varying coefficient model<sup>S14</sup>, penalized thin-plate regression splines, mgcv-package in R<sup>S15</sup>). In a second analysis, the age effect in the SNP-by-age interaction was modelled linearly (i.e. linear effects for both SNP and age in the SNP-by-age term). We judged significance of the interaction at Bonferroni-corrected level.

### **Genetic effect sizes and GRS analysis for eGFR-decline**

We provide SNP-specific effect sizes on eGFR-decline in  $\text{mL}/\text{min}/1.73\text{m}^2$  per year over all individuals and focused on individuals with DM at baseline or CKD at baseline. We provide cumulative effects by GRS analysis in the population-based study HUNT (19-90 years old, European ancestry, up to 21 years of follow-up, mean of age-/sex-adjusted residuals for eGFR-

decline = 1.02 mL/min/1.73m<sup>2</sup>/year). To compute the GRS, we counted the number of the faster-decline allele across identified variants for each study participant, weighted by the effect size for eGFR-decline unadjusted for eGFR-baseline, then divided by the sum of weights and multiplied by the number of variants in the GRS. By this, the GRS is scaled from 0 to 2 times the number of variants, where one unit reflects one “average” unfavorable allele. We tested the quantitative GRS with eGFR-decline via linear regression adjusted for age and sex (unadjusted for eGFR-baseline) and we compared individuals with high versus low GRS ( $\geq 95^{\text{th}}$  versus  $\leq 5^{\text{th}}$  percentile,  $\geq 90^{\text{th}}$  versus  $\leq 10^{\text{th}}$  percentile derived from UK Biobank excluding individuals in the eGFR-decline GWAS). This was done over all individuals and restricted to individuals with DM at baseline or CKD at baseline.

We also computed a SNP's genetic effect size relative to the phenotype variance as  $\text{beta-estimates}^2 * \text{Var}(\text{SNP}) / \text{Var}(Y)$ , i.e.  $\text{beta-estimates}^2 * 2 * \text{MAF} * (1 - \text{MAF}) / (\text{standard deviation of } Y)^2$ , where MAF is the minor allele frequency of the respective variant. The joint effect of several variants was derived as the sum of the respective SNPs' effects. For this, again, we used the phenotype variance from HUNT: the standard deviation of age-/sex-adjusted residuals for eGFR-decline = 0.91 mL/min/1.73m<sup>2</sup> overall, 1.25 mL/min/1.73m<sup>2</sup> among individuals with DM, 1.39 mL/min/1.73m<sup>2</sup> with CKD, and for eGFR cross-sectional = 0.12 mL/min/1.73m<sup>2</sup> on the log-scale.

### **GRS analyses for ESKD and AKI**

We were interested in whether the GRS across the variants identified for eGFR-decline showed association with severe clinical endpoints, ESKD and AKI. For this, we used three case sets for ESKD and one case set for AKI as well as controls (eGFR > 60 mL/min/1.73m<sup>2</sup>) from population-based studies frequency-matched with regard to age-group and sex as described previously<sup>S16</sup>. Briefly, the three ESKD studies consisted of: (i) ESKD cases from unrelated European ancestry UK Biobank individuals (ICD10 code N18.0 or N18.5, i.e. need for dialysis) and matched UK Biobank controls (no record of any N18), excluding individuals in eGFR-decline GWAS; (ii) ESKD cases from GENDIAN and controls from KORA-F4; (iii) ESKD cases from the 4D-study<sup>S17</sup> and controls from KORA-F3. The study on AKI used AKI cases from UK Biobank (ICD10 code N17, “Acute Renal Failure”) and UK Biobank controls (no record of N17), excluding individuals in eGFR-decline GWAS. By this, the cases and controls across all four studies were independent of eGFR-decline GWAS, except the KORA-F3 and KORA-F4 controls to keep the previously designed and published case-control comparisons with GENDIAN and 4D.

For each of these four case-control studies, we retrieved the respective SNPs and computed a weighted GRS across identified variants for each individual as described above. We tested the quantitative GRS with ESKD or AKI. We applied a one-sided test, since we were

only interested in this association when the GRS increased the odds of ESKD or AKI. We also compared individuals with high versus low GRS ( $\geq 95^{\text{th}}$  GRS percentile,  $\leq 5^{\text{th}}$  percentile and  $\geq 90^{\text{th}}$  versus  $\leq 10^{\text{th}}$  GRS percentile, defined in UK Biobank individuals excluding individuals in eGFR-decline GWAS) and tested (one-sided) for increased odds of ESKD (meta-analysis across the three studies) or AKI. Associations are derived via logistic regression adjusted for matching variables age-groups and sex (for AKI additionally for the first two principal components).

### **Supplementary Note S1: Equivalence of DM-adjusted versus not DM-adjusted GWAS on eGFR-decline in the validation meta-analysis**

In the recently joined studies (HUNT, MGI, AugUR) and UK Biobank, we had more adjustment models computed for GWAS on eGFR-decline, to better understand similarities and differences. In these, we compared the GWAS summary statistics for eGFR-decline adjusted for DM-status to GWAS without adjustment for DM-status (i.e. GWAS on age- and sex-adjusted residuals and with and without adjustment for DM-status at baseline). In each study, we found precisely the same beta-estimates and standard errors (SE): (i) for the 265 SNPs identified previously for cross-sectional eGFR<sup>S12</sup>, for which we had a prior hypothesis that these contained the SNPs associated with eGFR-decline, as well as (ii) genome-wide where most of the SNP-associations are under the Null (**Supplementary Figure S4A**).

We added further “old” CKDGen studies to substantiate these findings in further studies and in an expanded validation meta-analysis (n=103,970). Again, we found DM-adjusted and not DM-adjusted beta-estimates and SEs to be precisely the same (**Supplementary Figure S4A**). Of note, this validation meta-analysis included general population studies and studies of specific scope: hospital-based (MGI), focused on individuals aged 70+ years (AugUR), or focused on individuals with chronic kidney disease (GCKD).

Given this equivalence, we did not distinguish any more between results DM-unadjusted or DM-adjusted.



## Supplementary Note S2: Formula-based covariate adjustment using GWAS summary statistics

Let's assume we have a quantitative phenotype Y and a covariate C. Let's further assume, we have GWAS summary statistics as beta-estimates and respective standard errors,  $\hat{\beta}_Y$  and  $\widehat{SE}_Y$  (beta-estimate and standard error) from linear regression models per genetic variant, i.e. from  $Y \sim \alpha + \beta_Y SNP$  (unadjusted model, omitting the indexing per variant). Let's assume we also have GWAS summary statistic  $\hat{\beta}_C$  and  $\widehat{SE}_C$  for the covariate C from the model  $C \sim \alpha + \beta_C SNP$  (covariate model via linear regression, C binary or quantitative). We can then "adjust" the summary statistics formula-based, i.e. we can derive the GWAS summary statistics  $\hat{\beta}_{YadjC}$  and  $\widehat{SE}_{YadjC}$  for the adjusted model,  $Y_{adjC} \sim \alpha + \beta_{YadjC} SNP + \gamma C$ , as described<sup>S18</sup> according to

$$\hat{\beta}_{YadjC} = \hat{\beta}_Y - \left( r_{YC} * \frac{sd_Y}{sd_C} \right) * \hat{\beta}_C \text{ and}$$

$$\widehat{SE}_{YadjC} = \sqrt{\widehat{SE}_Y^2 + \left( r_{YC} * \frac{sd_Y}{sd_C} \right)^2 * \widehat{SE}_C^2 - 2 * \left( r_{YZ} * \frac{sd_Y}{sd_C} \right) * corr(\hat{\beta}_Y, \hat{\beta}_C) * \widehat{SE}_Y * \widehat{SE}_C}.$$

Here, we assume that we know the standard deviation of C and Y,  $sd_C$  and  $sd_Y$ , respectively, the phenotypic correlation,  $r_{YC}$  (estimated as Pearson correlation coefficient between Y and C) and the genetic correlation between Y and C,  $corr(\hat{\beta}_Y, \hat{\beta}_C)$ , (using all genetic effects for Y and C genome-wide for estimation as reasonable proxy). When  $r_{YC}$  is zero, the adjusted model SNP-effects,  $\hat{\beta}_{YadjC}$ , are the same as the unadjusted model SNP-effects,  $\hat{\beta}_Y$ .

Alternatively, when we have GWAS summary statistics from the adjusted model,  $Y_{adjC} \sim \alpha + \beta_{YadjC} SNP + \gamma C$ , and the covariate model,  $C \sim \alpha + \beta_C SNP$ , we can "de-adjust" summary statistics formula-based, i.e. we can derive the GWAS summary statistics of the unadjusted model as

$$\hat{\beta}_Y = \hat{\beta}_{YadjC} + \left( r_{YC} * \frac{sd_Y}{sd_C} \right) * \hat{\beta}_C \text{ and}$$

$$\widehat{SE}_Y = \sqrt{\widehat{SE}_{YadjC}^2 + \left( r_{YC} * \frac{sd_Y}{sd_C} \right)^2 * \widehat{SE}_C^2 + 2 * \left( r_{YZ} * \frac{sd_Y}{sd_C} \right) * corr(\hat{\beta}_{YadjC}, \hat{\beta}_C) * \widehat{SE}_{YadjC} * \widehat{SE}_C}$$

We apply this on our example to summary statistics for annual eGFR-decline adjusted for eGFR-baseline (BL): given the beta-estimates for decline unadjusted for  $\ln(eGFR_{crea_{BL}})$  (in fact, residuals adjusted for age, sex),  $\hat{\beta}_{decline}$ , and the beta-estimates for  $\ln(eGFR_{crea_{BL}})$  (i.e. residuals adjusted for age and sex),  $\hat{\beta}_{BL}$ , we can "adjust" results for BL using the formula, i.e., derive the beta-estimates for decline adjusted for BL (residuals adjusted for age and sex),  $\hat{\beta}_{decline\_adj\_BL}$ , as

$$\hat{\beta}_{decline\_adj\_BL} = \hat{\beta}_{decline} - \left( r_{decline,BL} * \frac{sd_{decline}}{sd_{BL}} \right) * \hat{\beta}_{BL}.$$

Effect sizes here are given for the BL-lowering effect allele (which is usually the decline-increasing allele). The can also be written as

$$\frac{\hat{\beta}_{decline\_adj\_BL}}{sd_{decline}} = \frac{\hat{\beta}_{decline}}{sd_{decline}} + r_{decline,BL} * \left( -\frac{\hat{\beta}_{BL}}{sd_{BL}} \right).$$

This shows that the effect size of decline adjusted for BL standardized to the scale of standardized  $\hat{\beta}_Y$  effects (i.e. divided by  $sd_{decline}$ ) is the sum of (i) the (standardized) effect size of decline unadjusted (i.e. the vertical distance of this effect to the x-axis in a  $\hat{\beta}_Y/sd_Y$  versus  $\hat{\beta}_C/sd_C$  plane) and (ii) the vertical distance from the intersection point of the x-axis at  $\hat{\beta}_C/sd_C$  (i.e.  $< 0$  when the coding allele is the  $\hat{\beta}_C$ -lowering allele) to the phenotype correlation line,  $f(x) = r_{YC} * x$ , when the phenotype correlation is positive, like  $r_{YC}=0.33$  in UK Biobank, i.e. to the point  $(\hat{\beta}_C/sd_C, 0.33*\hat{\beta}_C/sd_C)$ . This also shows that  $\hat{\beta}_{decline\_adj\_BL} < \hat{\beta}_{decline}$ , since  $\hat{\beta}_C < 0$ , by definition.

### **Supplementary Note S3: Validation of the formula-derived association for eGFR-decline adjusted for eGFR-baseline**

In the recently joined studies and UK Biobank, we had more adjustment models computed for GWAS on eGFR-decline, to better understand similarities and differences. In these, we compared the summary statistics for eGFR-decline adjusted for eGFR-baseline (i.e. age- and sex-adjusted residuals and additional adjusted for  $\ln(\text{eGFR}_{\text{crea}} \text{ baseline})$ ) with eGFR-decline unadjusted for eGFR-baseline (i.e. age- and sex-adjusted residuals) and found substantial differences (**Supplementary Figure S4B**). Thus, the two models, unadjusted and adjusted for eGFR-decline were considered further.

Generally, in GWAS meta-analysis, the number of GWAS models computed needs to be as parsimonious as possible to remain feasible. In each of the “old” CKDGen studies, we had GWAS summary statistics for eGFR-decline unadjusted for eGFR-baseline, GWAS summary statistics for cross-sectional eGFR, and study-specific phenotypic information. We knew that this enabled us to do the adjustment by formula<sup>S10,S18</sup> (**Supplementary Note S1**). For the “old” CKDGen studies, we thus derived GWAS summary statistics for eGFR-decline adjusted for eGFR-baseline applying this formula.

While the formula was established previously<sup>S10</sup>, we validated that it worked in this setting using the recently joined CKDGen studies and UK Biobank, where we had the model “eGFR-decline adjusted for eGFR-baseline” computed: we also derived the SNP-associations for “eGFR-decline adjusted for eGFR-baseline” based on the formula for comparison in these studies for the purpose of validation. We found the formula to work very precisely per study: we observed equivalence in beta estimates and SEs when focused on the 265 SNPs identified previously for cross-sectional eGFR<sup>S12</sup>, for which we had a prior hypothesis that these contained the SNPs associated with eGFR-decline, as well as genome-wide, where most SNP-

associations were under the Null (**Supplementary Figure S4C**; e.g., in UK Biobank for the 265 variants: Pearson correlation coefficient  $r=1.00$  for betas and SEs; maximum difference in  $\beta=3.26 \times 10^{-2}$ , maximum differences in SEs  $=1.01 \times 10^{-3}$ ). We added further “old” CKDGen studies also to yield an expanded validation meta-analysis ( $n=103,970$ ). Again, we found the formula to work precisely in each study and in the expanded validation meta-analysis (**Supplementary Figure S4C**).

The formula is mathematically derived and works perfectly when GWAS summary statistics for baseline eGFR are available. For studies with GWAS on cross-sectional eGFR, the sample size for cross-sectional eGFR is typical a bit larger than the sample size for eGFR-baseline for longitudinal studies (i.e. restricting to individuals in the follow-up). We evaluated the impact of using cross-sectional eGFR summary statistics rather than baseline eGFR summary statistics in the formula in three “old” CKDGen studies at the hand of the Regensburg meta-analysis center. There was no difference in SEs for the 265 variants or genome-wide, a slight difference for beta estimates of the 265 variants, and a larger (random, not biased) difference in betas genome-wide (**Supplementary Figure S4D**). This difference in genome-wide SNP-estimates can be attributed to random noise in the per-variant estimates under the null hypothesis (considering most genome-wide SNPs as not associated with eGFR-decline). We extended this validation experiment by three further studies, and found the same (**Supplementary Figure S4D**). In summary, we concluded that the formula-derived association estimates worked well in this setting for the 265 variants and also, with some more random noise, for the other genome-wide variants.

Of note, these validation meta-analyses included general population studies as well as studies of specific scope: hospital-based (MGI), focused on individuals aged 70+ years (AugUR), focused on individuals with chronic kidney disease (GCKD), or focused on individuals with DM (Diacore).

#### **Supplementary Note S4: Graphical illustration of the relationship between SNP-effects on eGFR-decline unadjusted and adjusted for eGFR-baseline.**

**Figure 2C** provides an informative geometrical illustration for the relationship between a SNP-effect on eGFR-decline baseline-unadjusted (standardized, depicted on Y-axis),  $\hat{\beta}_{DECLINE}/sd_{DECLINE}$ , and the SNP-effect on eGFR-decline baseline-adjusted (standardized to Y-axis scale),  $\hat{\beta}_{DECLINE\_adj\_BL}/sd_{DECLINE} = \hat{\beta}_{DECLINE}/sd_{DECLINE} + r_{decline,BL} * (-\hat{\beta}_{BL}/sd_{BL})$ , where  $r_{DECLINE,BL}$  is the phenotypic correlation of baseline-unadjusted eGFR-decline with baseline eGFR and  $\hat{\beta}_{BL}/sd_{BL}$  is the standardized variant effect on baseline eGFR.

While this relationship was derived per study (**Supplementary Note S1**), this also holds approximately for meta-analyzed effect sizes, as mostly the same studies contributed to the respective meta-analyses. The difference between the two effects, baseline-adjusted and

baseline-unadjusted decline,  $r_{\text{decline,BL}} * (-\hat{\beta}_{\text{BL}}/sd_{\text{BL}})$ , can be visualized when adding the phenotype correlation line,  $f(x) = r_{\text{DECLINE,BL}} * x$  (mean correlation across studies= 0.34): while the baseline-unadjusted decline effect,  $\hat{\beta}_{\text{DECLINE}}/sd_{\text{DECLINE}}$ , is the vertical distance from symbol to X-axis, the baseline-adjusted decline effect,  $\hat{\beta}_{\text{DECLINE\_adj\_BL}}/sd_{\text{DECLINE}}$ , is the vertical distance from symbol to phenotype correlation line.

### **Supplementary Note S5: Comparison of the signals for eGFR-decline unadjusted and adjusted for eGFR-baseline and cross-sectional eGFR for the 11 identified loci**

We compared the association signals for the 11 identified loci for eGFR-decline (unadjusted for eGFR-baseline) with signals for eGFR-decline adjusted for eGFR-baseline with signals for eGFR cross-sectional<sup>S12</sup> in regional association plots (**Supplementary Figure S5A-C**),

For the 4 variants identified for eGFR-decline unadjusted for eGFR-baseline, we found unadjusted eGFR-decline signals to coincide with adjusted eGFR-decline signals and with cross-sectional eGFR signals (**Supplementary Figure S5A**). Lead variants for unadjusted eGFR-decline (i.e. the variant with the smallest P-value for unadjusted eGFR-decline) were the same or highly correlated with the respective cross-sectional lead variants ( $r^2$ =same, same, 1.00 and 0.93 for *UMOD-PDILT* (2), *PRKAG2* and *SPATA7*, respectively).

Among the 5 lead variants identified by GWAS on eGFR-decline adjusted for eGFR-baseline with significant association for eGFR-decline unadjusted for eGFR-baseline (i.e. “genuine” eGFR-decline variants, **Supplementary Figure S5B**), all signals for decline adjusted coincided with respective signals for decline unadjusted, except for the *TPPP* locus (but there, the signal for decline unadjusted sharpened when including the studies with lower imputation quality and then coincided). Three of the 5 lead variants were the same as (*FGF5*) or highly correlated with (*C15ORF54* and *ACVR2B*,  $R^2=0.61$  and 0.98) the respective lead variants for decline unadjusted. In the *OVOL1* locus, the lead variant for decline adjusted (rs4930319) depicted the same association signal as for decline unadjusted, but was not highly correlated with the variant with the smallest P-value for decline unadjusted ( $R^2$  with rs117829045=0.11) due to differing allele frequencies (MAF=0.11 and 0.33, respectively); the variants were suggested to be inherited via the same haplotypes ( $D'=1.00$ ). Among the 5 variants, we found 3 signals for eGFR-decline adjusted for eGFR-baseline to coincide with the signal for cross-sectional eGFR (for *FGF5*, *OVOL1*, *ACVR2B*) and lead variants for decline adjusted as highly correlated with the respective lead variants for cross-sectional eGFR ( $r^2=0.95$ , 0.98, 0.96, respectively; **Supplementary Figure S5B**). In *C15ORF54* and *TPPP* loci, the decline adjusted signal appeared to be a 2<sup>nd</sup> signal for cross-sectional eGFR: the lead variant for decline adjusted were not correlated with the lead variant for cross-sectional eGFR ( $R^2=0.04$  and 0.11). The lead variant for decline adjusted near *TPPP* depicted a cross-sectional signal 22kb distant from the reported cross-sectional lead variant with different allele

frequencies (MAF=0.49 and 0.27, respectively;  $D'=0.57$ ); of note, the lead variants for decline adjusted captured a 2<sup>nd</sup> signal identified in the recently published cross-sectional eGFR analysis<sup>S19</sup> and there the lead variants were exactly the same. The *C15ORF54* lead variant for decline adjusted was highly correlated with a 2<sup>nd</sup> signal for cross-sectional eGFR (rs28833881,  $r^2=0.98$ ).

For the 3 loci identified by eGFR-decline adjusted for eGFR-baseline without significant association with eGFR-decline unadjusted for eGFR-baseline (i.e., not a genuine eGFR-decline association), there was no signal for decline unadjusted (*GATM*, *CPS1*, *SHROOM3*; **Supplementary Figure S5C**). The lead variants for decline adjusted were the same or highly correlated with the respective cross-sectional eGFR lead variant ( $R^2=0.98$ , same, 0.59).

### **Supplementary Note S6: Age-dependency of SNP-effects and main age effect on eGFR.**

Before interpreting SNP-by-age interaction effects on cross-sectional eGFR<sub>crea</sub> and eGFR<sub>cys</sub>, we evaluated the main age effect on eGFR<sub>crea</sub> and eGFR<sub>cys</sub> (i.e. age and sex in the model). We found large main age effects, which were fairly linear: beta-estimate per year of age [95%-CI] = -0.775 units [-0.780, -0.771] and -1.024, [-1.030, -1.019] on eGFR<sub>crea</sub> or eGFR<sub>cys</sub>, respectively (**Supplementary Figure S6Z**). We nevertheless allowed for non-linear main age effects in the SNP-by-age interaction analyses, since the main age effect was large and even a slight deviation from non-linearity can distort interaction effects if unaccounted.

We found the age-dependency of the SNP-effects on eGFR<sub>crea</sub> and eGFR<sub>cys</sub> (i.e. age-effect in the interaction term) to be fairly linear when non-linear modelling of main age effect was applied (**Supplementary Figure 6 SA,B,C**). Of note, when the main age effect was modelled linearly, the SNP-effects on eGFR<sub>crea</sub> and eGFR<sub>cys</sub> appeared to be non-linearly modified by age, which is a known problem in interaction analyses (data not shown); this supported the choice of the main age effect modelled non-linearly.

### **Supplementary Note S7: Narrow-sense heritability**

We estimated SNP-based heritability ( $h^2$ ) for eGFR-baseline and for eGFR-decline unadjusted and adjusted for eGFR-baseline using the genomic relatedness matrix restricted maximum likelihood (GREML) method as implemented in the GCTA software package (<https://yanglab.westlake.edu.cn/software/gcta/#Overview>). For this, we used individual participant data from UK Biobank for the ~15,000 unrelated individuals of European ancestry that had baseline and follow-up eGFR measurements available.

We estimated narrow-sense heritability ( $h^2$ ) for eGFR-decline at 1% (standard error 2%,  $P = 0.31$ ) and 5% for eGFR-decline adjusted for baseline (standard error 2.1%,  $P = 0.0075$ ) and 20% (standard error 2.5%,  $P < 1.00 \times 10^{-100}$ ) for eGFR-baseline.

The small heritability for eGFR-decline in UK Biobank might derive from a large measurement error in eGFR-decline based on a study with only two measurements only 4 years apart. The larger heritability for eGFR-decline adjusted for eGFR-baseline compared to unadjusted for eGFR-baseline is reflective of the collider bias.

**Supplementary Figure S1: Meta-analysis workflow.** Shown is the meta-analysis workflow to capture the sequential recruitment and different suite of computed models (eGFR-decline unadjusted and adjusted for eGFR-baseline, “decline” and “decline adjusted”). In the first level, we conducted a meta-analysis of summary statistics across studies that were part of CKDGen since a long time (“old CKDGen studies”, green boxes) and a meta-analysis across recently joined CKDGen studies (“new studies”, blue boxes) and UK Biobank (orange box). In a second level, we meta-analyzed these two results. At each level, genomic-control (GC) correction was applied, when lambda was >1.00.

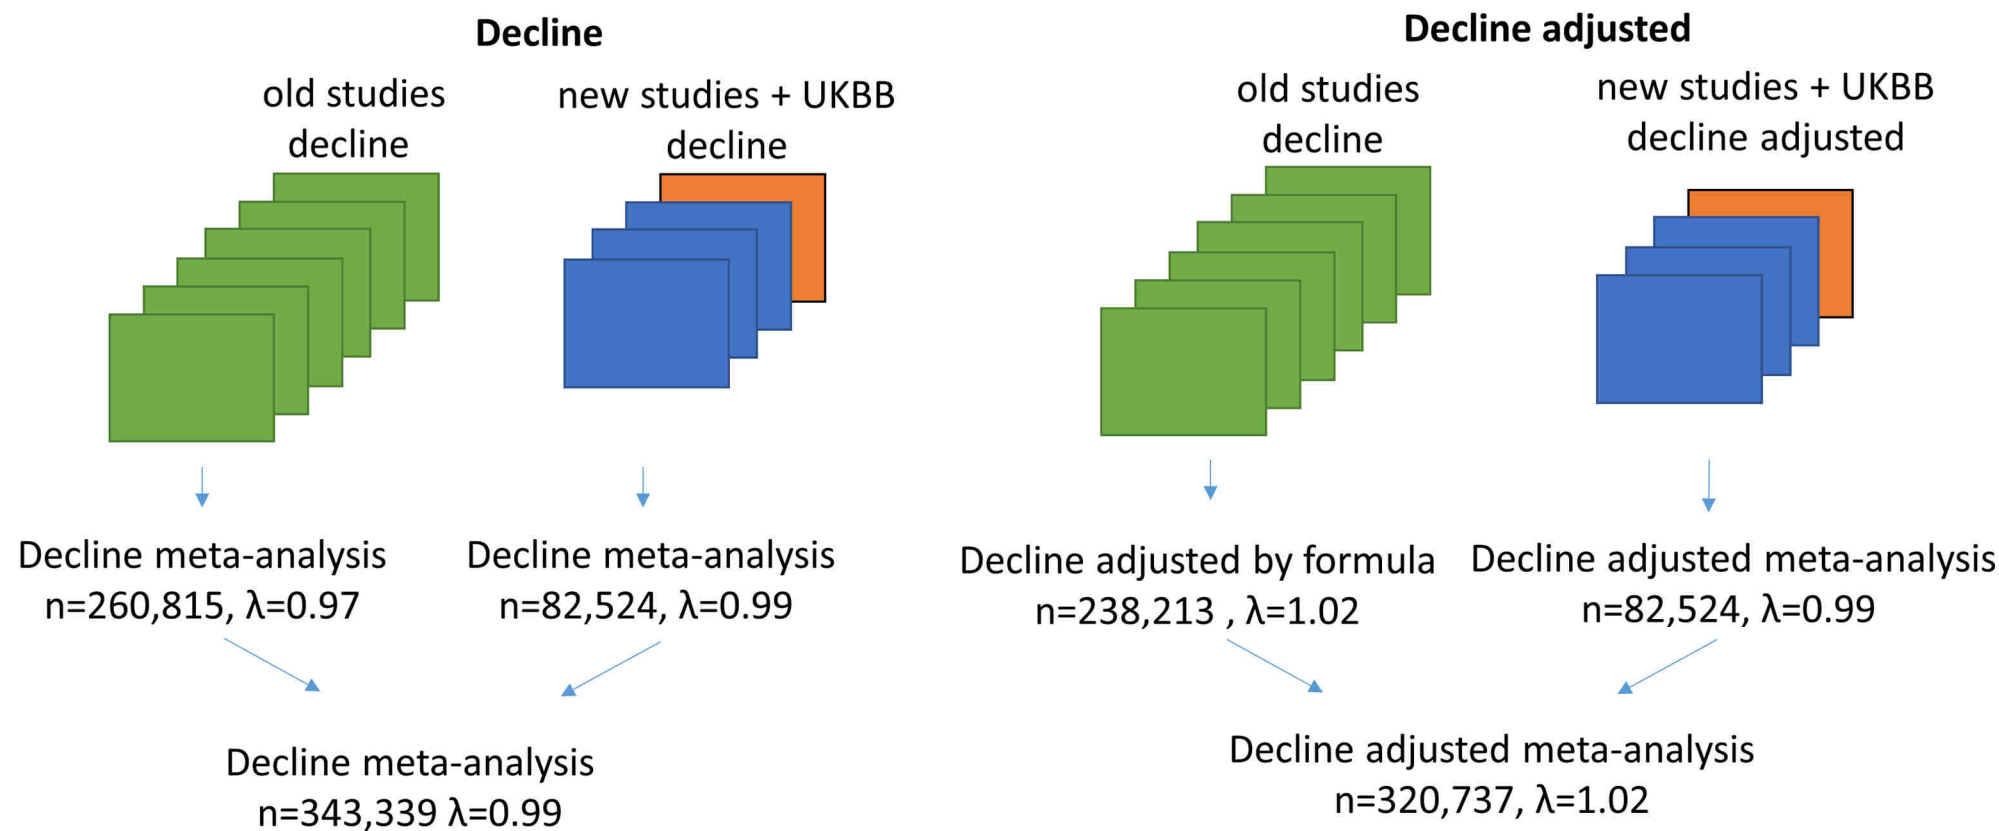

**Supplementary Figure S2: Study-specific median annual eGFR-decline versus sample size, follow-up time and median age.** Shown are, for each of the 62 studies, the study-specific median of annual eGFR-decline versus (A) number of individuals, (B) time to follow-up, and (C) median age at baseline. Whiskers represent interquartile range.

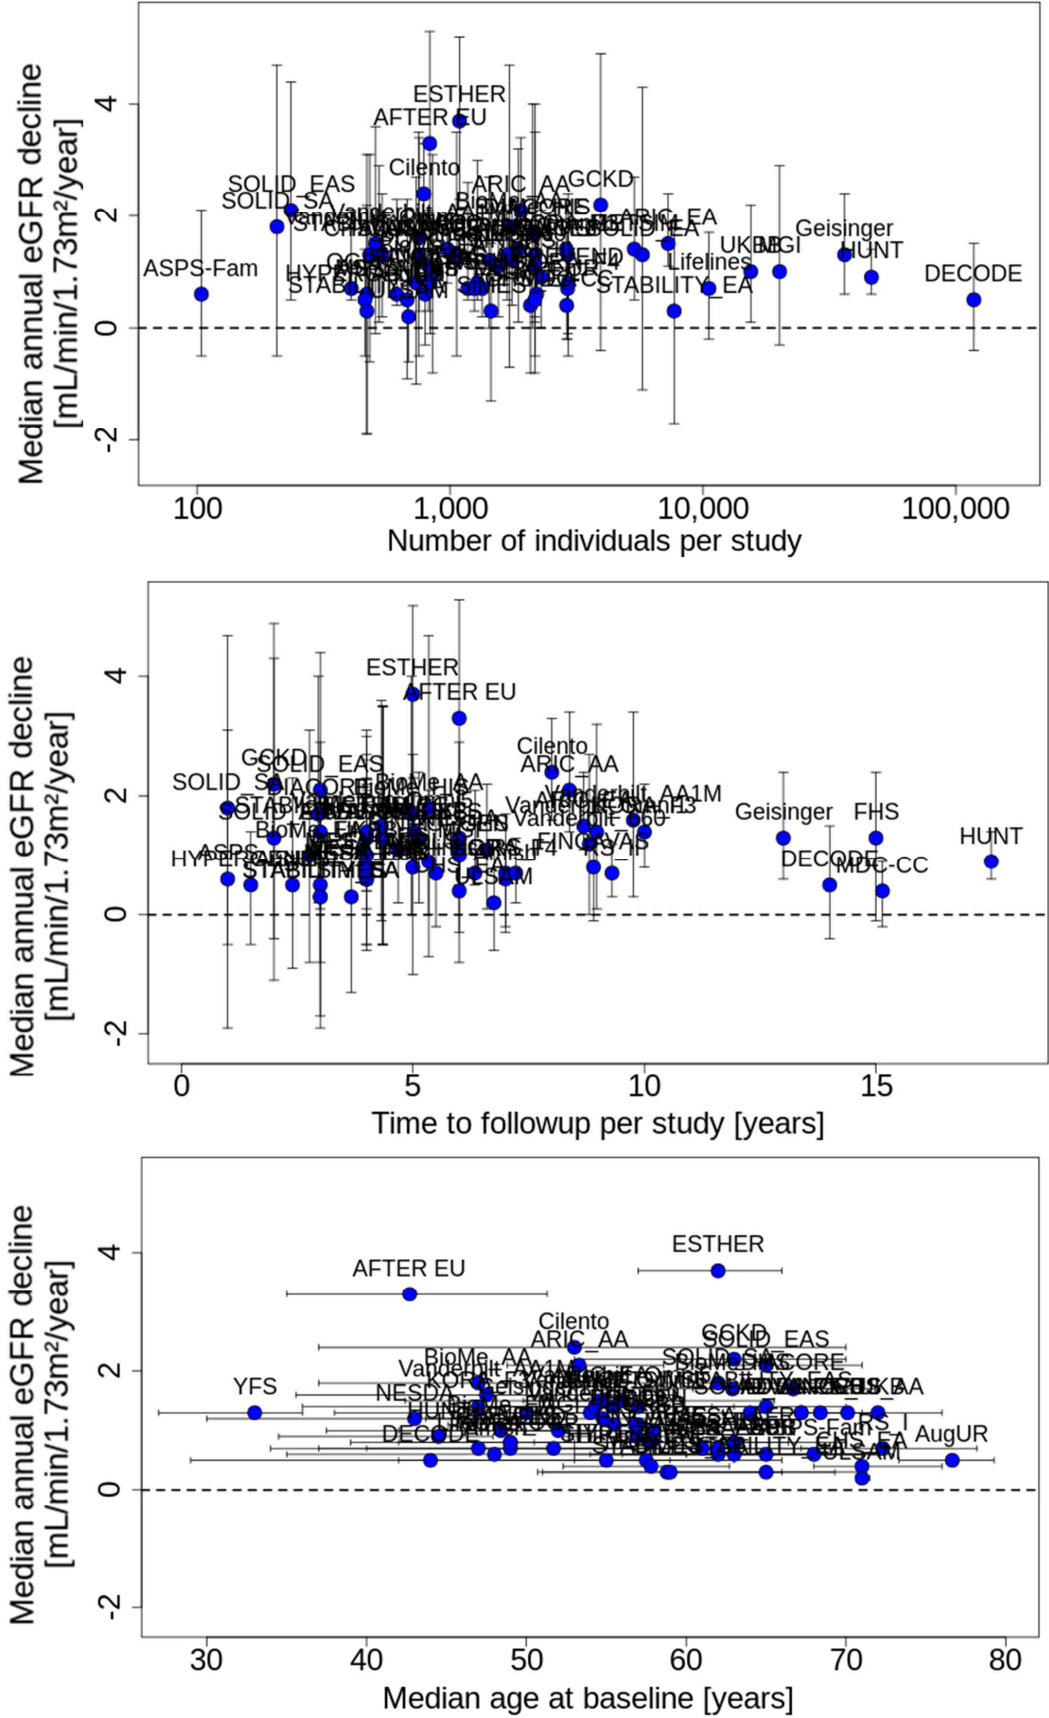



**Supplementary Figure S3: No influence of alternative adjustments for age on eGFR-decline in UK Biobank.** We explored alternative adjustments for age in UK Biobank (n=15,442, age range 40-70 years): **(A)** residuals of eGFR-decline adjusted for age, sex, and  $\ln(\text{eGFR-baseline})$  versus residuals of eGFR-decline adjusted for age, sex and residuals ( $\ln(\text{eGFR-baseline})$ ) adjusted for age and sex) and **(B)** residuals of eGFR-decline adjusted for age\_centered (i.e. centered at 50 years) and sex with residuals of eGFR-decline adjusted for age\_centered,  $(\text{age\_centered})^2$  and sex. Alternative adjustments did not change the GWAS phenotype.

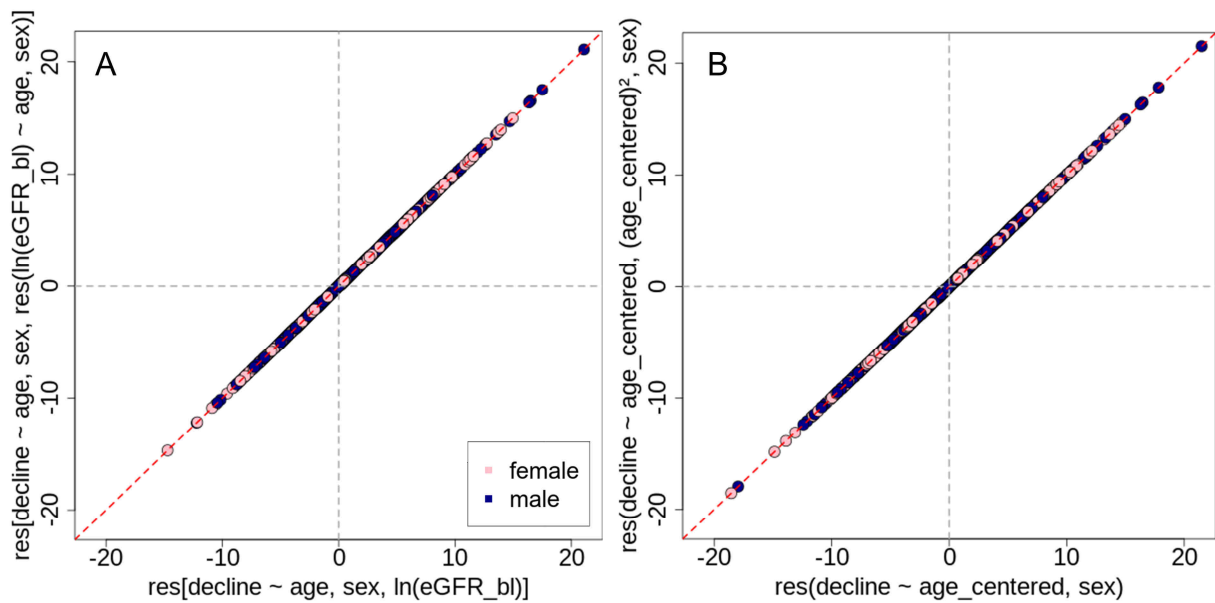

**Supplementary Figure S4A: No influence from adjusting SNP-associations for eGFR-decline for diabetes mellitus (DM).** We compared SNP-associations for eGFR-decline with DM-adjustment with SNP-associations for eGFR-decline without adjustment for DM in recently joined CKDGen studies, UK Biobank, several “old CKDGen studies”, and their meta-analysis (total=103,970; **Supplementary Note S2**). Columns 1&2 show beta-estimates and standard errors (SE) among the 265 variants known for cross-sectional eGFR<sup>S12</sup>, where we had a prior hypothesis that these might be associated with eGFR-decline. Columns 3&4 show betas and SEs genome-wide, where most SNP-associations are under the Null (i.e., not associated with eGFR-decline). Column 5 shows QQ-plots for P-values genome-wide. Coded allele is the cross-sectional eGFR-lowering allele, SNPs with minor allele frequency  $\geq 0.05$  are in green and with minor allele frequency  $< 0.05$  in orange. All SNPs have imputation quality  $> 0.6$  and  $MAC > 10$  for each study.

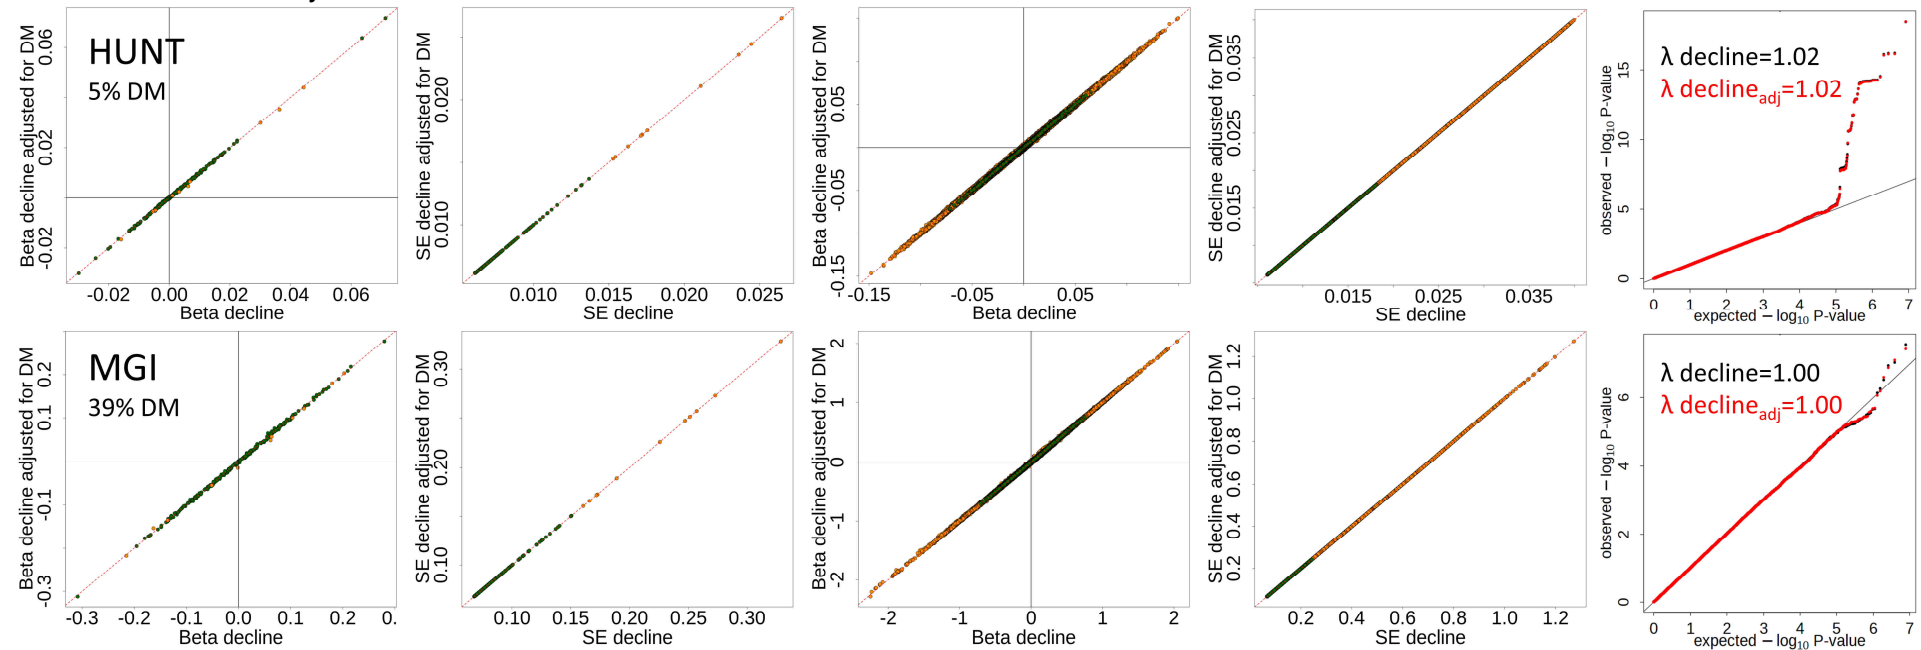

Supplementary Figure S4A: continued

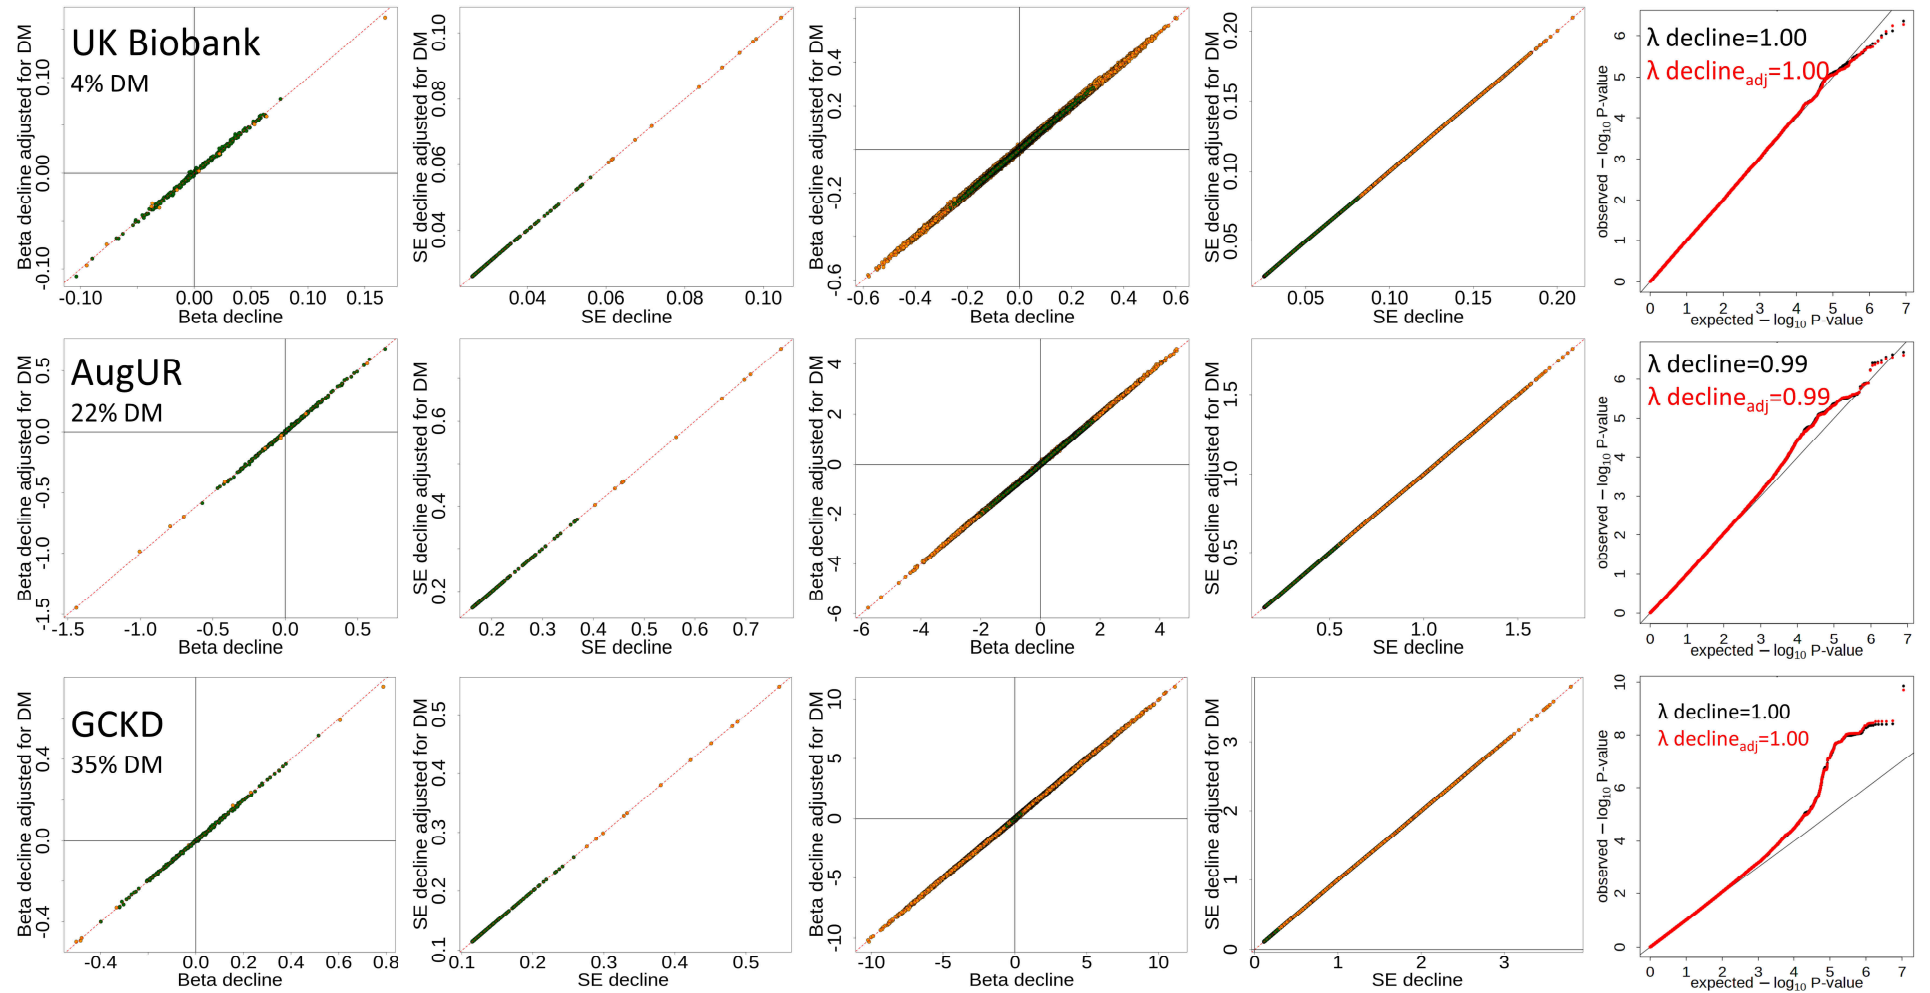

Supplementary Figure S4A: continued

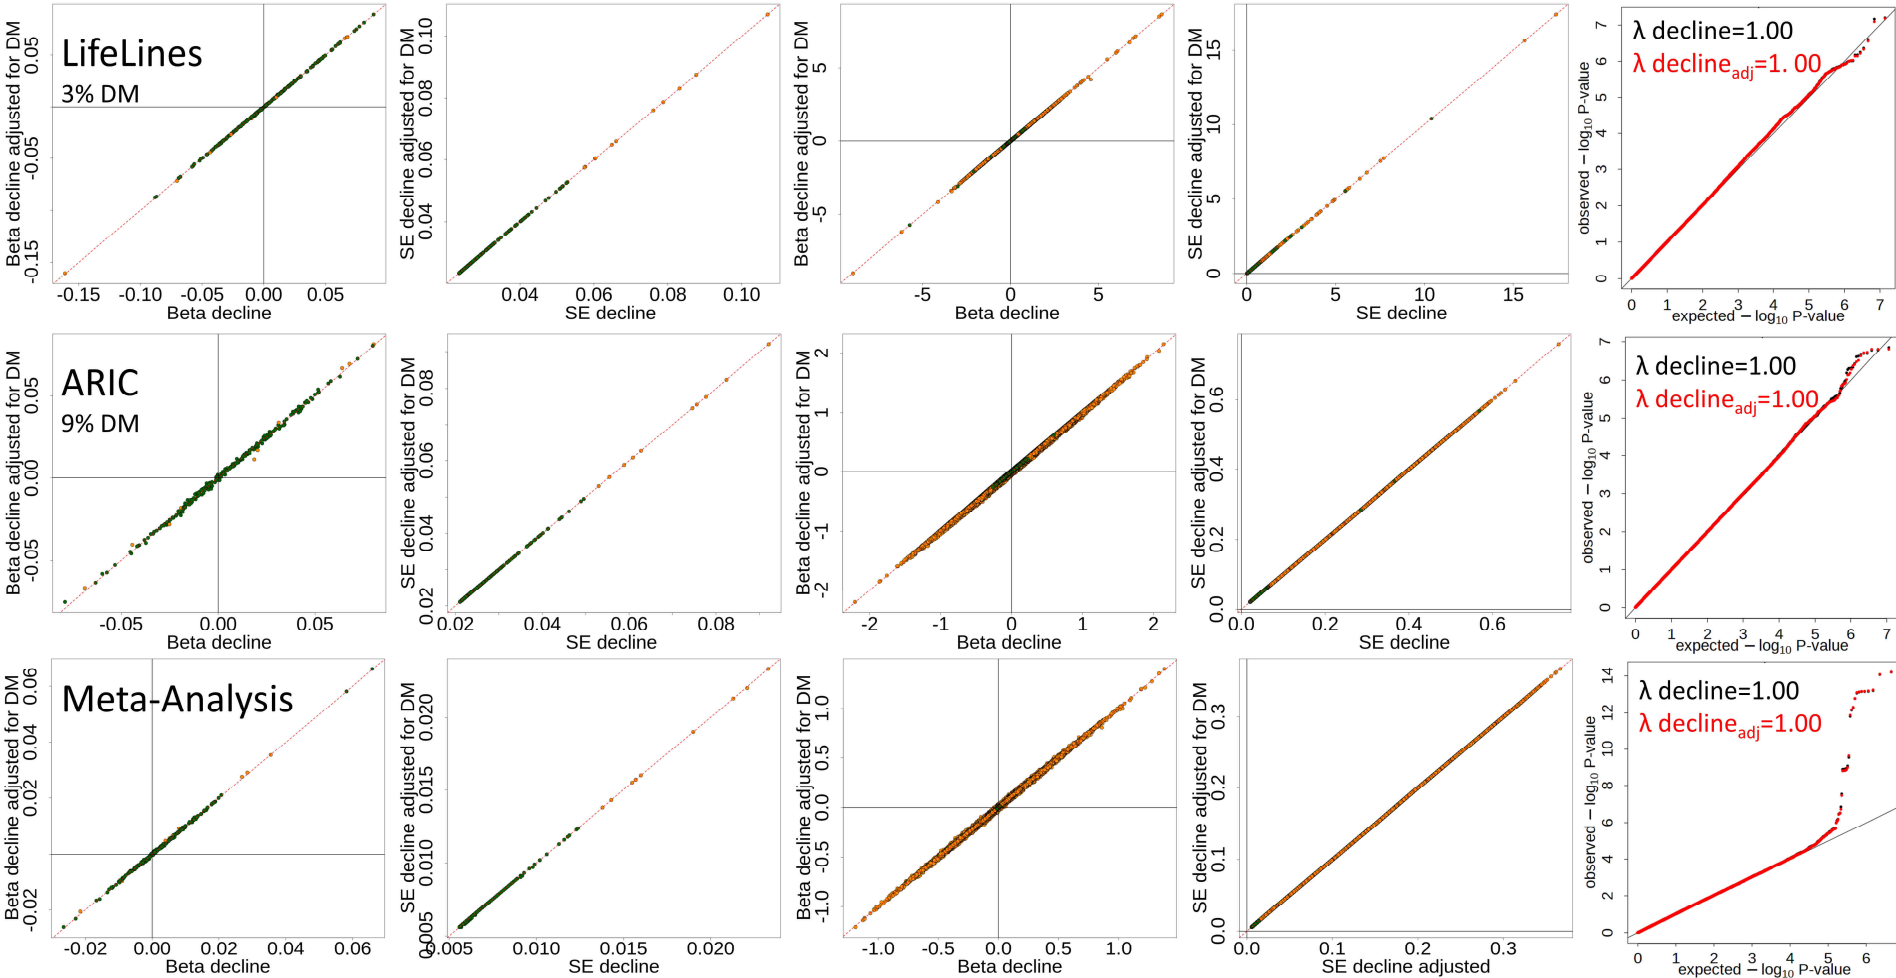

**Supplementary Figure S4B: Differences between SNP-association for eGFR-decline unadjusted versus adjusted for eGFR-baseline** We compared SNP-associations for eGFR-decline adjusted for eGFR-baseline with SNP-associations for eGFR-decline unadjusted for eGFR-baseline in recently joined studies, UK Biobank, several “old CKDGen studies”, and their meta-analysis (total=103,970). Columns 1&2 show beta-estimates and standard errors (SE) among the 265 variants known for cross-sectional eGFR<sup>S12</sup>, where we had a prior hypothesis that these might be associated with eGFR-decline. Columns 3&4 show betas and SEs genome-wide, where most SNP-associations are under the Null (i.e., not associated with eGFR-decline). Column 5 shows QQ-plots for P-values genome-wide. Coded allele is the cross-sectional eGFR- lowering allele, SNPs with minor allele frequency  $\geq 0.05$  are in green and with minor allele frequency  $< 0.05$  in orange. All SNPs have imputation quality  $> 0.6$  and MAC  $> 10$  for all studies.

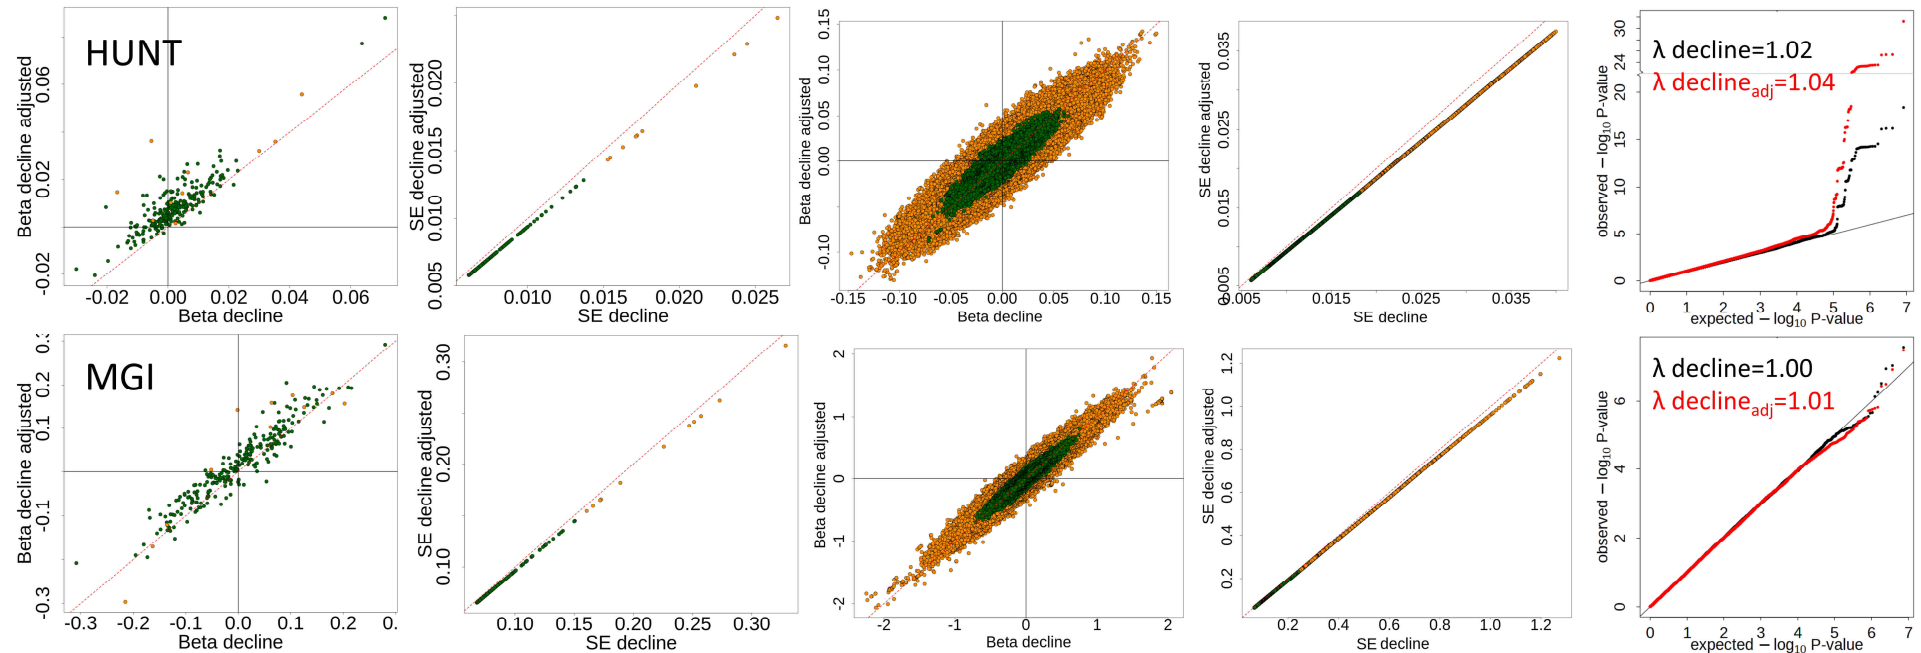

Supplementary Figure S4B: continued

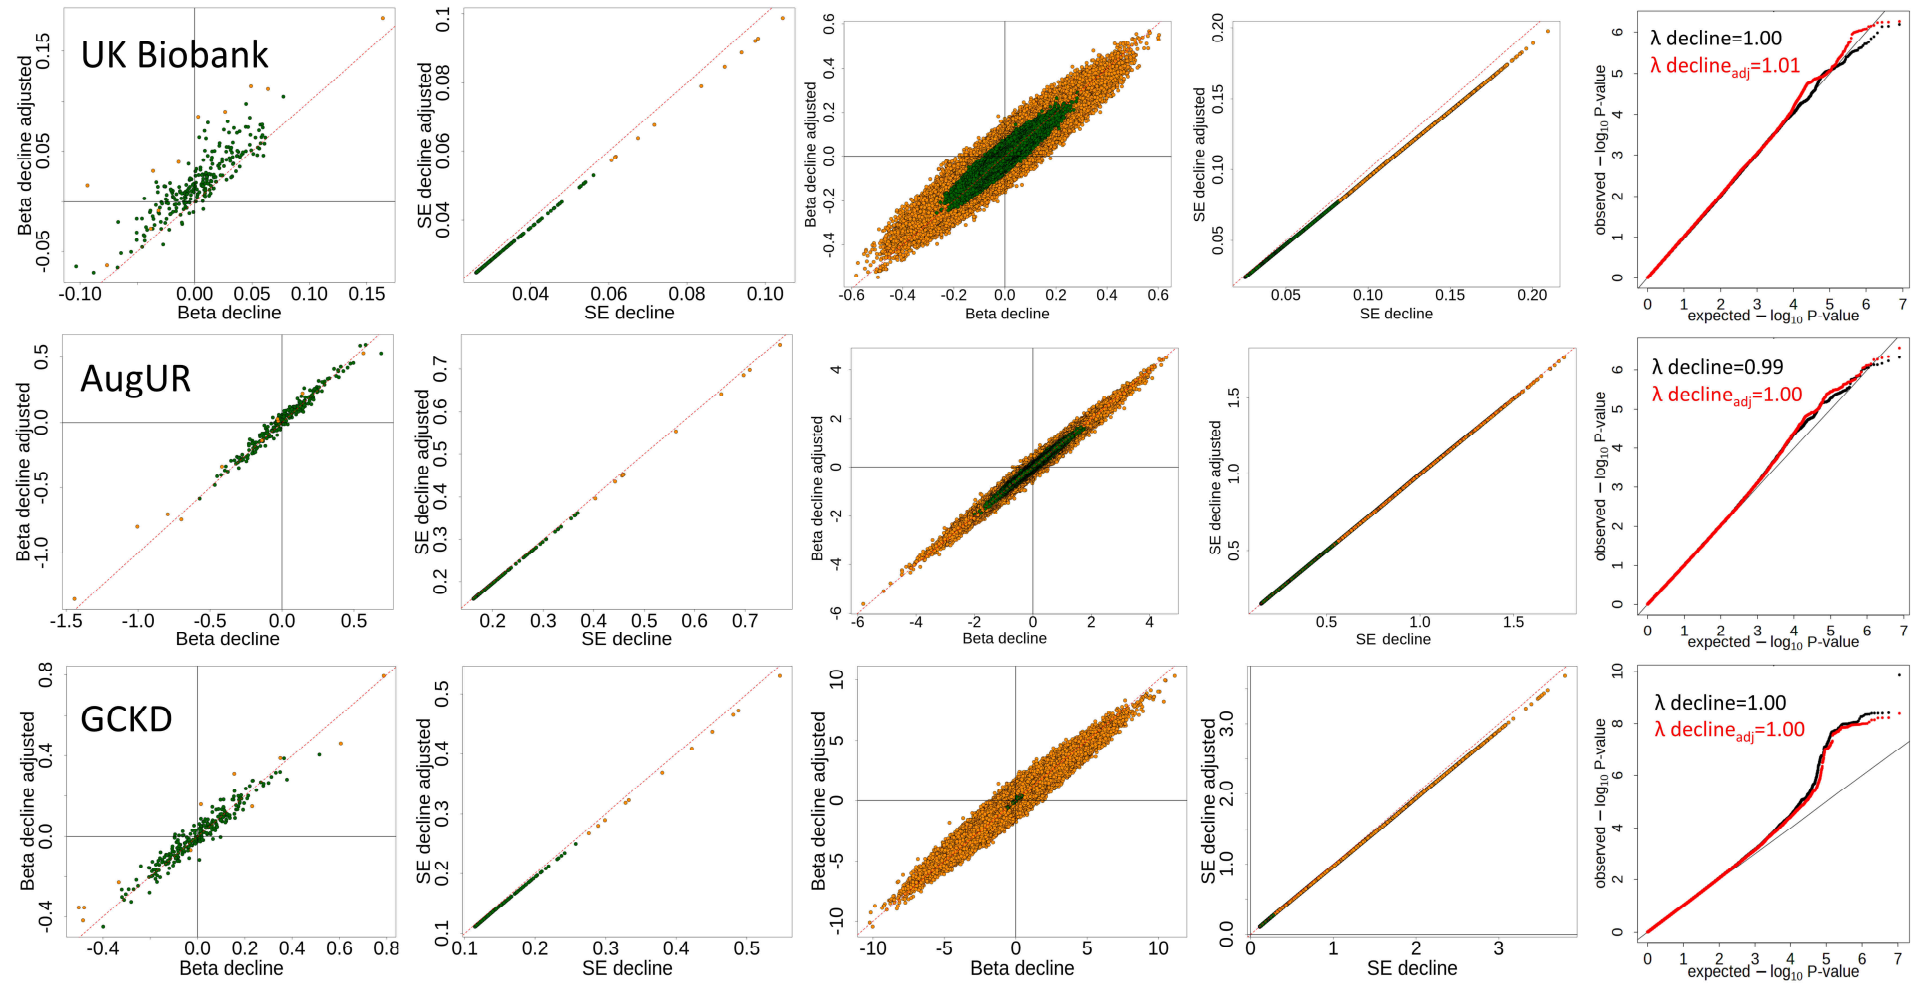

Supplementary Figure S4B: continued

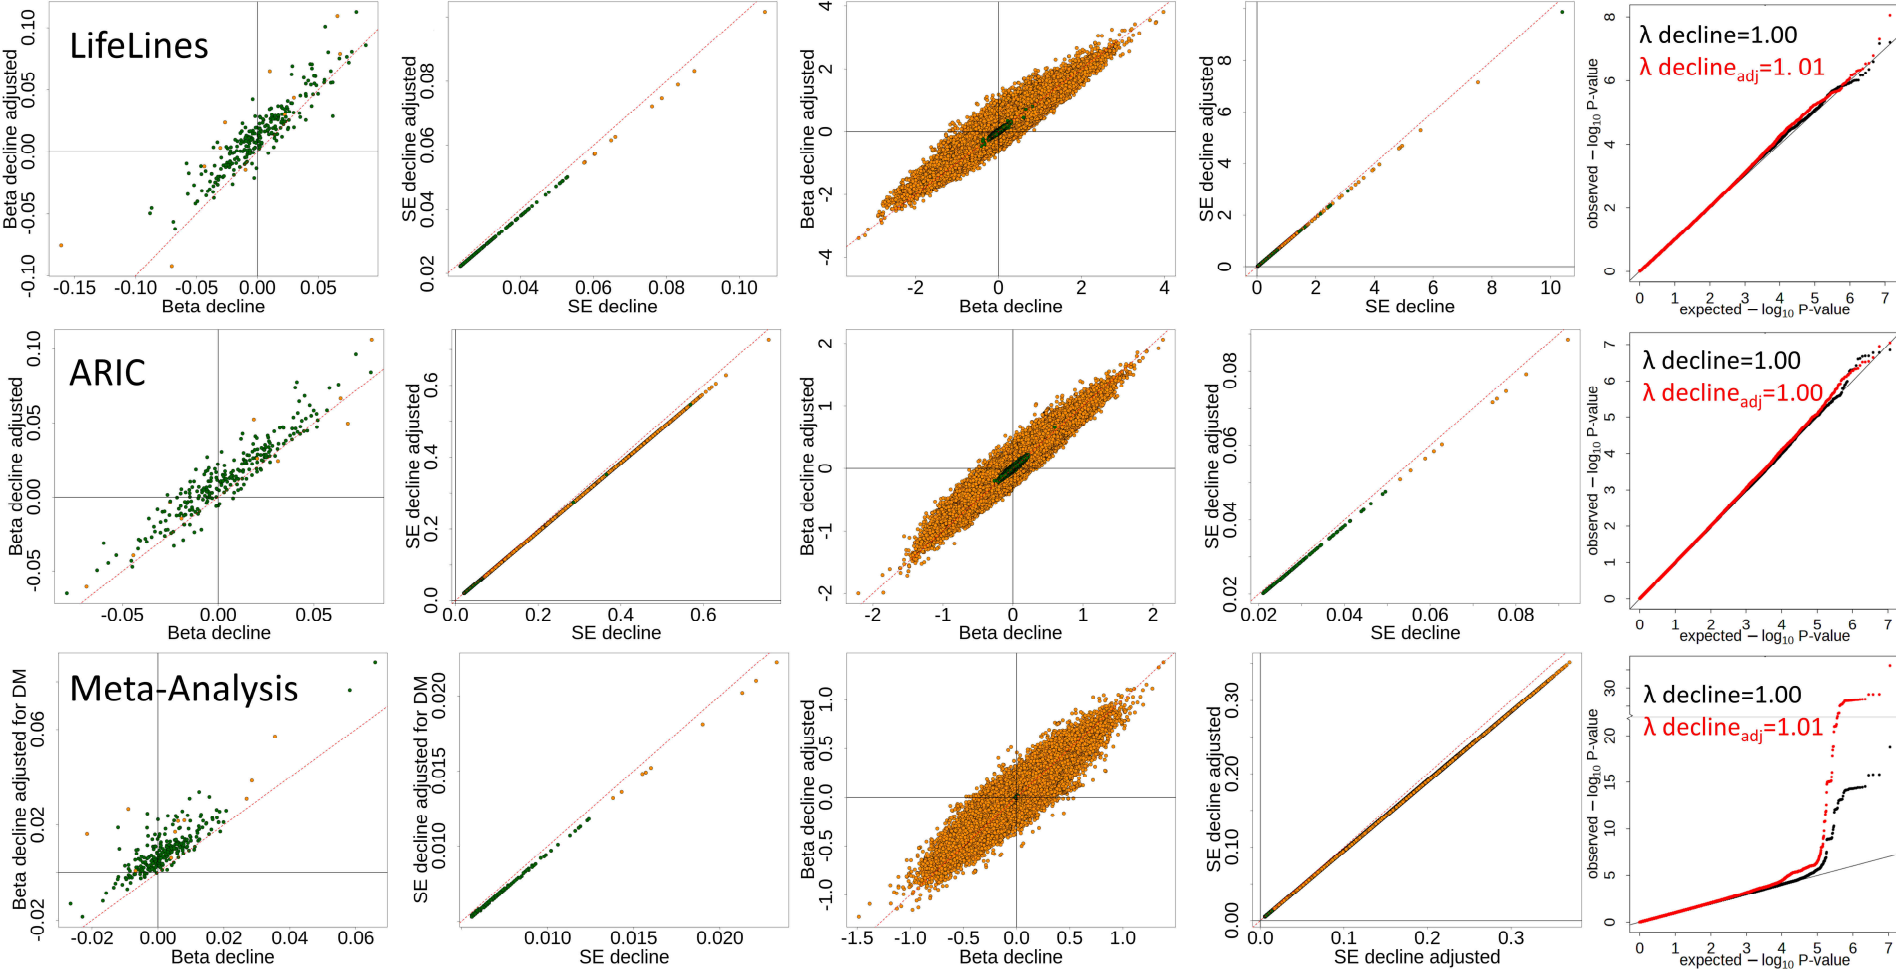

**Supplementary Figure S4C: Validation of formula-derived adjustment for eGFR-baseline in eGFR-decline associations (part 1).** We compared SNP-associations for eGFR-decline adjusted for eGFR-baseline by model with SNP-associations for eGFR-decline adjusted for eGFR-baseline by formula (using beta-estimates for eGFR-baseline) in recently joined studies, UK Biobank, several “old CKDGen studies”, and their meta-analysis (total=103,970). Columns 1&2 show beta-estimates and standard errors (SE) among the 265 variants known for cross-sectional eGFR<sup>S12</sup>, where we had a prior hypothesis that these might be associated with eGFR-decline. Columns 3&4 show betas and SEs genome-wide, where most SNP-associations are under the Null (i.e., not associated with eGFR-decline). Column 5 shows QQ-plots for P-values genome-wide. Coded allele is the cross-sectional eGFR-lowering allele, SNPs with minor allele frequency  $\geq 0.05$  are in green and with minor allele frequency  $< 0.05$  in orange. All SNPs have imputation quality  $> 0.6$  and MAC  $> 10$  for all studies.

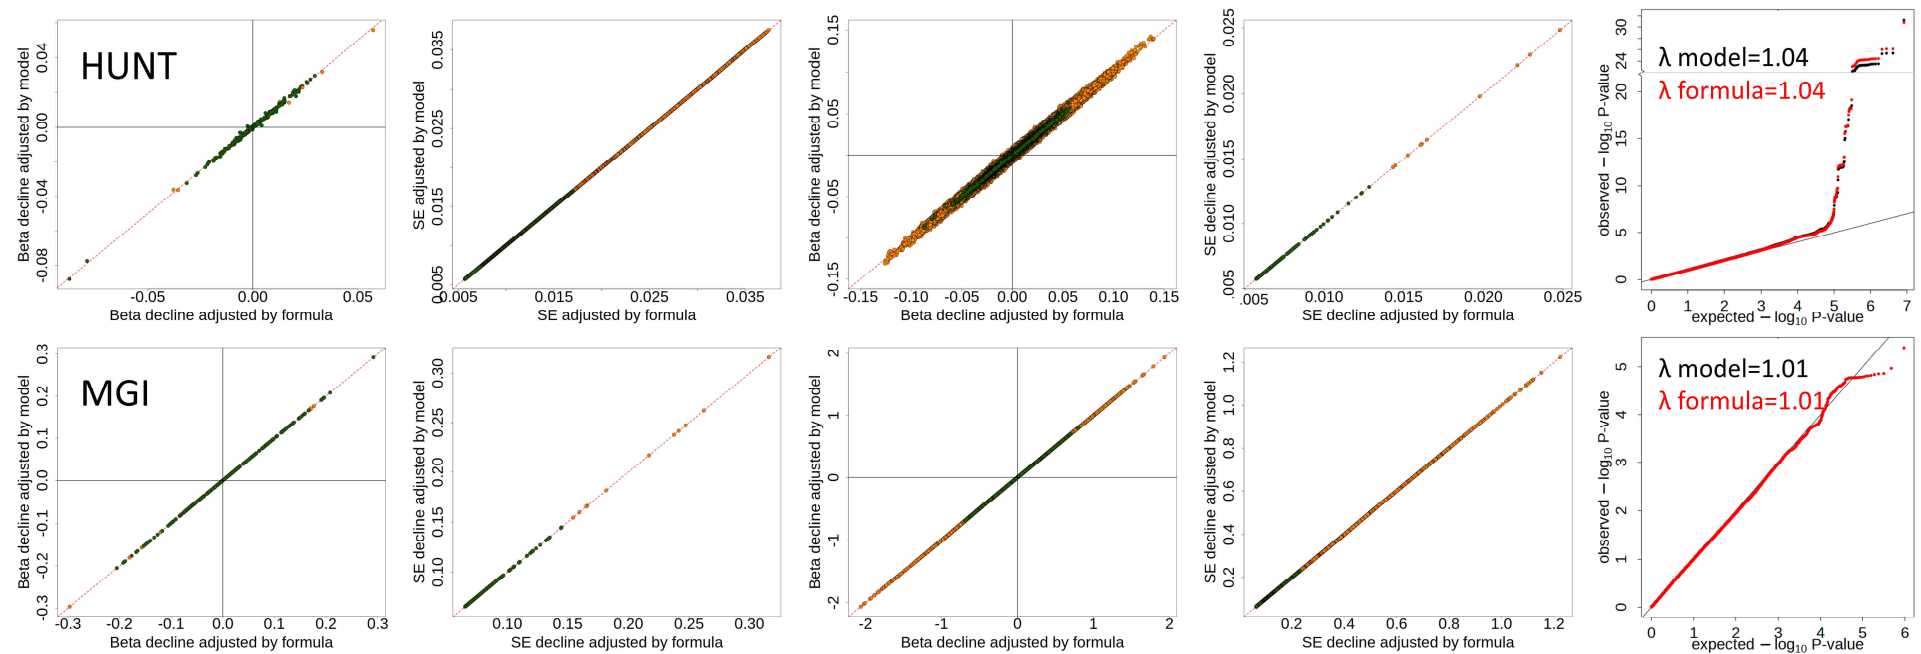



### Supplementary Figure S4C: continued

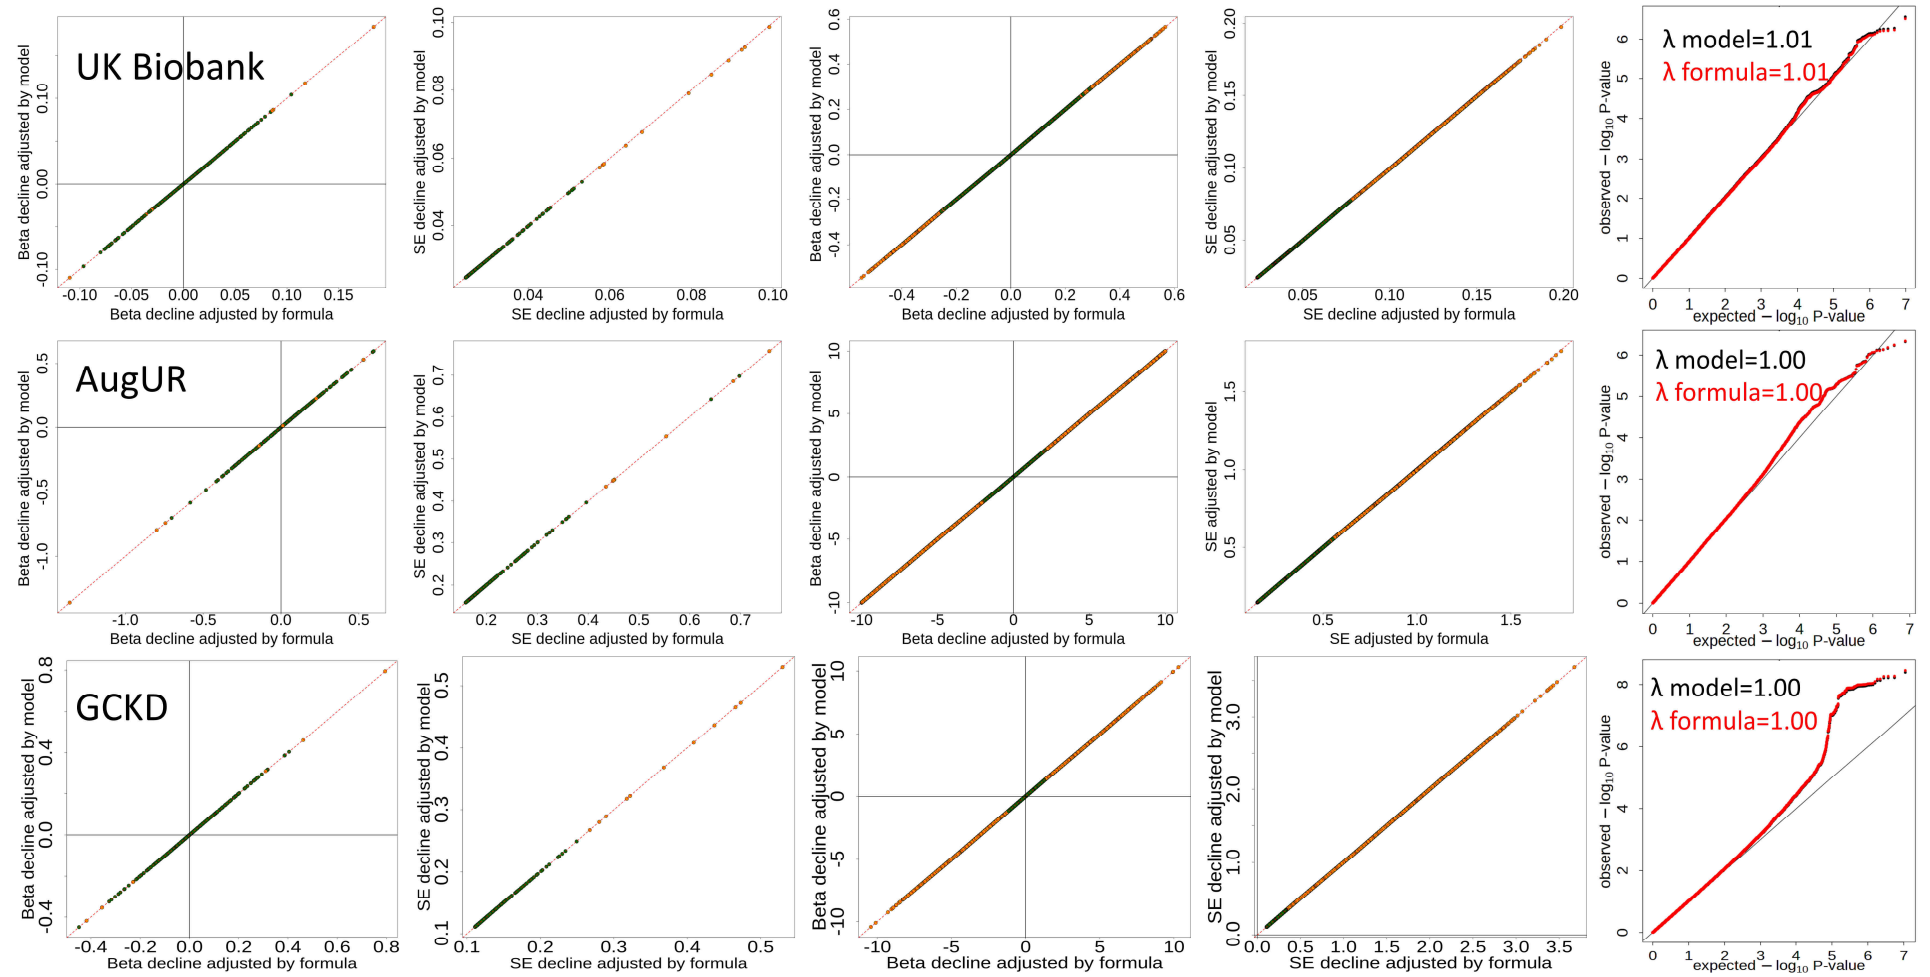

Supplementary Figure S4C: continued

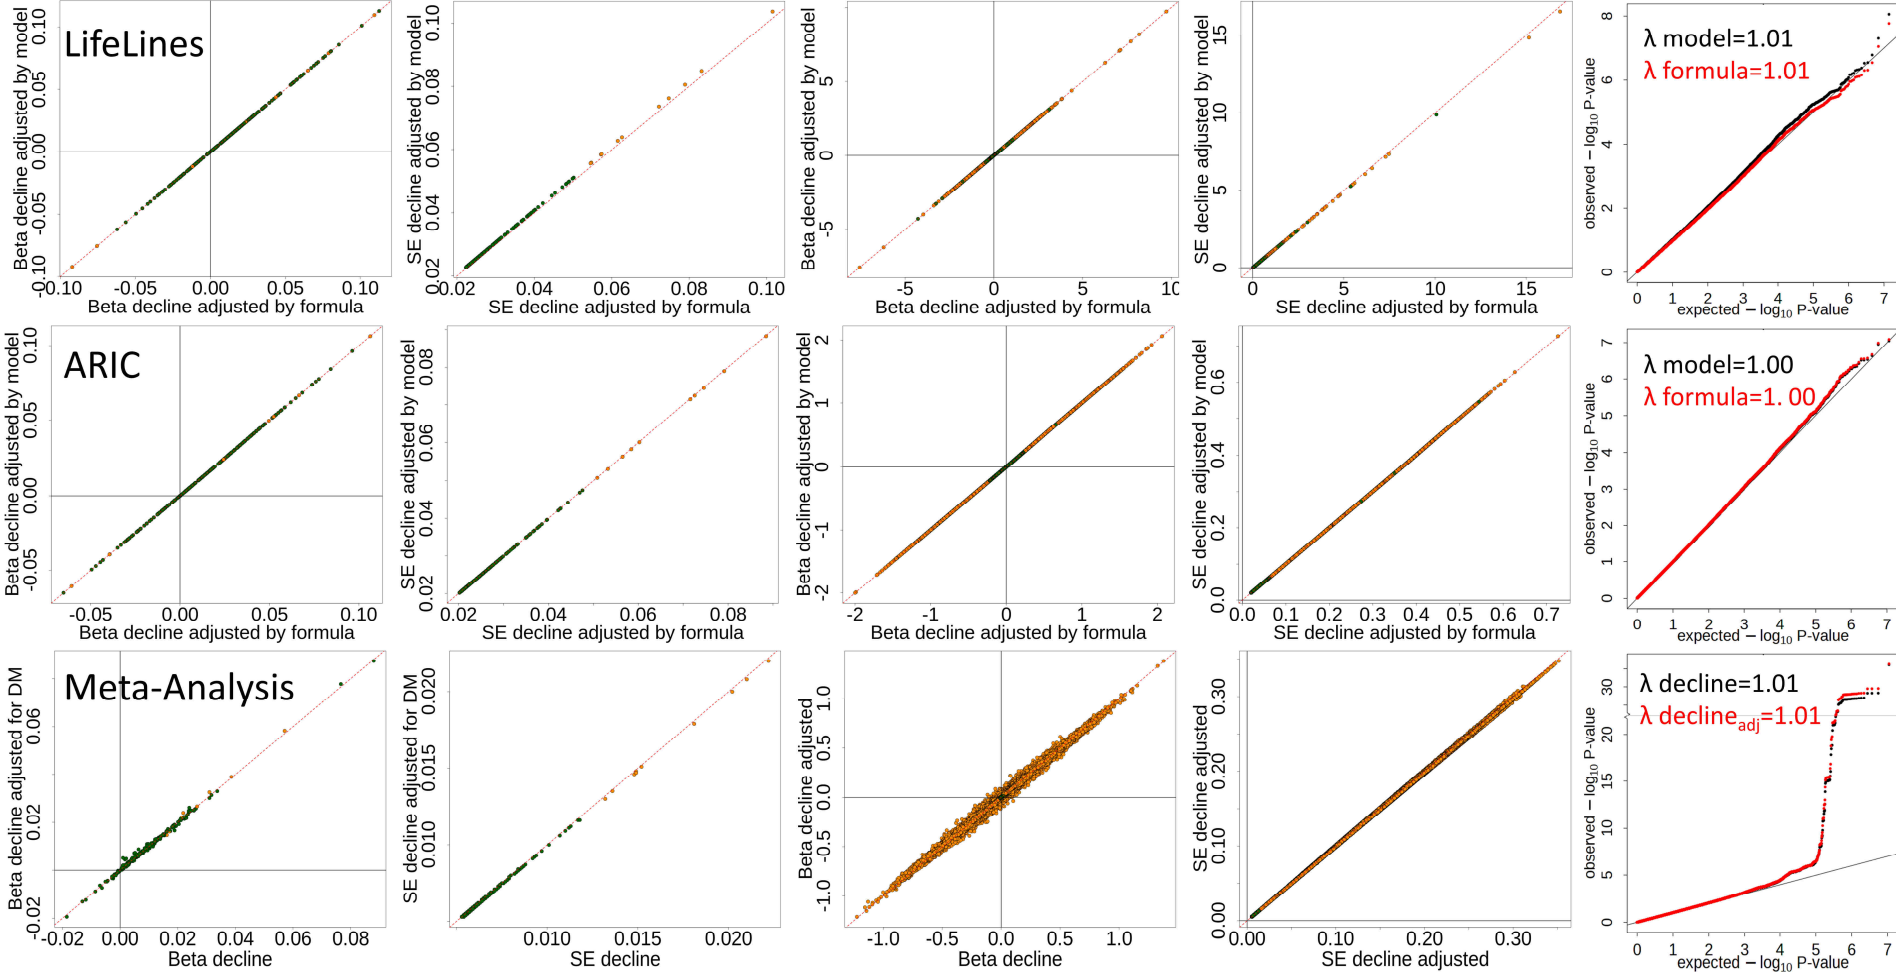

**Supplementary Figure S4D: Validation of formula-derived adjustment for eGFR-baseline in eGFR-decline associations (part 2).** In “old CKDGen studies”, sample sizes were typically larger for cross-sectional eGFR than for baseline eGFR (i.e. restricted to individuals in follow-up). We compared SNP-associations for eGFR-decline adjusted for eGFR-baseline by model with SNP-associations for eGFR-decline adjusted for eGFR-baseline by formula using beta-estimates for cross-sectional eGFR in six “old” CKDGen studies. Columns 1&2 show beta-estimates and standard errors (SE) among the 265 variants known for cross-sectional eGFR<sup>S12</sup>, where we had a prior hypothesis that these might be associated with eGFR-decline. Columns 3&4 show betas and SEs genome-wide, where most SNP-associations are under the Null (i.e., not associated with eGFR-decline). Column 5 shows QQ-plots for P-values genome-wide. Coded allele is the cross-sectional eGFR-lowering allele, SNPs with minor allele frequency  $\geq 0.05$  are in green and with minor allele frequency  $< 0.05$  in orange. All SNPs have imputation quality  $> 0.6$  and MAC  $> 10$  for all studies.

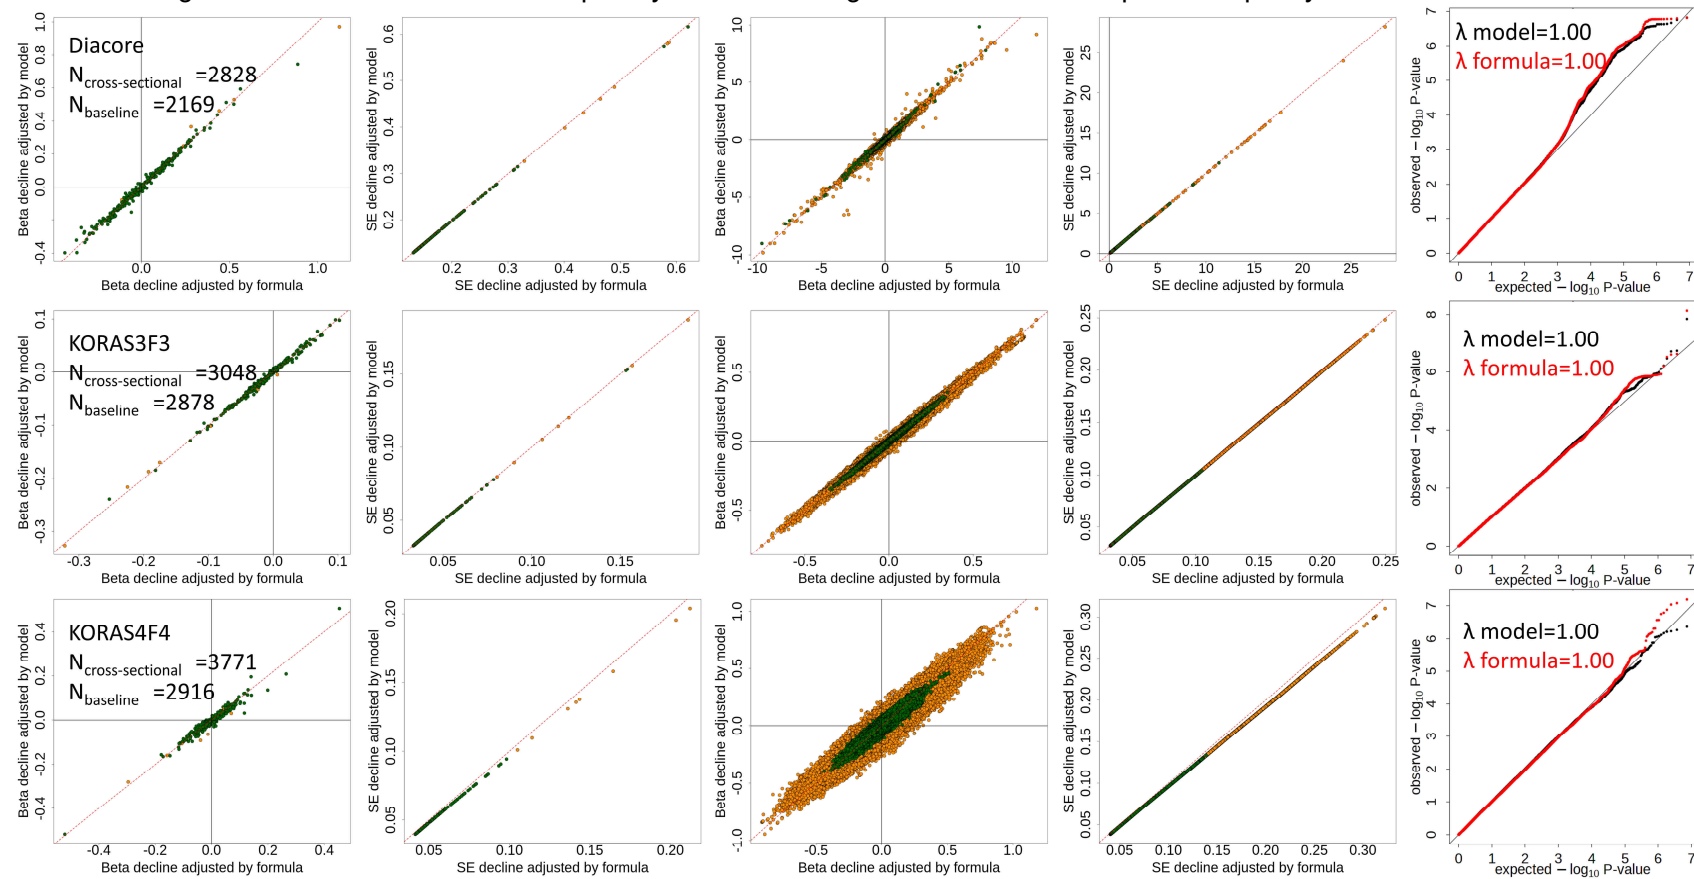

### Supplementary Figure S4D: continued

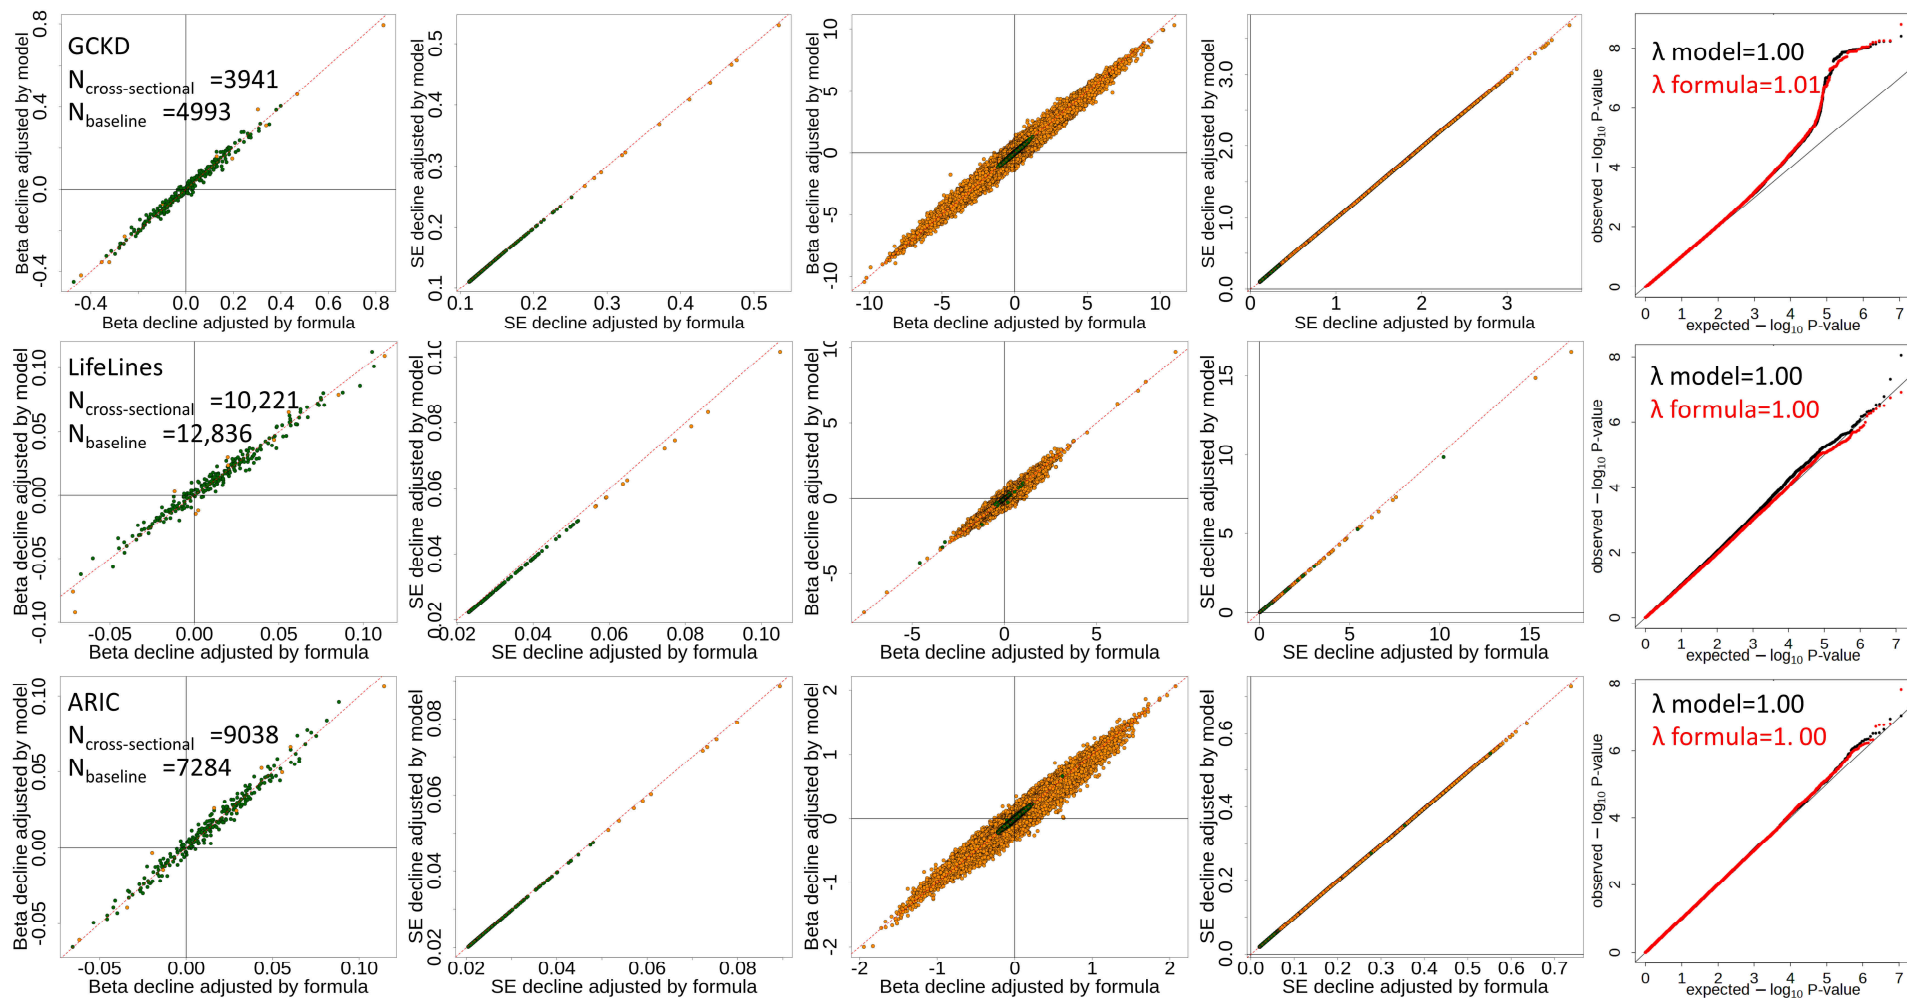

**Supplementary Figure S5A: Region plots of the 4 variants in 3 loci identified for eGFR-decline unadjusted for eGFR-baseline.** Shown are regional association plots (1<sup>st</sup> column) for cross-sectional eGFR<sup>S12</sup> (“eGFRcrea”, n up to 765,348), (2<sup>nd</sup> and 3<sup>rd</sup> column) for eGFR-decline unadjusted for eGFR-baseline (“decline”; n up to 343,339; blue dashed line P=0.05/263=1.90x10<sup>-4</sup> in 2<sup>nd</sup> column and P=0.05 in 3<sup>rd</sup> column), and (4<sup>th</sup> column) for eGFR-decline adjusted for eGFR-baseline (“decline<sub>adj</sub>”; n up to 320,737). Reference variants are the cross-sectional eGFR lead variant (1<sup>st</sup> and 2<sup>nd</sup> column) and the decline<sub>adj</sub> lead variant (i.e. variant with the smallest P-value for decline<sub>adj</sub>; 3<sup>rd</sup> and 4<sup>th</sup> column). Red lines indicate P=5.00x10<sup>-8</sup>. The decline signals coincide with the cross-sectional eGFR signals; decline lead variants are the same or highly correlated with cross-sectional eGFR lead variants (r<sup>2</sup>=same, same, 1.00 and 0.93 for *UMOD-PDILT* (2), *PRKAG2* and *SPATA7*, respectively).

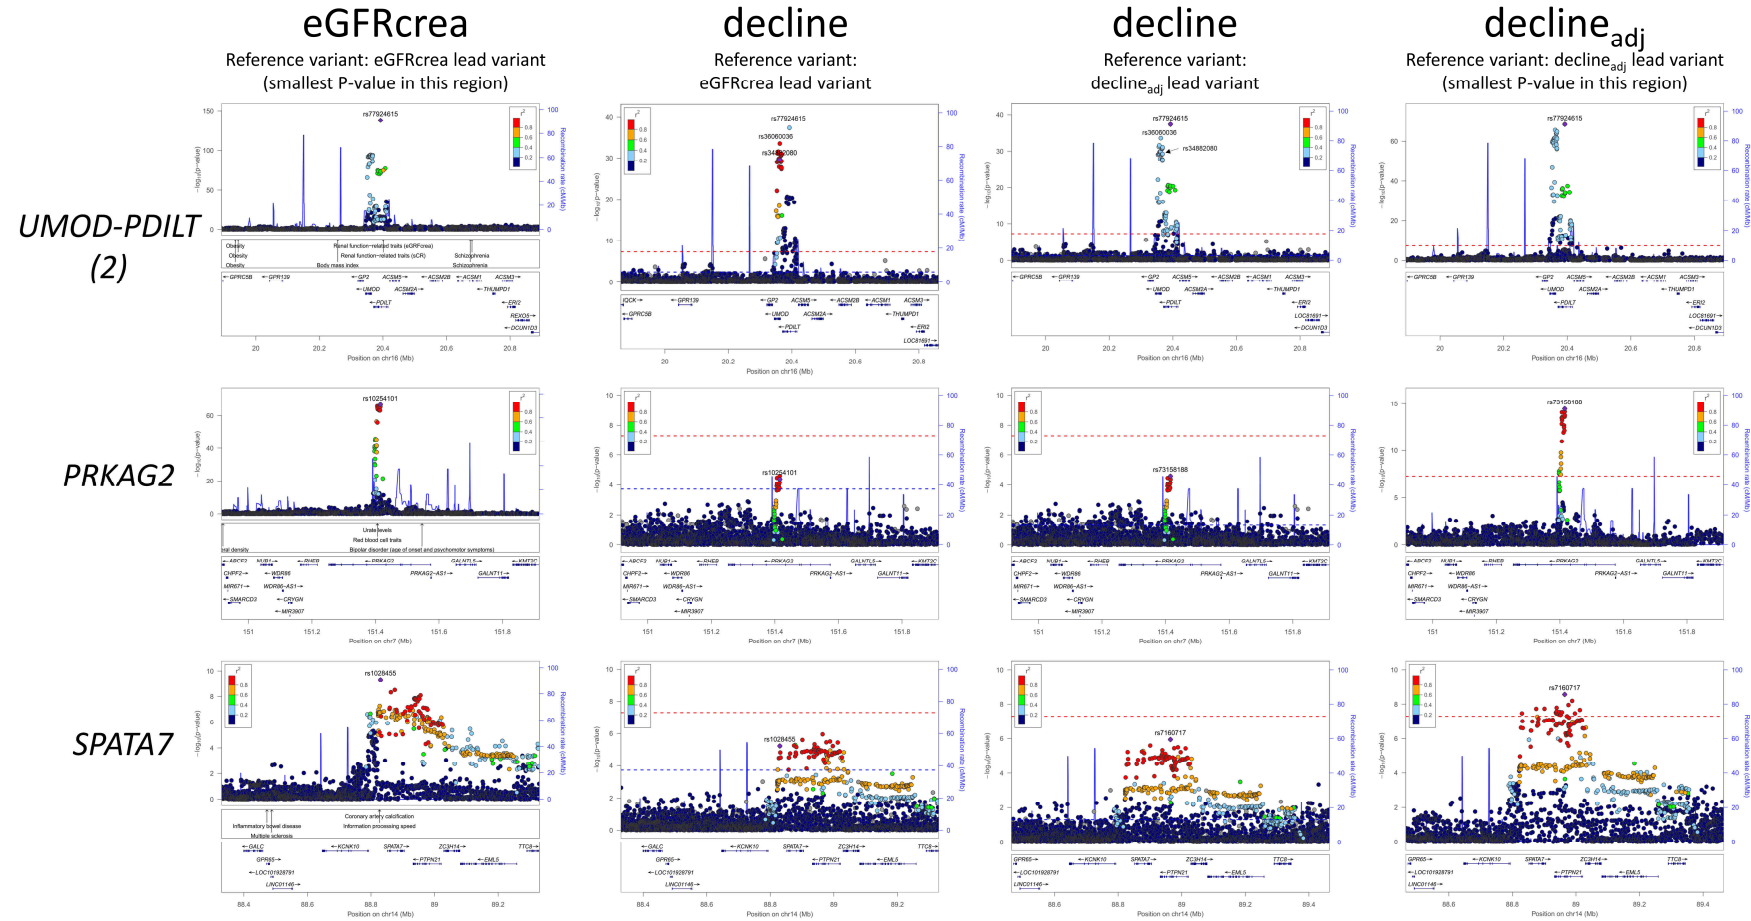

**Supplementary Figure S5B: Regions of the 5 variants in 5 loci identified from GWAS for eGFR-decline adjusted for eGFR-baseline with significant association for eGFR-decline unadjusted for eGFR-baseline.** Shown are regional association plots (1<sup>st</sup> column) for cross-sectional eGFR<sup>S12</sup> (“eGFR<sub>crea</sub>”, n up to 765,348), (2<sup>nd</sup> and 3<sup>rd</sup> column) for eGFR-decline unadjusted for eGFR-baseline (“decline”; n up to 343,339; blue dashed line  $P=0.05/263=1.90 \times 10^{-4}$  in 2<sup>nd</sup> column and  $P=0.05$  in 3<sup>rd</sup> column), and (4<sup>th</sup> column) for eGFR-decline adjusted for eGFR-baseline (“decline<sub>adj</sub>”; n up to 320,737). Highlighted are lead variants for cross-sectional eGFR<sup>S12</sup> (1<sup>st</sup> and 2<sup>nd</sup> column; for *C15ORF54*, using the 2<sup>nd</sup> signal lead variant) or the decline<sub>adj</sub> lead variant (3<sup>rd</sup> and 4<sup>th</sup> column). Red lines indicate  $P=5.00 \times 10^{-8}$ . Signals for decline<sub>adj</sub> coincide with signals for cross-sectional eGFR.

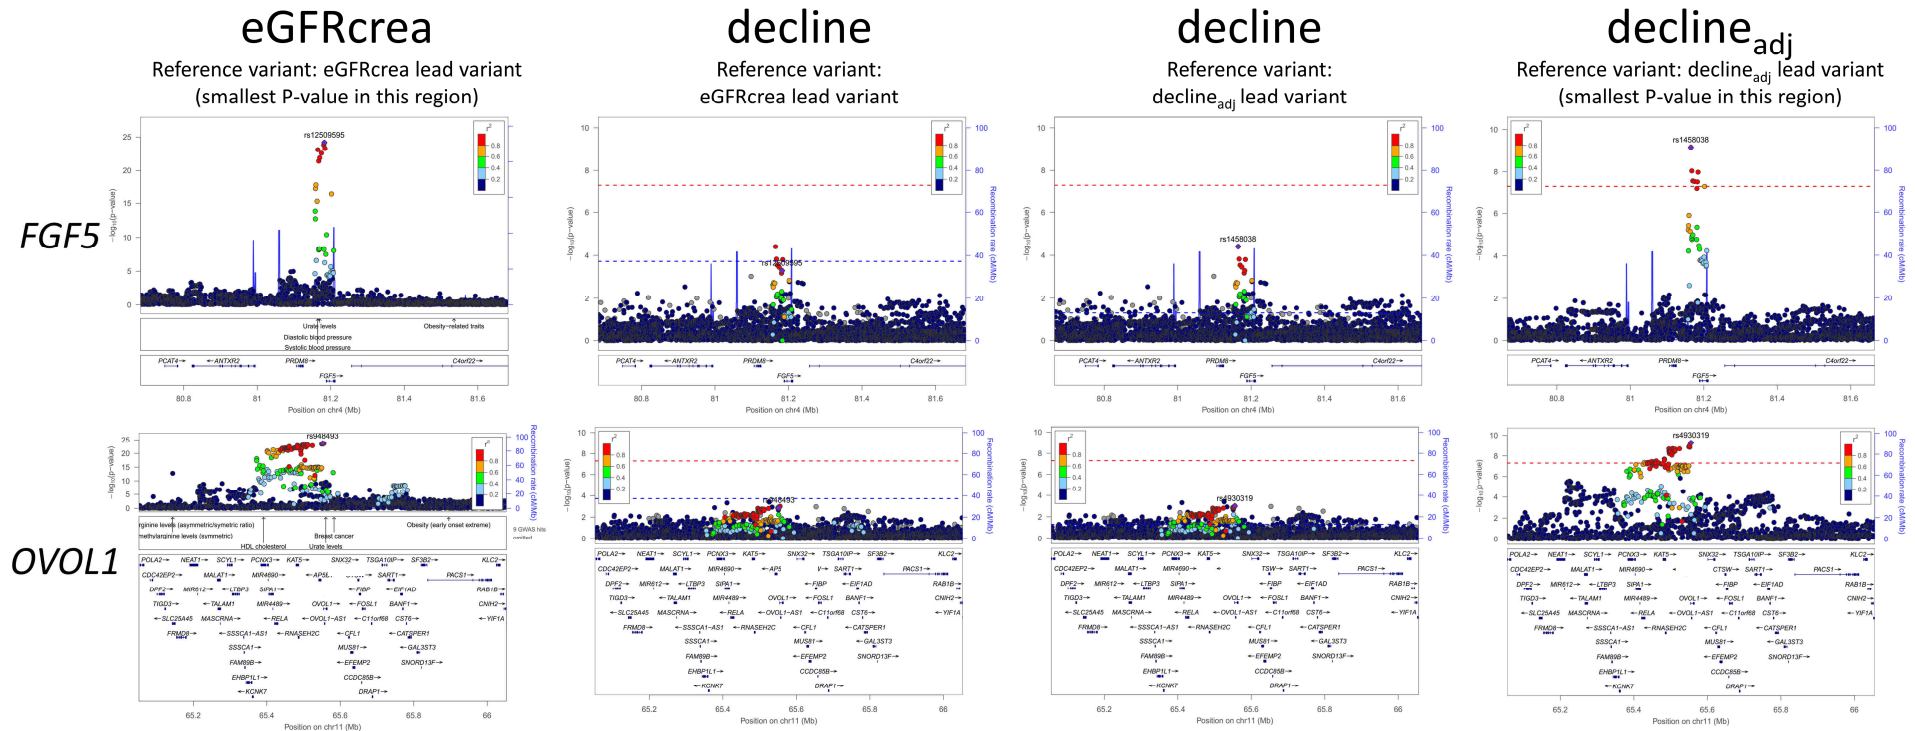

Supplementary Figure S5B (continued)

eGFRcrea

Reference variant: eGFRcrea lead variant  
(smallest P-value in this region)

decline

Reference variant:  
eGFRcrea lead variant

decline

Reference variant:  
decline<sub>adj</sub> lead variant

decline<sub>adj</sub>

Reference variant: decline<sub>adj</sub> lead variant  
(smallest P-value in this region)

TPPP

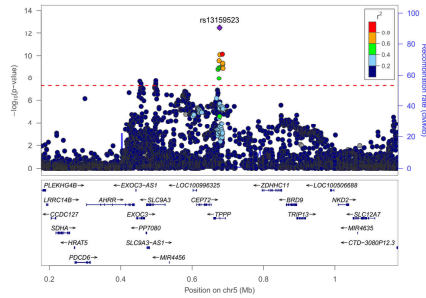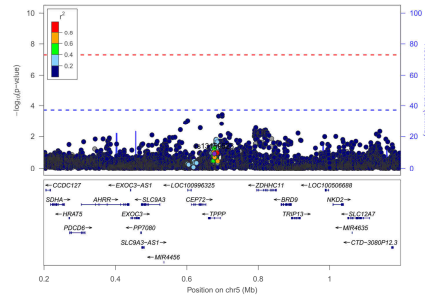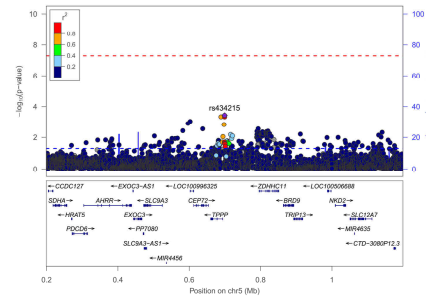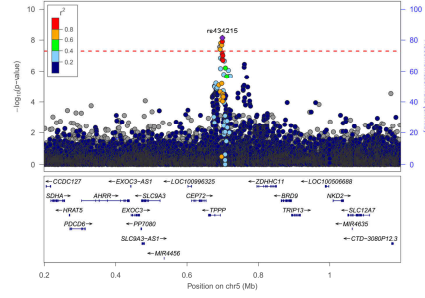

C15ORF54

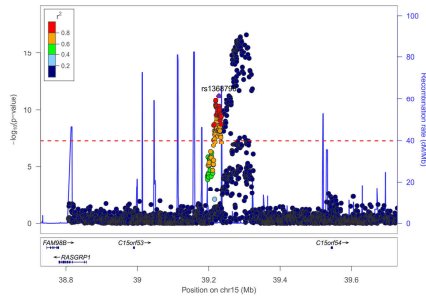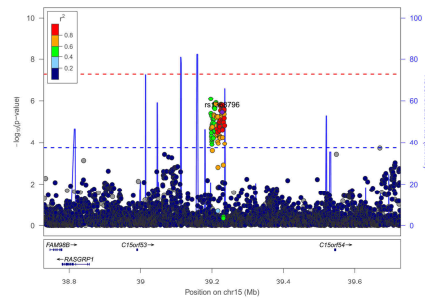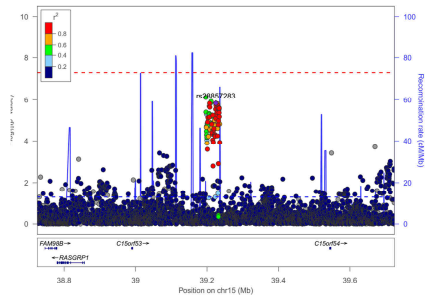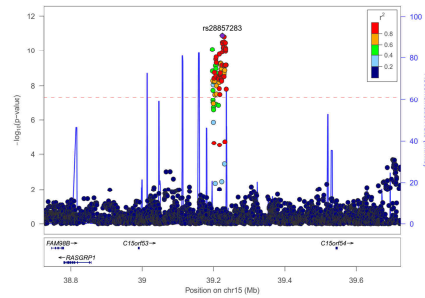

ACVR2B

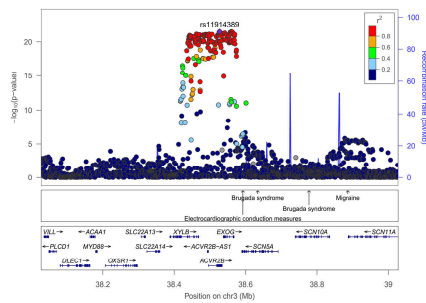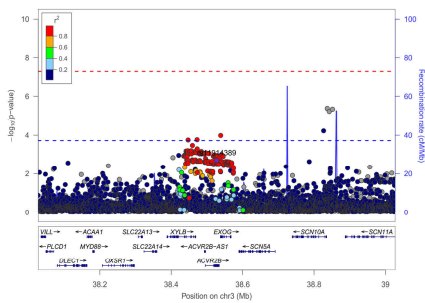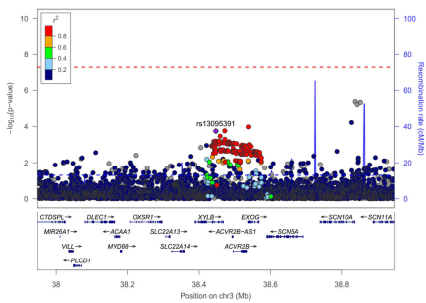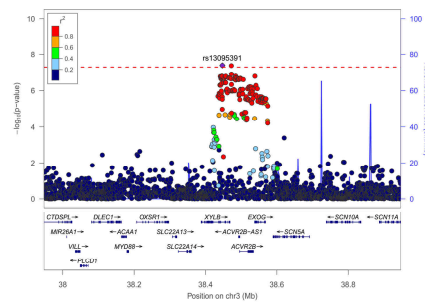

**Supplementary Figure S5C: Regions of the 3 variants in 3 loci identified from GWAS for eGFR-decline adjusted for eGFR-baseline without significant association for eGFR-decline unadjusted for eGFR-baseline.** Shown are regional association plots (1<sup>st</sup> column) for cross-sectional eGFR<sup>S12</sup> (“eGFR<sub>crea</sub>”, n up to 765,348), (2<sup>nd</sup> and 3<sup>rd</sup> column) for eGFR-decline unadjusted for eGFR-baseline (“decline”; n up to 343,339; blue dashed line  $P=0.05/263=1.90 \times 10^{-4}$  in 2<sup>nd</sup> column and  $P=0.05$  in 3<sup>rd</sup> column), and (4<sup>th</sup> column) for eGFR-decline adjusted for eGFR-baseline (“decline<sub>adj</sub>”; n up to 320,737). Highlighted are lead variants for cross-sectional eGFR<sup>S12</sup> (1<sup>st</sup> and 2 column) and decline<sub>adj</sub> lead variants (3<sup>rd</sup> and 4<sup>th</sup> column). Red lines indicate  $P=5.00 \times 10^{-8}$ . Signals for decline<sub>adj</sub> coincide with signals for cross-sectional eGFR; there is no association for decline (unadjusted) in these regions.

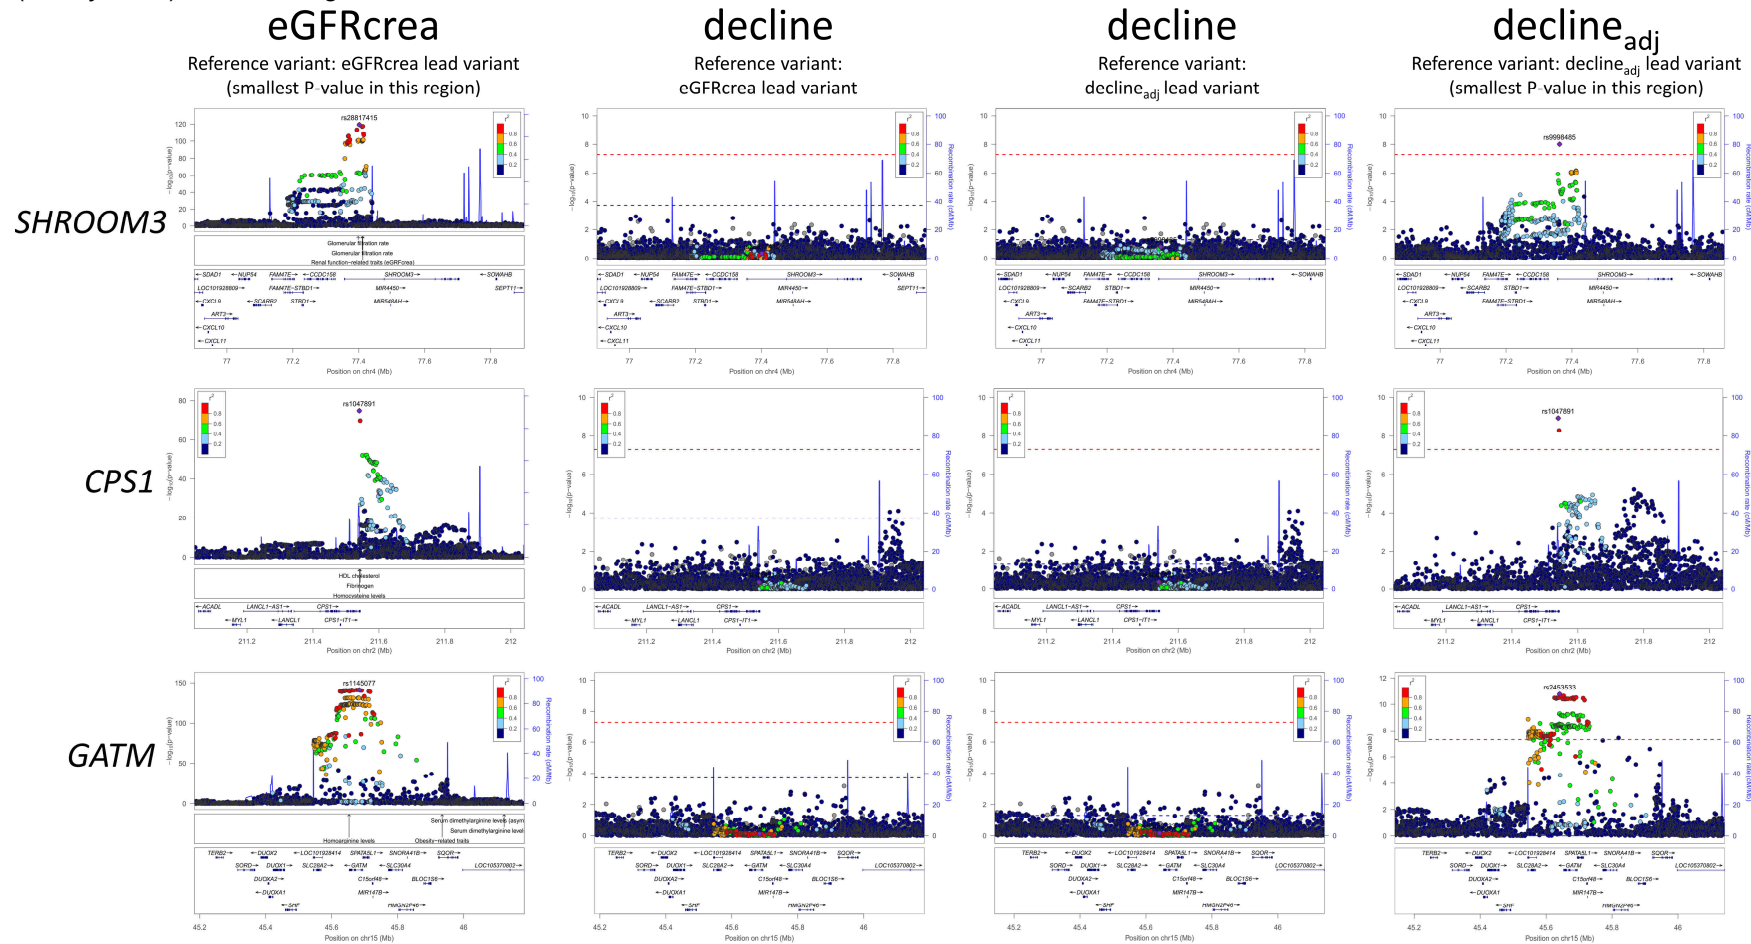



**Supplementary Figure S6: Age-dependency of cross-sectional eGFR and age-dependency of SNP-effects on cross-sectional eGFR in UK Biobank.** We conducted SNP-by-age interaction analyses on cross-sectional eGFR<sub>crea</sub> and eGFR<sub>cys</sub> in individuals from UK Biobank that were independent from the GWAS (n=351,462; i.e. excluding the 15,442 individuals in the eGFR-decline GWAS) using linear regression with covariates sex, age, SNP, SNP-by-age and outcome eGFR<sub>crea</sub> or eGFR<sub>cys</sub>. The SNP-effect was modelled as linear dosage effect (for main effect and in interaction term; i.e. additive genetic effect per allele). Age was centered at 50 years and modelled linearly as well as allowing for a smooth non-linear change by age. For cross-sectional eGFR<sub>crea</sub> (1<sup>st</sup> row) and eGFR<sub>cys</sub> (2<sup>nd</sup> row), we show the age-dependency (**Z**) of the main age effect on eGFR<sub>crea</sub> and eGFR<sub>cys</sub>, (**A**) on the SNP-effects of the 4 variants identified for eGFR-decline (unadjusted for eGFR-baseline), (**B**) on the SNP-effects of the 5 variants identified for eGFR-decline adjusted for eGFR-baseline with significant association for eGFR-decline unadjusted for eGFR-baseline, and (**C**) on the SNP-effects of the 3 variants identified for eGFR-decline adjusted for eGFR-baseline without significant association for eGFR-decline unadjusted for eGFR-baseline. In **A-C**, the main age effect was modelled non-linearly (to avoid residual confounding) and the interaction effects modelling the age-dependency of the SNP-effect linearly (green lines) are the ones reported in **Table 3**.

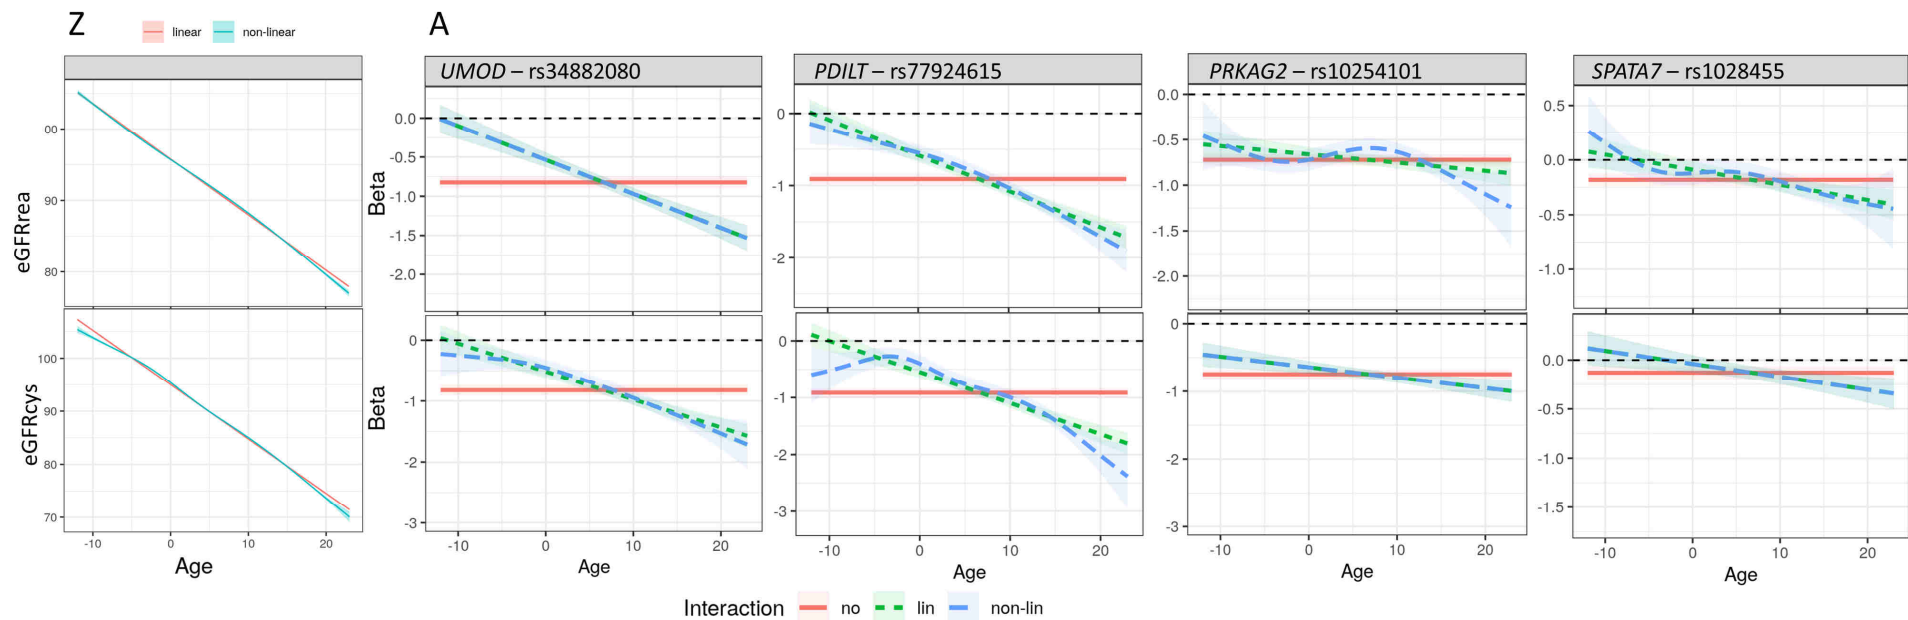

Supplementary Figure S6 (continued)

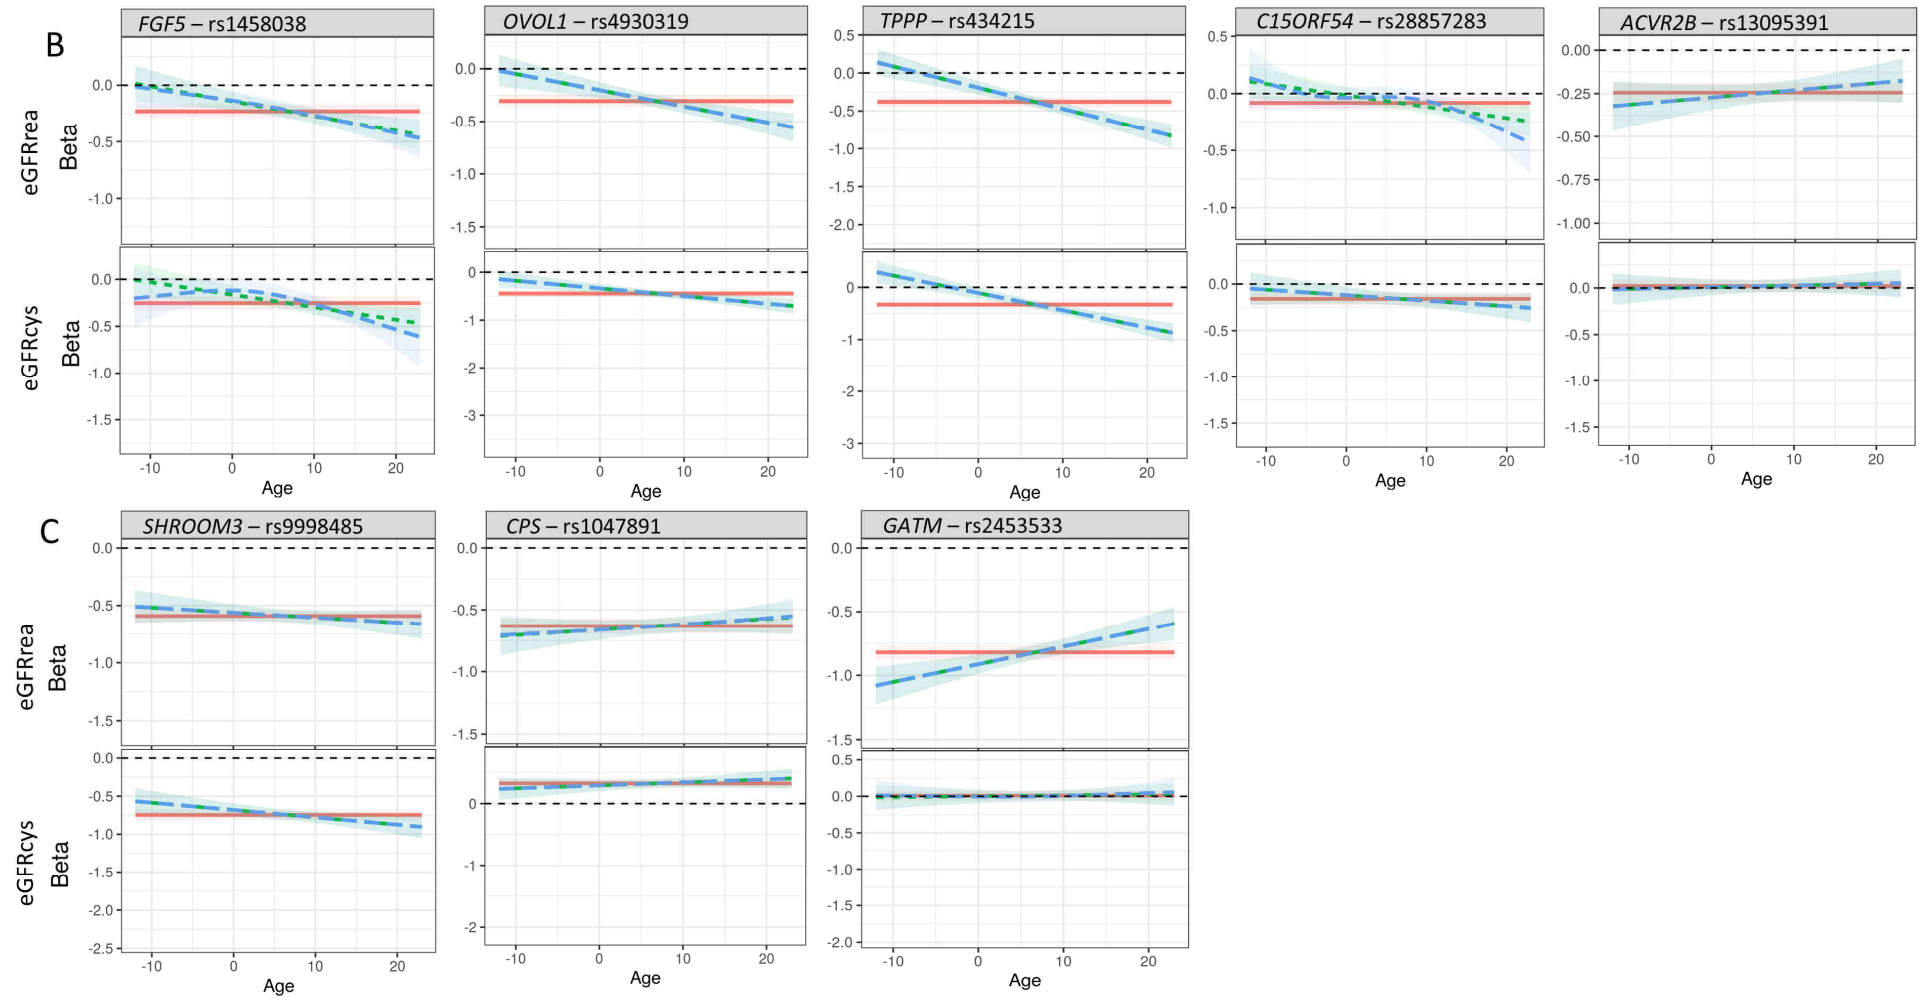

| Supplementary Table S1: Description of participating studies: study design |                                                                                                                                                |          |                             |                                                                                                                                                                                                                                                                                                               |                                                      |                                                                                                                                                                                                                                                                                                       |
|----------------------------------------------------------------------------|------------------------------------------------------------------------------------------------------------------------------------------------|----------|-----------------------------|---------------------------------------------------------------------------------------------------------------------------------------------------------------------------------------------------------------------------------------------------------------------------------------------------------------|------------------------------------------------------|-------------------------------------------------------------------------------------------------------------------------------------------------------------------------------------------------------------------------------------------------------------------------------------------------------|
| Study                                                                      | Full name of the study                                                                                                                         | Subgroup | Ancestry (EA/AA/HIS/EAS/SA) | Study Design (if not population-based, please specify selection and/or enrichment strategy)                                                                                                                                                                                                                   | Important study references, e.g. design paper (PMID) | Serum creatinine assay and year of measurement, baseline                                                                                                                                                                                                                                              |
| ADVANCE                                                                    | Action in Diabetes and Vascular disease: preterAx and diamicroN mr Controlled Evaluation                                                       | 5        | EA                          | factorial, multicentre, randomised controlled trial, with a 5- to 6-year follow-up.                                                                                                                                                                                                                           | 11848259                                             | Jaffe, 2001-2003                                                                                                                                                                                                                                                                                      |
|                                                                            |                                                                                                                                                | 6        | EA                          |                                                                                                                                                                                                                                                                                                               |                                                      |                                                                                                                                                                                                                                                                                                       |
|                                                                            |                                                                                                                                                | UKB      | EA                          |                                                                                                                                                                                                                                                                                                               |                                                      |                                                                                                                                                                                                                                                                                                       |
| AFTER EU                                                                   | AFTER (EURAGEDIC) European Rational Approach for the Genetics of Diabetic Complications                                                        |          | EA                          | Adult onset Type 1 Diabetes                                                                                                                                                                                                                                                                                   | 18496510, 20357380                                   | Modified Jaffe                                                                                                                                                                                                                                                                                        |
| Amish                                                                      | Amish Studies                                                                                                                                  |          | EA                          | Population based "founder" cohort                                                                                                                                                                                                                                                                             | 18440328, 26374108, 15621217                         | Modified kinetic Jaffe reaction                                                                                                                                                                                                                                                                       |
| ARIC                                                                       | Atherosclerosis Risk in Communities study                                                                                                      | AA       | AA                          | Population-based                                                                                                                                                                                                                                                                                              | 2646917                                              | Modified kinetic Jaffé reaction, 1989                                                                                                                                                                                                                                                                 |
|                                                                            |                                                                                                                                                | EA       | EA                          |                                                                                                                                                                                                                                                                                                               |                                                      |                                                                                                                                                                                                                                                                                                       |
| ASPS                                                                       | Austrian Stroke Prevention Study                                                                                                               |          | EA                          | Population-based                                                                                                                                                                                                                                                                                              | 10408549, 7800110                                    | Modified kinetic Jaffé reaction, 1991 - 2005                                                                                                                                                                                                                                                          |
| ASPS-Fam                                                                   | Austrian Stroke Prevention Family Study                                                                                                        |          | EA                          | Family-based                                                                                                                                                                                                                                                                                                  | 25309438, 25443291                                   | Modified kinetic Jaffe reaction, 2006 - 2012                                                                                                                                                                                                                                                          |
| BioMe                                                                      | BioMe™ BioBank Program                                                                                                                         | Omni AA  | AA                          | Population-based                                                                                                                                                                                                                                                                                              | 25349204                                             | Jaffe, 2008                                                                                                                                                                                                                                                                                           |
|                                                                            |                                                                                                                                                | Omni EA  | EA                          |                                                                                                                                                                                                                                                                                                               |                                                      |                                                                                                                                                                                                                                                                                                       |
|                                                                            |                                                                                                                                                | Omni HA  | HIS                         |                                                                                                                                                                                                                                                                                                               |                                                      |                                                                                                                                                                                                                                                                                                       |
| CHS                                                                        | Cardiovascular Health Study                                                                                                                    | AA       | AA                          | Population-based                                                                                                                                                                                                                                                                                              | 1669507                                              | Colorimetric method on a Kodak Ektachem 700 Analyzer (Eastman Kodak, Rochester, NY), 1989-90 and 1992-93                                                                                                                                                                                              |
|                                                                            |                                                                                                                                                | EA       | EA                          |                                                                                                                                                                                                                                                                                                               |                                                      |                                                                                                                                                                                                                                                                                                       |
| Cilento                                                                    | Cilento Study                                                                                                                                  |          | EA                          | Population-based, Isolated Population Study                                                                                                                                                                                                                                                                   | 17476112, 19550436                                   | Jaffe, 2005                                                                                                                                                                                                                                                                                           |
| DECODE                                                                     | deCODE genetics/Amgen                                                                                                                          |          | EA                          | Population-based                                                                                                                                                                                                                                                                                              | 20686651, 25082825                                   | Enzymatic and modified kinetic Jaffe reaction assay since 1997                                                                                                                                                                                                                                        |
| DIACORE                                                                    | DIAbetes COhoRtE                                                                                                                               |          | EA                          | Prospective cohort study of patients with diabetes mellitus type 2                                                                                                                                                                                                                                            | 23409726                                             | Serum Creatinine was measured 2010-2013 using an enzymatic assay traceable to NIST.                                                                                                                                                                                                                   |
| ESTHER                                                                     | Epidemiological investigation of the chances of preventing, recognizing early and optimally treating chronic diseases in an elderly population |          | EA                          | Population-based                                                                                                                                                                                                                                                                                              | 23446902, 15578318                                   | Kinetic Jaffe-method, 2000 - 2002                                                                                                                                                                                                                                                                     |
| FHS                                                                        | The Framingham Heart Study                                                                                                                     |          | EA                          | Community- and family-based                                                                                                                                                                                                                                                                                   | 5921755, 1208363, 17372189                           | Modified Jaffe method                                                                                                                                                                                                                                                                                 |
| FINCAVAS                                                                   | The Finnish Cardiovascular Study                                                                                                               |          | EA                          | Fincavas follow-up cohort of consecutive patients undergoing exercise stress test                                                                                                                                                                                                                             | 16515696                                             | Enzymatic photometric, 1992-2015                                                                                                                                                                                                                                                                      |
| GCKD                                                                       | German Chronic Kidney Disease study                                                                                                            |          | EA                          | Included are European ancestry CKD patients aged 18-74 years with an eGFR between 30–60 mL/min per 1.73 m2 or an eGFR >60 mL/min per 1.73 m2 and a urinary albumin-to-creatinine ratio (UACR) >300 mg/g, albuminuria >300 mg/day, a urinary protein-to-creatinine ratio >500 mg/g, or proteinuria >500 mg/day | 21862458, 25271006                                   | Serum creatinine was measured using the Ceratinine plus enzymatic assay (Roche) on a Modular (P) analyzer in 2012                                                                                                                                                                                     |
| Geisinger Research (MyCode)                                                | MyCode Community Health Initiative                                                                                                             |          | EA                          | Population-based                                                                                                                                                                                                                                                                                              | 26866580                                             | Enzymatic method done by Roche Cobas instruments, 1996+                                                                                                                                                                                                                                               |
| HANDLS                                                                     | Healthy Aging in Neighborhoods of Diversity across the Life Span study                                                                         |          | AA                          | Population-based prospective longitudinal study                                                                                                                                                                                                                                                               | 20828101                                             | Modified Jaffe 2004-2009                                                                                                                                                                                                                                                                              |
| HYPERGENES                                                                 | Hypergenes - European Network for Genetic-Epidemiological Studies                                                                              | controls | EA                          | Case-control for Hypertension                                                                                                                                                                                                                                                                                 | 22184326                                             | Jaffe assay 2002                                                                                                                                                                                                                                                                                      |
| Jackson Heart Study (JHS)                                                  | Jackson Heart Study                                                                                                                            |          | AA                          | Community and family-based                                                                                                                                                                                                                                                                                    | 16320381                                             | IDMS calibrated serum creatinine was used from visit 1 and visit 3... creatinine measurements were made from 2000 on but calibration to the same standard was done in 2015 (see PMID: 25806862 for a full description).                                                                               |
| JMICC                                                                      | Japan Multi-institutional Collaborative Cohort (J-MICC) Study                                                                                  |          | EAS                         | Population-based                                                                                                                                                                                                                                                                                              | 17696755, 32963210                                   | Enzymatic method, 2007-2010                                                                                                                                                                                                                                                                           |
| KORA                                                                       | Cooperative Health Research in the Augsburg Region                                                                                             | F3       | EA                          | Population-based                                                                                                                                                                                                                                                                                              | 16032514                                             | Modified kinetic Jaffe reaction, 1994                                                                                                                                                                                                                                                                 |
|                                                                            |                                                                                                                                                | F4       | EA                          |                                                                                                                                                                                                                                                                                                               |                                                      |                                                                                                                                                                                                                                                                                                       |
| Lifelines                                                                  | Lifelines Cohort Study                                                                                                                         |          | EA                          | Population-based                                                                                                                                                                                                                                                                                              | 18075776, 25502107, 26333164                         | Enzymatic, IDMS traceable, Roche (Modular); 2006-2013                                                                                                                                                                                                                                                 |
| MDC-CC                                                                     | Malmö Diet and Cancer Study-Cardiovascular Cohort                                                                                              |          | EA                          | Population-based                                                                                                                                                                                                                                                                                              | 11916347                                             | Jaffé method and the IDMS-traceable standard was used                                                                                                                                                                                                                                                 |
| MESA                                                                       | Multi-Ethnic Study of Atherosclerosis                                                                                                          | AFR      | AA                          | Population-based without CVD                                                                                                                                                                                                                                                                                  | 12397006                                             | Baseline is year 2002, exam 2 2004, exam 3 2005 and exam 4 2007. All assays rate relectance spectrophotometry using thin film adaptation of the creatine aminohydrolase method on the Vitros analyzer (Johnson and Johnson Clinical Diagnostocs)                                                      |
|                                                                            |                                                                                                                                                | EAS      | EAS                         |                                                                                                                                                                                                                                                                                                               |                                                      |                                                                                                                                                                                                                                                                                                       |
|                                                                            |                                                                                                                                                | EUR      | EA                          |                                                                                                                                                                                                                                                                                                               |                                                      |                                                                                                                                                                                                                                                                                                       |
|                                                                            |                                                                                                                                                | HIS      | HIS                         |                                                                                                                                                                                                                                                                                                               |                                                      |                                                                                                                                                                                                                                                                                                       |
| METSIM                                                                     | Metabolic Syndrome in Men study                                                                                                                |          | EA                          | Population-based                                                                                                                                                                                                                                                                                              | 28119442                                             | Kinetic Jaffé method, 2005-2010                                                                                                                                                                                                                                                                       |
| NESDA                                                                      | Netherlands Study of Depression and Anxiety                                                                                                    |          | EA                          | Population-based, predominantly cases with major depression                                                                                                                                                                                                                                                   | 18763692                                             | Partly Jaffe, partly enzymatic; 2004-2007                                                                                                                                                                                                                                                             |
| OGP                                                                        | Ogliastra Genetic Park Study                                                                                                                   |          | EA                          | Population-based                                                                                                                                                                                                                                                                                              | 20823129                                             | Colorimetric method Jaffé without deproteinization (Biotechnica instruments).Creatinine forms a colored orange-red complex in an alkaline picrate solution. The difference in absorbance at fixed times during conversion is proportional to the concentration of creatinine in the sample. 2005-2008 |
| PIVUS                                                                      | Prospective Investigation of Vasculature in Uppsala Seniors                                                                                    |          | EA                          | Population-based                                                                                                                                                                                                                                                                                              | 16141402                                             | Kinetic jaffe method                                                                                                                                                                                                                                                                                  |
| POPGEN                                                                     | POPGEN control sample                                                                                                                          |          | EA                          | Population-based                                                                                                                                                                                                                                                                                              | 16490960                                             | Serum creatinine was measured 2005-2008 using an enzymatic assay                                                                                                                                                                                                                                      |
| PREVEND                                                                    | Prevention of Renal and Vascular End-stage Disease study                                                                                       |          | EA                          | Population-based                                                                                                                                                                                                                                                                                              | 12356629                                             | An isotope dilution mass spectrometry (IDMS) traceable enzymatic method on a Roche Modular analyzer using reagents and calibra- tors from Roche (Roche Diagnostics, Mannheim, Germany) '97-'98                                                                                                        |
| RS                                                                         | Rotterdam Study                                                                                                                                | I        | EA                          | Population-based                                                                                                                                                                                                                                                                                              | 29064009                                             | Enzymatic assay, 1999<br>Enzymatic assay, 2000<br>Enzymatic assay, 2006                                                                                                                                                                                                                               |
|                                                                            |                                                                                                                                                | II       | EA                          |                                                                                                                                                                                                                                                                                                               |                                                      |                                                                                                                                                                                                                                                                                                       |
|                                                                            |                                                                                                                                                | III      | EA                          |                                                                                                                                                                                                                                                                                                               |                                                      |                                                                                                                                                                                                                                                                                                       |
| SHIP                                                                       | Study of Health in Pomerania                                                                                                                   | I        | EA                          | Population-based                                                                                                                                                                                                                                                                                              | 20167617                                             | Jaffe, 2002                                                                                                                                                                                                                                                                                           |
| SIMES                                                                      | Singapore Malay Eye Study                                                                                                                      |          | EAS                         | Population-based                                                                                                                                                                                                                                                                                              | 17365815, 21490949                                   | Jaffe, 2004-2007                                                                                                                                                                                                                                                                                      |
| SINDI                                                                      | Singapore Indian Eye Study                                                                                                                     |          | EAS                         | Population-based                                                                                                                                                                                                                                                                                              | 19995197, 24244560                                   | Jaffe, 2007-2009                                                                                                                                                                                                                                                                                      |
| SOLID-TIMI 52                                                              | SOLID-TIMI 52                                                                                                                                  | EA       | EA                          | Clinical trial                                                                                                                                                                                                                                                                                                | 21982651                                             | Jaffe, 2010                                                                                                                                                                                                                                                                                           |
|                                                                            |                                                                                                                                                | EAS      | EAS                         |                                                                                                                                                                                                                                                                                                               |                                                      |                                                                                                                                                                                                                                                                                                       |
|                                                                            |                                                                                                                                                | SA       | SA                          |                                                                                                                                                                                                                                                                                                               |                                                      |                                                                                                                                                                                                                                                                                                       |
|                                                                            |                                                                                                                                                |          |                             |                                                                                                                                                                                                                                                                                                               |                                                      |                                                                                                                                                                                                                                                                                                       |

|            |                                                                             |       |     |                                                                   |                    |                                                                                                                                                           |
|------------|-----------------------------------------------------------------------------|-------|-----|-------------------------------------------------------------------|--------------------|-----------------------------------------------------------------------------------------------------------------------------------------------------------|
| STABILITY  | Stabilization of Atherosclerotic plaque By Initiation of darapLadlb TherapY | EA    | EA  | Clinical trial                                                    | 24678955, 20934559 | Jaffe, 2009                                                                                                                                               |
|            |                                                                             | EAS   | EAS |                                                                   |                    |                                                                                                                                                           |
|            |                                                                             | SA    | SA  |                                                                   |                    |                                                                                                                                                           |
| ULSAM      | Uppsala study of adult men                                                  |       | EA  | Population-based                                                  | 21335440           | Kinetic jaffe method                                                                                                                                      |
| Vanderbilt | Vanderbilt BioVU                                                            | 660   | EA  | Population-based with enrichment for a variety of disease studies | 18500243           | Extracted from clinical records                                                                                                                           |
|            |                                                                             | AA1M  | AA  |                                                                   |                    |                                                                                                                                                           |
|            |                                                                             | Omni1 | EA  |                                                                   |                    |                                                                                                                                                           |
|            |                                                                             | Omni5 | EA  |                                                                   |                    |                                                                                                                                                           |
| YFS        | The Young Finns Study                                                       |       | EA  | Population-based                                                  | 18263651, 23069987 | Serum creatinine was determined spectrophotometrically by the Jaffé method (picric acid; Olympus Diagnostica GmbH) from frozen plasma samples. Year 2001. |
| AugUR      | The German AugUR study                                                      |       | EA  | Prospective cohort study in the elderly                           | 26489512           | Serum Creatinine was determined on a enzymatic Siemens-Kit ECREA, 2018                                                                                    |
| HUNT       | Trøndelag Health Study, Norway                                              |       | EA  | Population-based                                                  | 22879362           | Modified kinetic Jaffé reaction, 1995-1997                                                                                                                |
| MGI        | Michigan Genomics Initiative                                                |       | EA  | Hospital-based                                                    |                    | Jaffe, variable year of measurement                                                                                                                       |
| UKBB       | Uk Biobank                                                                  |       | EA  | Population-based                                                  | 25826379           | Enzymatic analysis on a beckman Coulter AU5800                                                                                                            |

AA: African American ancestry; EA: European ancestry; HIS: Hispanics; SA: South Asian ancestry; EAS: East Asian ancestry

| Supplementary Table S2: Description of participating studies: genotyping and imputation |                                                                                                                                                                                                                                                                                                                                                                                                                                                                                                 |                                                                                                                                                                                           |                                     |                                                                                                                                                                                                                                       |                                                                              |                                 |                                                   |                                                                                                                  |                                                                                                                                                                                                                 |                                      |                                                                                                                                    |                                          |
|-----------------------------------------------------------------------------------------|-------------------------------------------------------------------------------------------------------------------------------------------------------------------------------------------------------------------------------------------------------------------------------------------------------------------------------------------------------------------------------------------------------------------------------------------------------------------------------------------------|-------------------------------------------------------------------------------------------------------------------------------------------------------------------------------------------|-------------------------------------|---------------------------------------------------------------------------------------------------------------------------------------------------------------------------------------------------------------------------------------|------------------------------------------------------------------------------|---------------------------------|---------------------------------------------------|------------------------------------------------------------------------------------------------------------------|-----------------------------------------------------------------------------------------------------------------------------------------------------------------------------------------------------------------|--------------------------------------|------------------------------------------------------------------------------------------------------------------------------------|------------------------------------------|
| Study                                                                                   | Exclusions prior to genotyping and/or genotyping                                                                                                                                                                                                                                                                                                                                                                                                                                                | Genotyping Array                                                                                                                                                                          | Genotype calling                    | QC filters for genotyped SNPs used for imputation                                                                                                                                                                                     | No of SNPs used for imputation                                               | Pre-phasing software            | Imputation                                        | Imputation reference panel                                                                                       | Filtering of imputed genotypes                                                                                                                                                                                  | Software used for GWAS <sup>3</sup>  | Handling of population stratification                                                                                              | Type of reported imputation quality      |
| ADVANCE                                                                                 | Ethnic outliers, sex mismatches, call rate < 95%                                                                                                                                                                                                                                                                                                                                                                                                                                                | Affymetrix 5.0, Affymetrix 6.0, Affymetrix UKB                                                                                                                                            | Affymetrix power tools 1.17.0       | avg_het <23% or >30%; call rate <97%; MAF <1%; snp call rate <95%; HWE <0.001;                                                                                                                                                        | Affymetrix 5.0 : 363,062; Affymetrix 6.0 : 702,628; Affymetrix UKB : 759,238 | ShapelT2                        | Impute2                                           | 1000 Genomes Project Phase 3 Version 5                                                                           | MAF<0.005; info score<0.3                                                                                                                                                                                       | PLINK 1.9.0 beta                     | PC1-PC2                                                                                                                            | Info Score                               |
| AFTER EU                                                                                | sample call rate <98%, extreme heterozygosity, sex mismatches, non-European ancestry, cryptic relatedness, duplicates                                                                                                                                                                                                                                                                                                                                                                           | Illumina HumanCore Exome v1.0v1.1                                                                                                                                                         | Illumina Genome Studio              | Call Rate <=95%, HWE Filter 10e-06, INDELS removed, non 1KG variants removed, 40% MAF difference with 1000G, Duplicate SNPs                                                                                                           | 318,207                                                                      | ShapelT2                        | Minimac3                                          | 1000 Genomes Project Phase 3 Version 5 (updated on Oct 20, 2015)                                                 | none                                                                                                                                                                                                            | EPACTS                               | PC1-PC5                                                                                                                            | r <sup>2</sup>                           |
| Amish                                                                                   | age <18, severe chronic disease, call rate <95%, pHWE<10E-6                                                                                                                                                                                                                                                                                                                                                                                                                                     | Affymetrix 500K and 6.0                                                                                                                                                                   | BRLMM                               | Sample call rate <95%, pHWE<5E-6, MAF <0.01                                                                                                                                                                                           | 397,704                                                                      | ShapelT2                        | Impute2                                           | 1000 Genomes Project Phase 1 Release Version 3 ALL (March 2012)                                                  | none                                                                                                                                                                                                            | MMAP                                 | NA                                                                                                                                 | Info Score                               |
| ARIC EA                                                                                 | Of the 9713 genotyped individuals of European ancestry, we excluded 658 individuals based on discrepancies with previous genotypes, disagreement between reported and genotypic sex, one randomly selected member of a pair of first-degree relatives, or outlier based on measures of average DST or >8 SD away on any of the first 10 principal components.                                                                                                                                   | Affymetrix 6.0                                                                                                                                                                            | Birdseed                            | call rate <95%, MAF<0.5%, pHWE<10e-5                                                                                                                                                                                                  | 682,749                                                                      | ShapelT2                        | Impute2                                           | 1000 Genomes Project Phase 1 Release Version 3 ALL (March 2012)                                                  | none                                                                                                                                                                                                            | SNPTEST v2                           | PC1-PC10                                                                                                                           | Info Score                               |
| ARIC AA                                                                                 | Of the 3,207 genotyped individuals of African ancestry, we excluded 336 individuals based on discrepancies with previous genotypes, disagreement between reported and genotypic sex, one randomly selected member of a pair of first-degree relatives, or outlier based on measures of average DST or >6 SD away on any of the first 10 principal components.                                                                                                                                   | Affymetrix 6.0                                                                                                                                                                            | Birdseed                            | call rate <95%, MAF<1%, pHWE<10e-5                                                                                                                                                                                                    | 773,317                                                                      | ShapelT2                        | Impute2                                           | 1000 Genomes Project Phase 1 Release Version 3 ALL (March 2012)                                                  | none                                                                                                                                                                                                            | SNPTEST v2                           | PC1-PC10                                                                                                                           | Info Score                               |
| ASPS                                                                                    | Ethnic outliers; duplicates; gender mismatch; cryptic relatedness; sample call rate < 98%; excess heterozygosity                                                                                                                                                                                                                                                                                                                                                                                | Illumina Human610-Quad BeadChip                                                                                                                                                           | Illumina                            | call rate < 98 %; MAF < 1 % ; pHWE < 5x10-6                                                                                                                                                                                           | 566,930                                                                      | ShapelT2                        | Impute2                                           | 1000 Genomes Project Phase 1 Release Version 3 ALL (March 2012)                                                  | none                                                                                                                                                                                                            | EPACTS (v3.2.6)                      | PC1-PC4                                                                                                                            | Info Score                               |
| ASPS-Fam                                                                                | Ethnic outliers; duplicates; gender mismatch; cryptic relatedness; sample call rate < 98%; excess heterozygosity                                                                                                                                                                                                                                                                                                                                                                                | Affymetrix Genome-Wide Human SNP Array 6.0                                                                                                                                                | Birdseed v2                         | call rate < 98 %;MAF < 5%;pHWE < 1x10-6                                                                                                                                                                                               | 501,288                                                                      | ShapelT2                        | Impute2                                           | 1000 Genomes Project Phase 1 Release Version 3 ALL (March 2012)                                                  | none                                                                                                                                                                                                            | EPACTS (v3.2.6)                      | PC1-PC4                                                                                                                            | Info Score                               |
| BioMe                                                                                   | none                                                                                                                                                                                                                                                                                                                                                                                                                                                                                            | Illumina HumanOmniExpressExome-8 v1.0                                                                                                                                                     | BeadStudio                          | Removed samples:<br>1. Sample call rate: < 98%<br>2. Heterozygosity: coefficient < -0.1 or > 0.3 for common variants (MAF>1%)<br>3. inbreeding coefficient < 0.4 or > 0.9 for rare variants (MAF<1%)<br>4. MAF = 0<br>5. HWE < 1x10-5 | AA/HIS: 828,109<br>EA: 688,734                                               | AA/HIS: ShapelT2<br>EA: minimac | AA/HIS: IMPUTE2<br>EA: Michigan Imputation Server | AA/HIS: 1000 Genomes Project Phase 1 Release Version 3<br>EA: Haplotype Reference Consortium 1.1                 | none                                                                                                                                                                                                            | EPACTS-3.2.6-patched                 | PC1-PC8                                                                                                                            | AA/HIS: Info Score<br>EA: r <sup>2</sup> |
| CHS AA                                                                                  | Beyond laboratory genotyping failures, participants were excluded if they had a call rate<95% or if their genotype was discordant with known sex or prior genotyping (to identify possible sample swaps).                                                                                                                                                                                                                                                                                       | Illumina HumanOmni1-Quad_v1 BeadChip                                                                                                                                                      | Illumina GenomeStudio               | call rate < 97%, HWE P < 10-5, > 1 duplicate error or Mendelian inconsistency (for reference CEPH trios), heterozygote frequency = 0                                                                                                  | 940,567                                                                      | no pre-phasing                  | Impute2                                           | 1000 Genomes Project Phase 3                                                                                     | Variants with insufficient effective minor alleles are filtered prior to analysis. This threshold was set at 5 effective alleles. Where effective alleles is defined as MAF*sampleN <sup>2</sup> *im pQuality.  | custom R software                    | PC1-PC5                                                                                                                            | r <sup>2</sup>                           |
| CHS EA                                                                                  | European ancestry participants were excluded from the GWAS study sample due to the presence at study baseline of coronary heart disease, congestive heart failure, peripheral vascular disease, valvular heart disease, stroke or transient ischemic attack or lack of available DNA. Beyond laboratory genotyping failures, participants were excluded if they had a call rate<95% or if their genotype was discordant with known sex or prior genotyping (to identify possible sample swaps). | Illumina 370CNV BeadChip                                                                                                                                                                  | Illumina BeadStudio                 | call rate < 97%, HWE P < 10-5, > 2 duplicate errors or Mendelian inconsistencies (for reference CEPH trios), heterozygote frequency = 0, SNP not found in HapMap.                                                                     | 359,592                                                                      | MaCH                            | Minimac1                                          | 1000 Genomes Project Phase 3                                                                                     | Variants with insufficient effective minor alleles are filtered prior to analysis. This threshold was set at 10 effective alleles. Where effective alleles is defined as MAF*sampleN <sup>2</sup> *im pQuality. | custom R software                    | PC1-PC5                                                                                                                            | r <sup>2</sup>                           |
| Cilento                                                                                 | Gender mismatch                                                                                                                                                                                                                                                                                                                                                                                                                                                                                 | Illumina 370K (n=859)<br>Illumina OmniExpress (n=758)                                                                                                                                     | Illumina BeadStudio                 | SNPs in common between the two arrays, call rate<95%, MAF<1%.                                                                                                                                                                         | ~190,000                                                                     | Eagle                           | Sanger Imputation Service                         | Haplotype Reference Consortium                                                                                   | none                                                                                                                                                                                                            | EPACTS (fixed version february 2017) | NA                                                                                                                                 | Info Score                               |
| DECODE                                                                                  | Call rate < 97%                                                                                                                                                                                                                                                                                                                                                                                                                                                                                 | The chip-typed samples were assayed with the Illumina HumanHap 300, HumanCNV 370, HumanHap 610, HumanHap 1M, HumanHap 660, Omni-1, Omni 2.5 or Omni Express bead chips at deCODE genetics | GraphType r                         | Yield < 95%, MAF>0.01, HW < 0.001                                                                                                                                                                                                     |                                                                              | Inhouse software                | Inhouse software, similar to IMPUTE               | Icelandic reference panel - variants matched with Haplotype Reference Consortium or 1000 Genomes Project Phase 3 | None                                                                                                                                                                                                            | Inhouse software                     | for quantitative traits: BOLT LMM or variance covariance matrix prop. to the kinship matrix / for binary: adj. for county of birth | Info Score                               |
| DIACORE                                                                                 | all patients included                                                                                                                                                                                                                                                                                                                                                                                                                                                                           | Axiom UK Biobank Array                                                                                                                                                                    | Axiom GT1 in Genotyping Console 4.0 | 1) Missing phenotype<br>2) Ancestry not European<br>3) Relatedness 2nd degree or closer<br>4) Genetic gender discordant with phenotypic gender<br>5) Gonosomal aberration<br>6) Excess of Heterozygosity<br>7) Low callrate           | 799,756                                                                      | ShapelT2                        | Minimac1                                          | 1000 Genomes Project Phase 3 Version 5                                                                           | none                                                                                                                                                                                                            | epacts 3.2.6                         | PC1-PC10                                                                                                                           | r <sup>2</sup>                           |

|                             |                                                                                                                                                                                                                                                                               |                                                                                     |                         |                                                                                                                                                                                                                                       |                           |           |                            |                                                                  |                                    |                 |                                                                        |                |
|-----------------------------|-------------------------------------------------------------------------------------------------------------------------------------------------------------------------------------------------------------------------------------------------------------------------------|-------------------------------------------------------------------------------------|-------------------------|---------------------------------------------------------------------------------------------------------------------------------------------------------------------------------------------------------------------------------------|---------------------------|-----------|----------------------------|------------------------------------------------------------------|------------------------------------|-----------------|------------------------------------------------------------------------|----------------|
| ESTHER                      | Quality control was performed according to Nat. Protoc. 2010 Sept.; 5(9): 1564-1573. Anderson et al.; Gender mismatch, sample call rate < 97%, removal of duplicated or related samples, removal of ethnic outliers (Germans only remained), MAF 0.01, GENO 0.05, HWE 0.00001 | Illumina Infinium OncoArray-500K BeadChip                                           | GenomeStudio            | MAF < 0.01                                                                                                                                                                                                                            | 368,205                   | ShapelIT  | Impute2                    | 1000 Genomes Project Phase 3 Version 5                           | none                               | SNPTEST v2.5.2  | not required                                                           | Info Score     |
| FHS                         | call rate >97%, sample failures, genotyped sex different from recorded sex, extreme heterozygosity or high Mendelian error rate                                                                                                                                               | Affymetrix GeneChip Human Mapping 500K Array Set® and 50K Human Gene Focused Panel® | Affymetrix BRLMM        | call rate >97%, pHWE ≥ 1E-6, Mishap p ≥ 1e-9, ≤ 100 Mendel errors, MAF ≥ 1%                                                                                                                                                           | 412,053                   | ShapelIT  | MACH                       | 1000 Genomes Project Phase 1 Release Version 3 (March 2012)      | none                               | GWAF            | PCs associated with trait with p < 0.05                                | r <sup>2</sup> |
| FINCAVAS                    | call rates < 95%, pHWE < 1E-6, sex mismatch, MDS outliers, excess heterozygosity                                                                                                                                                                                              | Illumina HumanCore Exome and MetaboChip                                             | GenomeStudio            | call rate < 95%, pHWE < 1e-6, monomorphic removed                                                                                                                                                                                     | HCE: 306,474. MC: 155,499 | Eagle2    | Minimac3                   | Haplotype Reference Consortium 1.1                               | None                               | EPACTS          | PC1-PC5                                                                | r <sup>2</sup> |
| GCKD                        | Call rate < 97%, failed sex check, outside 2 SD of mean heterozygosity, cryptic relatedness and genetic ancestry outlier                                                                                                                                                      | Illumina Omni2.5 Exome BeadChip                                                     | Illumina GenomeStudio   | Exclude SNPs with call rate < 96%, or HWE p < 1E-5, or MAF < 1%                                                                                                                                                                       | 2,337,794                 | Eagle     | Minimac3                   | Haplotype Reference Consortium 1.1                               | none                               | EPACTS          | no associated PCs                                                      | r <sup>2</sup> |
| Geisinger Research (MyCode) | none                                                                                                                                                                                                                                                                          | Illumina Human Omni Express Exome                                                   | Illumina's GenomeStudio | Removed samples and markers having:<br>1. IMPUTE2 info score < 0.7<br>2. Marker call rate < 99%<br>3. Sample call rate < 90%<br>4. MAF < 0.01<br>5. HWE < 1e-07<br>6. Removed SNPs having insertions and deletions                    | 589,485                   | SHAPEIT2  | Impute2                    | 1000 Genomes Project Phase 1 Release Version 3 ALL (March 2012)  | Removed SNPs with info score < 0.7 | PLATO v0.1      | not required                                                           | Info Score     |
| HANDLS                      | Ethnic outliers, cryptic relateds, and sex mismatches, call rate < 95%                                                                                                                                                                                                        | Illumina 1M genotyping array                                                        | Illumina GenomeStudio   | MAF < 0.01, HWE pvalue < 1.0E-07, call rate < 95%                                                                                                                                                                                     | 907,763                   | MACH 1.0  | Michigan Imputation Server | 1000 Genomes Project Phase 3 Version 5                           | None                               | EPACTS (v3.2.6) | PCs                                                                    | r <sup>2</sup> |
| HYPERGENES                  | Ethnic outliers, sex mismatches, related, call rate < 95%; Extremes in heterozygosity                                                                                                                                                                                         | Illumina 1M Duo genotyping array                                                    | Illumina GenomeStudio   | MAF < 0.01; Call rate < 99%; HWE < 0.00000004                                                                                                                                                                                         | 909,532                   | ShapelIT  | Minimac1                   | 1000 Genomes Project Phase 1 Release Version 3 (March 2012)      | none                               | EPACTS (v3.2.6) | PCs                                                                    | r <sup>2</sup> |
| Jackson Heart Study (JHS)   | sex mismatches, sample duplications or swaps, sample call rate < 95%                                                                                                                                                                                                          | Affymetrix 6.0                                                                      | Birdseed                | call rate < 95%                                                                                                                                                                                                                       | 868,969                   | MACH 1.0  | Minimac1                   | 1000 Genomes Project Phase 1 Release Version 3 (March 2012), ALL | none                               | EPACTS (v3.2.6) | PC1-PC10 and kinship matrix for continuous traits                      | r <sup>2</sup> |
| JMCC                        | sample call rate < 98 %, sex mismatches, related samples (IBD 0.1875), samples not mapping to JPT (1000 genomes)                                                                                                                                                              | Illumina HumanOmni Express Exome                                                    | GenomeStudio            | Call rate < 98%, pHWE < 10e-6, MAF < 1 %, exclude SNPs do not match or not present in 1000 Genomes phase 3 reference panel, remove SNPs with allele frequency difference > 20% between scaffold and EAS in 1000GP3, remove duplicates | 570,162                   | ShapelIT2 | Minimac3                   | 1000 Genomes Project Phase 3                                     | none                               | EPACTS          | PC1-PC5                                                                | r <sup>2</sup> |
| KORA_F3                     | check for European ancestry, check for population outlier                                                                                                                                                                                                                     | Illumina Omni 2.5/Illumina Omni Express                                             | GenomeStudio            | call rate > 97%, mismatch of phenotypic and genetic gender, 5SD from mean heterozygosity rate, comparison with other genotyping of the same individuals (MetaboChip, Exome, Omni)                                                     | 587,981                   | ShapelIT  | Michigan Imputation Server | 1000 Genomes Project Phase 3 Version 5                           | none                               | EPACTS (v3.2.6) | PC1-PC10                                                               | r <sup>2</sup> |
| KORA_F4                     | check for European ancestry, check for population outlier                                                                                                                                                                                                                     | Affymetrix Axiom                                                                    | Affymetrix Software     | call rate > 97%, mismatch of phenotypic and genetic gender, 5SD from mean heterozygosity rate, comparison with other genotyping of the same individuals (MetaboChip, Exome, Omni)                                                     | 508,532                   | ShapelIT  | Michigan Imputation Server | 1000 Genomes Project Phase 3 Version 5                           | none                               | EPACTS (v3.2.6) | PC1-PC10                                                               | r <sup>2</sup> |
| Lifelines                   | call rate < 95%; sex mismatch; heterozygosity > 4SD from mean; non-Caucasians/IBS                                                                                                                                                                                             | Illumina Cyto SNP12 v2                                                              | GenomeStudio            | samples with call rate < 0.8, excess heterozygosity, non-Caucasian ethnicity (as determined by PCA), high relatedness (pi-hat > 0.4) or a gender mismatch; SNPs with MAF < 1%, a HWE p-value ≤ 10 <sup>-3</sup> , or a callrate < 95% | 257,581                   |           | Minimac1                   | 1000 Genomes Project Phase 1 Release Version 3 (March 2012)      | none                               | PLINK 1.90 beta | PC1-PC10                                                               | r <sup>2</sup> |
| MDC-CC                      | 1. bad call rate<br>2. excess homozygosity<br>3. failed gender check<br>4. Related individuals/duplicates<br>5. Population outliers                                                                                                                                           | Illumina HumanOmni Express Exome BeadChip v. 1.0                                    | GenomeStudio v2011.1    | monomorphic, bad call rate (< 95%), fail HWE (p < 10 <sup>-6</sup> )                                                                                                                                                                  | ~800,000                  | ShapelIT2 | Impute2                    | 1000 Genomes Project Phase 1 Release Version 3 ALL (March 2012)  | none                               | SNPTEST         | PC1-PC10                                                               | Info Score     |
| MESA-AFR                    | Sex discrepancy, duplicates, call rate < 95%, pHW < 1E-6, heterozygosity, and outliers                                                                                                                                                                                        | Affymetrix Genome-Wide Human SNP Array 6.0                                          | Birdseed v2             | call rate > 95%, MA > 1%                                                                                                                                                                                                              | 897,979                   | ShapelIT2 | Michigan Imputation Server | 1000 Genomes Project Phase 3 Version 5 ALL                       | none                               | EPACTS (v3.2.6) | PC1-PC3                                                                | r <sup>2</sup> |
| MESA-EUR                    | Sex discrepancy, duplicates, call rate < 95%, pHW < 1E-6, heterozygosity, and outliers                                                                                                                                                                                        | Affymetrix Genome-Wide Human SNP Array 6.0                                          | Birdseed v2             | call rate > 95%, MA > 1%                                                                                                                                                                                                              | 897,979                   | ShapelIT2 | Michigan Imputation Server | Haplotype Reference Consortium                                   | none                               | EPACTS (v3.2.6) | PC1-PC3                                                                | r <sup>2</sup> |
| MESA-HIS                    | Sex discrepancy, duplicates, call rate < 95%, pHW < 1E-6, heterozygosity, and outliers                                                                                                                                                                                        | Affymetrix Genome-Wide Human SNP Array 6.0                                          | Birdseed v2             | call rate > 95%, MA > 1%                                                                                                                                                                                                              | 897,979                   | ShapelIT2 | Michigan Imputation Server | 1000 Genomes Project Phase 3 Version 5 ALL                       | none                               | EPACTS (v3.2.6) | PC1-PC3                                                                | r <sup>2</sup> |
| MESA-EAS                    | Sex discrepancy, duplicates, call rate < 95%, pHW < 1E-6, heterozygosity, and outliers                                                                                                                                                                                        | Affymetrix Genome-Wide Human SNP Array 6.0                                          | Birdseed v2             | call rate > 95%, MA > 1%                                                                                                                                                                                                              | 897,979                   | ShapelIT2 | Michigan Imputation Server | 1000 Genomes Project Phase 3 Version 5 ALL                       | none                               | EPACTS (v3.2.6) | PC1-PC3                                                                | r <sup>2</sup> |
| METSIM                      | call rate, sex check, duplicate removal, PC outliers                                                                                                                                                                                                                          | Illumina HumanOmni Express-12v1                                                     | GenomeStudio            | call rate > 95%, MAF < 1%                                                                                                                                                                                                             |                           | ShapelIT2 | Minimac3                   | Haplotype Reference Consortium 1.1                               | none                               | EPACTS          | mixed-model                                                            | r <sup>2</sup> |
| NESDA                       | Non-Caucasians, XO and XXY samples, and samples with a call rate < 90%, high genome-wide homo- or heterozygosity, excess IBS                                                                                                                                                  | Perlegen-Affymetrix 5.0; Affymetrix 6.0 907K                                        | Birdseed                | call rates > 95%; MAF < 0.01; pHWE < 1E-5; ambiguous location or allele with reference; > 20% allele frequency difference from reference; ambiguous SNPs with a MAF > 35%                                                             | 378,163                   | MACH      | Minimac3                   | 1000 Genomes Project Phase 1 Release Version 3 ALL (March 2012)  | none                               | EPACTS          | PC1-PC3                                                                | r <sup>2</sup> |
| OGP                         | sex mismatches, sample duplications or swaps, sample call rate < 95%                                                                                                                                                                                                          | Affymetrix 500K Gene Chip                                                           | BRLMM                   | call rate < 95%; MAF < 1%; pHWE < 1 × 10 <sup>-6</sup>                                                                                                                                                                                | 347,517                   | BEAGLE    | Michigan Imputation Server | Haplotype Reference Consortium                                   | none                               | EPACTS (v3.2.6) | Genomic Kinship for quantitative traits; First 3 PCs for binary traits | r <sup>2</sup> |
| PIVUS                       | Call rate < 95%; sex mismatch; extreme heterozygosity; related individuals; ancestry outliers                                                                                                                                                                                 | Illumina Omni Express and MetaboChip                                                | GenomeStudio            | call rate < 95%, HWE p < 10 <sup>-6</sup> , MAF < 1%                                                                                                                                                                                  | 738,583                   | ShapelIT2 | Impute4                    | Haplotype Reference Consortium                                   | info < 0.4                         | SNPTEST         | PC1-PC2                                                                | Info Score     |

|                  |                                                                                                                                                                                                                                                                                                                                                                                      |                                                                                                                        |                                                                           |                                                                                                                                                                                                                                    |         |           |                            |                                                                                                                    |                               |                      |                                      |                |
|------------------|--------------------------------------------------------------------------------------------------------------------------------------------------------------------------------------------------------------------------------------------------------------------------------------------------------------------------------------------------------------------------------------|------------------------------------------------------------------------------------------------------------------------|---------------------------------------------------------------------------|------------------------------------------------------------------------------------------------------------------------------------------------------------------------------------------------------------------------------------|---------|-----------|----------------------------|--------------------------------------------------------------------------------------------------------------------|-------------------------------|----------------------|--------------------------------------|----------------|
| POPGEN           | sample call rate < 90 %, sex mismatches, duplicates Samples (BD 0.185), samples with heterozygosity outside mean +3SD, samples not mapping to CEU (Hapmap), i.e. outside median + 3*IQR and samples with batch problems, i.e. outside median + 3*IQR                                                                                                                                 | Affymetrix Axiom, Affymetrix 6.0, Illumina Immunochip (Beadchip), Illumina MetaboChip, Illumina 550k (merged after QC) | Illumina GenomeStudio or Illumina Optical                                 | SNP call rate < 5%, HWE < 1x10 <sup>-5</sup> , no MAF for QC but MAF pre Imputation                                                                                                                                                | 1049248 | ShapelT2  | Impute2                    | 1000 Genomes Project Phase 1 Release Version 3 ALL (March 2012)                                                    | removed SNPs with info <= 0.3 | EPACTS               | not required                         | Info Score     |
| PREVEND          | call rate <95%; sex mismatch; non-Caucasians; duplicated samples                                                                                                                                                                                                                                                                                                                     | Illumina Cyto SNP12 v2                                                                                                 | Illumina GenomeStudio                                                     | call rate < 95%; MAF <1%; pHWE < 1E-4                                                                                                                                                                                              | 232571  | ShapelT2  | Michigan Imputation Server | Haplotype Reference Consortium                                                                                     | none                          | SNPTEST V2           | PC1-PC5 and exclusion of PC outliers | Info Score     |
| RS-I             | MAF < 0.05, SNP callrate < 0.95 and/or HWE p-value < 1 x 10 <sup>-7</sup> , excess heterozygosity, gender swaps, genetic ancestry and familial relationships                                                                                                                                                                                                                         | Illumina 550K                                                                                                          | GeneCall                                                                  | MAF < 0.05, SNP callrate < 0.95 and/or HWE p value < 1 x 10 <sup>-7</sup>                                                                                                                                                          | 502668  | MaCH      | Minimac 3                  | Haplotype Reference Consortium 1.0                                                                                 | none                          | RVTEST               | PC1-PC5                              | r <sup>2</sup> |
| RS-II            | MAF < 0.05, SNP callrate < 0.95 and/or HWE p-value < 1 x 10 <sup>-7</sup> , excess heterozygosity, gender swaps, genetic ancestry and familial relationships                                                                                                                                                                                                                         | Illumina 550K                                                                                                          | GeneCall                                                                  | MAF < 0.05, SNP callrate < 0.95 and/or HWE p value < 1 x 10 <sup>-8</sup>                                                                                                                                                          | 490409  | MaCH      | Minimac 4                  | Haplotype Reference Consortium 1.0                                                                                 | none                          | RVTEST               | PC1-PC5                              | r <sup>2</sup> |
| RS-III           | MAF < 0.05, SNP callrate < 0.95 and/or HWE p-value < 1 x 10 <sup>-7</sup> , excess heterozygosity, gender swaps, genetic ancestry and familial relationships                                                                                                                                                                                                                         | Illumina 610K and 660K                                                                                                 | GeneCall                                                                  | MAF < 0.05, SNP callrate < 0.95 and/or HWE p value < 1 x 10 <sup>-9</sup>                                                                                                                                                          | 517658  | MaCH      | Minimac 5                  | Haplotype Reference Consortium 1.0                                                                                 | none                          | RVTEST               | PC1-PC5                              | r <sup>2</sup> |
| SHIP             | duplicate samples (by IBS), reported/genotyped gender mismatch, callrate <= 92%                                                                                                                                                                                                                                                                                                      | Affymetrix SNP 6.0                                                                                                     | Birdseed2                                                                 | pHWE <= 0.0001 or CallRate <= 0.95 or monomorphic SNPs, duplicate IDs, inconsistent reference alleles, mapping problem to build 37                                                                                                 | 823635  | Eagle2    | Minimac3                   | Haplotype Reference Consortium 1.1                                                                                 | none                          | EPACTS-3.2.6-patched | not required                         | r <sup>2</sup> |
| SIMES            | monomorphic, call rate <95%, pHW <1E-6, heterozygosity, related individuals/duplicates, discordant ethnicity, and gender discrepancy.                                                                                                                                                                                                                                                | Illumina Human610-Quad Beadchips                                                                                       | Genomestudio GenTrain and GenCall                                         | T2D DIAMANTE protocol: exclude SNPs do not match or not present in 1000 Genomes phase 3 reference panel, remove SNPs with allele frequency difference >20% between scaffold and reference population in 1000Gp3, remove duplicates | 549947  | ShapelIT  | Michigan Imputation Server | 1000 Genomes Project Phase 3 Version 5 ALL                                                                         | none                          | EPACTS (v3.2.6)      | PC1, PC2                             | r <sup>2</sup> |
| SINDI            | monomorphic, call rate <95%, pHW <1E-6, heterozygosity, related individuals/duplicates, discordant ethnicity, and gender discrepancy.                                                                                                                                                                                                                                                | Illumina Human610-Quad Beadchips                                                                                       | Genomestudio GenTrain and GenCall                                         | T2D DIAMANTE protocol: exclude SNPs do not match or not present in 1000 Genomes phase 3 reference panel, remove SNPs with allele frequency difference >20% between scaffold and reference population in 1000Gp3, remove duplicates | 552278  | ShapelIT  | Michigan Imputation Server | 1000 Genomes Project Phase 3 Version 5 ALL                                                                         | none                          | EPACTS (v3.2.6)      | PC1-PC3                              | r <sup>2</sup> |
| SOLID-TIMI 52    | individuals excluded if call rate <97%, >3rd degree relative determined by kinship coefficient estimates from KING, GWAS gene didn't match annotated gender                                                                                                                                                                                                                          | Axiom® Biobank Plus Genotyping Array                                                                                   |                                                                           | call rates <95%, monomorphic, Hardy-Weinberg <E-6,                                                                                                                                                                                 | ~547000 |           | HAPI-UR                    | 1000 Genomes Project Phase 1 Release Version 3 ALL (March 2012)                                                    | none                          | EPACTS (v3.2.6)      | PC1-PC10                             | Info Score     |
| STABILITY        | individuals excluded if call rate <95%, >3rd degree relative determined by kinship coefficient estimates from KING, GWAS gene didn't match annotated gender                                                                                                                                                                                                                          | Illumina HumanOmniExpressExome-8 v1 array                                                                              |                                                                           | call rates <95%, monomorphic, Hardy-Weinberg <E-7,                                                                                                                                                                                 | 881788  | ShapelIT2 | Minimac3                   | 1000 Genomes Project Phase 1 Release Version 3 ALL (March 2012)                                                    | none                          | EPACTS (v3.2.6)      | PC1-PC10                             | r <sup>2</sup> |
| ULSAM            | Call rate <95%; sex mismatch; extreme heterozygosity; related individuals; ancestry outliers                                                                                                                                                                                                                                                                                         | Illumina 2.5M and MetaboChip                                                                                           | Genome Studio                                                             | call rate <95%, HWE p<10 <sup>-6</sup> , MAF<1%                                                                                                                                                                                    | 1621481 | ShapelIT2 | Impute4                    | Haplotype Reference Consortium                                                                                     | info<0.4                      | SNPTEST              | PC1-PC2                              | Info Score     |
| Vanderbilt-660   | sex check, duplicate removal, call rate (<98%), HapMap concordance check                                                                                                                                                                                                                                                                                                             | Illumina 660W                                                                                                          | Genome Studio                                                             | call rate <98%, HWE<0.001, MAF <0.001                                                                                                                                                                                              | 527715  | ShapelIT  | Minimac3                   | Haplotype Reference Consortium 1.1                                                                                 | none                          | EPACTS               | PC1-PC3                              | r <sup>2</sup> |
| Vanderbilt-AA1M  | sex check, duplicate removal, call rate (<98%), HapMap concordance check                                                                                                                                                                                                                                                                                                             | Illumina 1M                                                                                                            | Genome Studio                                                             | call rate <98%, HWE<0.001, MAF <0.001                                                                                                                                                                                              | 784048  | ShapelIT  | Minimac3                   | Haplotype Reference Consortium 1.1                                                                                 | none                          | EPACTS               | PC1-PC3                              | r <sup>2</sup> |
| Vanderbilt-Omni1 | sex check, duplicate removal, call rate (<98%), HapMap concordance check                                                                                                                                                                                                                                                                                                             | Illumina OMNI-Quad                                                                                                     | Genome Studio                                                             | call rate <98%, HWE<0.001, MAF <0.001                                                                                                                                                                                              | 924162  | ShapelIT  | Minimac3                   | Haplotype Reference Consortium 1.1                                                                                 | none                          | EPACTS               | PC1-PC3                              | r <sup>2</sup> |
| Vanderbilt-Omni5 | sex check, duplicate removal, call rate (<98%), HapMap concordance check                                                                                                                                                                                                                                                                                                             | HumanOmni5-Quad                                                                                                        | Genome Studio                                                             | call rate <98%, HWE<0.001, MAF <0.001                                                                                                                                                                                              | 3702007 | ShapelIT  | Minimac3                   | Haplotype Reference Consortium 1.1                                                                                 | none                          | EPACTS               | PC1-PC3                              | r <sup>2</sup> |
| YFS              | call rates < 95%, pHWE < 1E-6, sex mismatch, MDS outliers, excess heterozygosity                                                                                                                                                                                                                                                                                                     | Illumina 670k Custom                                                                                                   | Illuminus                                                                 | call rate<95%, pHWE<1e-6, monomorphic removed                                                                                                                                                                                      | 542086  | Eagle2    | Minimac3                   | Haplotype Reference Consortium 1.1                                                                                 | None                          | EPACTS               | PC1-PC5                              | r <sup>2</sup> |
| AugUR            | sex check, duplicate removal, relatedness, call rate (<98%), HapMap concordance check                                                                                                                                                                                                                                                                                                | Infinium® Global Screening Array-24 v1.0                                                                               | GenomeStudio                                                              | call rate<95%, pHWE<1e-6, monomorphic removed, removed variants not in reference                                                                                                                                                   | 614130  | ShapelIT  | Minimac3                   | 1000 Genomes Project Phase 3 Version 5 ALL                                                                         | None                          | rvtests              | PC1-PC4                              | r <sup>2</sup> |
| HUNT             | Only Europeans were included for this analysis. Samples with call rate <99%, departures from HWE, duplicates, gender mismatch, unusual XY composition, mismatch with reference genome, and samples with contamination > 2.5% were removed                                                                                                                                            | Illumina Hunt                                                                                                          | GenCall from                                                              | call rate <95%, MAF<0.5%, pHWE<10e-5                                                                                                                                                                                               | 368139  | Eagle2    | Minimac3                   | Haplotype Reference Consortium release 1.1 + 2.201 low coverage whole-genome sequences samples from the HUNT study | r <sup>2</sup> >0.3           | SAIGE v0.3           | PC1-PC4                              | r <sup>2</sup> |
| MGI              | Only European individuals were used for analysis, duplicates, gender mismatch, unusual XY composition, related samples, and samples with contamination > 2.5% were removed                                                                                                                                                                                                           | the Illumina Infinium CoreExome-24                                                                                     | GenomeStudio                                                              | Sample call rate < 99%, chromosomal call-rate drop > 5%                                                                                                                                                                            | 502255  | Eagle     | Minimac3                   | HRC                                                                                                                | none                          | rvtests              | PC1-PC4                              | r <sup>2</sup> |
| UKBB             | variants showing batch effects, plate effects, departures from HWE, sex effects, array effects, discordance across control replicates. Samples: ancestry outliers, outliers for heterozygosity and missingness. Further QC details can be found here : <a href="https://www.biorxiv.org/content/early/2017/07/20/166298">https://www.biorxiv.org/content/early/2017/07/20/166298</a> | UK BiLEVE Axiom array, UK Biobank Axiom array                                                                          | Axiom GT1 algorithm as implemented in the Affymetrix Power Tools software | Failed QC in > 1 batch, call rate < 95%, MAF < 0.0001, further details can be found here : <a href="https://www.biorxiv.org/content/early/2017/07/20/166298">https://www.biorxiv.org/content/early/2017/07/20/166298</a>           | 670739  | ShapelIT3 | Impute4                    | Haplotype Reference Consortium                                                                                     | None                          | Quicktest            | PC1-PC10                             | Info Score     |

<sup>1</sup> References for cited software: MACH (PMID: 19715440); ShapelIT (PMID: 22138821); Eagle (PMID: 27270109); Beagle (PMID: 21310274).

<sup>2</sup> References for cited software: ImputeV2 (PMID: 19543373); minimac3 (PMID: 27571263); PBWT (PMID: 24413527); Sanger Imputation server (PMID: 27548312); Michigan Imputation Server (PMID: 27571263).

<sup>3</sup> References for cited software: EPACTS (Kang, H.M. Epacts: Efficient and Parallelizable Association Container Toolbox. University of Michigan; Department of Biostatistics and Center for Statistical Genetics (2012); PMID: 20208533); SNPTEST (PMID: 20517342); RegScan (PMID: 24008273); RVTESTS (PMID: 27153000); PLINK 1.90 (PMID: 25722852); GenABEL (PMID: 17384015); ProbABEL (PMID: 20233392); GWAFF (PMID: 20040588); GEMMA (PMID: 22706312); mach2qt (PMID: 21058334).

| Supplementary Table S3: Description of participating studies: phenotype distribution |          |                             |                                 |        |                        |                        |                           |                                      |           |                |                 |
|--------------------------------------------------------------------------------------|----------|-----------------------------|---------------------------------|--------|------------------------|------------------------|---------------------------|--------------------------------------|-----------|----------------|-----------------|
| Study                                                                                | Subgroup | Ancestry (EA/AA/HIS/EAS/SA) | Time to followup median [years] | Male % | Diabetes at baseline % | Age at baseline median | Age at baseline mean (SD) | eGFRcrea at baseline median (Q1, Q3) | n decline |                |                 |
|                                                                                      |          |                             |                                 |        |                        |                        |                           |                                      | overall   | DM at baseline | CKD at baseline |
| ADVANCE                                                                              | 5        | EA                          | 4.35                            | 70%    | 100%                   | 67.2                   | 67.4 (6.6)                | 72.1 (59.5, 86.3)                    | 752       | 752            | 192             |
|                                                                                      | 6        | EA                          | 4.35                            | 62%    | 100%                   | 67.2                   | 67.4 (6.6)                | 74.0 (62.8, 86.1)                    | 2,169     | 2,169          | 436             |
|                                                                                      | UKB      | EA                          | 4.35                            | 59%    | 100%                   | 68.4                   | 67.4 (6.6)                | 69.3 (57.4, 83.2)                    | 1,061     | 1,061          | 319             |
| AFTER EU                                                                             |          | EA                          | 6.00                            | 57%    | 100%                   | 42.7                   | 43.7 (11.1)               | 89.7 (67.0, 103.9)                   | 831       | 831            | 140             |
| Amish                                                                                |          | EA                          | 7.00                            | 50%    | 1%                     | 48.0                   | 48.3 (16.3)               | 100.4 (88.9, 111.6)                  | 798       | NA             | NA              |
| ARIC                                                                                 | AA       | AA                          | 8.38                            | 37%    | 20%                    | 53.3                   | 53.9 (5.8)                | 115.0 (102.8, 123.9)                 | 1,903     | 298            | NA              |
|                                                                                      | EA       | EA                          | 8.69                            | 47%    | 9%                     | 54.6                   | 54.8 (5.7)                | 101.1 (94.2, 107.4)                  | 7,284     | 545            | NA              |
| ASPS                                                                                 |          | EA                          | 1.00                            | 43%    | 0%                     | 65.0                   | 65.8 (8)                  | 73.6 (63.7, 88.1)                    | 469       | NA             | NA              |
| ASPS-Fam                                                                             |          | EA                          | 4.00                            | 40%    | 0%                     | 68.0                   | 64.6 (10.6)               | 76.6 (65.3, 86.8)                    | 104       | NA             | NA              |
| BioMe                                                                                | Omni EA  | EA                          | 2.77                            | 35%    | 5%                     | 62.9                   | 63.8 (8.7)                | 76.3 (63.8, 89.1)                    | 852       | 110            | 134             |
|                                                                                      | Omni AA  | AA                          | 5.34                            | 52%    | 3%                     | 47.0                   | 47.1 (13.7)               | 96.6 (79.9, 114.8)                   | 1,717     | NA             | 153             |
|                                                                                      | Omni HA  | HIS                         | 4.97                            | 37%    | 6%                     | 48.4                   | 48.7 (14.8)               | 92.5 (77.0, 106.1)                   | 2,123     | 123            | 180             |
| CHS                                                                                  | AA       | AA                          | 4.00                            | 39%    | 24%                    | 72.0                   | 72.9 (5.7)                | 72.0 (59.5, 87.2)                    | 481       | NA             | 100             |
|                                                                                      | EA       | EA                          | 6.00                            | 44%    | 12%                    | 71.0                   | 72.3 (5.4)                | 65.2 (55.3, 75.9)                    | 2,080     | 210            | 673             |
| Cilento                                                                              |          | EA                          | 8.00                            | 44%    | 10%                    | 53.0                   | 52.6 (19.7)               | 92.2 (80.2, 107.1)                   | 788       | NA             | NA              |
| DECODE                                                                               |          | EA                          | 14.00                           | 47%    | 5%                     | 44.0                   | 45.4 (18.9)               | 94.1 (78.56, 108.9)                  | 117,666   | 9,471          | 10,086          |
| DIACORE                                                                              |          | EA                          | 2.96                            | 60%    | 100%                   | 66.7                   | 65.5 (8.8)                | 82.4 (67.8, 92.9)                    | 2,169     | 2,169          | 352             |
| ESTHER                                                                               |          | EA                          | 5.00                            | 42%    | 17%                    | 62.0                   | 61.6 (6.5)                | 93.0 (76.5, 103.0)                   | 1,090     | 155            | NA              |
| FHS                                                                                  |          | EA                          | 15.00                           | 47%    | 6%                     | 54.0                   | 54.0 (14.9)               | 74.4 (47.1, 102.1)                   | 2,925     | 195            | 1,296           |
| FINCAVAS                                                                             |          | EA                          | 8.90                            | 61%    | 13%                    | 57.8                   | 55.1 (13.2)               | 90.8 (78.4, 100.0)                   | 835       | 123            | NA              |
| GCKD                                                                                 |          | EA                          | 2.00                            | 60%    | 35%                    | 63.0                   | 60.1 (12)                 | 46.4 (37.1, 57.4)                    | 3,941     | 1,341          | 3,115           |
| Geisinger Research (MyCode)                                                          |          | EA                          | 13.00                           | 42%    | 13%                    | 50.0                   | 49 (15.2)                 | 95.1 (80.1, 107.6)                   | 36,286    | 4,659          | 2,237           |
| HANDLS                                                                               |          | AA                          | 5.00                            | 44%    | 18%                    | 49.0                   | 48.5 (9)                  | 102.6 (87.6, 116.4)                  | 735       | 135            | NA              |
| HYPERGENES                                                                           | controls | EA                          | 1.50                            | 61%    | 0%                     | 57.5                   | 59.5 (9.8)                | 87.7 (76.9, 97.5)                    | 461       | NA             | NA              |
| Jackson Heart Study (JHS)                                                            |          | AA                          | 6.60                            | 38%    | 22%                    | 55.5                   | 55.1 (12.8)               | 96.5 (80.6, 110.0)                   | 2,162     | 418            | NA              |
| JMICC                                                                                |          | EAS                         | 5.03                            | 40%    | 3%                     | 54.3                   | 54.0 (9.4)                | 102.2 (96.0, 108.4)                  | 975       | NA             | NA              |
| KORA                                                                                 | F3       | EA                          | 10.00                           | 47%    | 2%                     | 47.0                   | 47.3 (13.0)               | 104.4 (94.0, 113.8)                  | 2,878     | NA             | NA              |
|                                                                                      | F4       | EA                          | 7.00                            | 49%    | 3%                     | 49.0                   | 49.2 (13.9)               | 93.9 (81.9, 105.2)                   | 2,916     | NA             | NA              |
| Lifelines                                                                            |          | EA                          | 5.50                            | 42%    | 3%                     | 47.0                   | 48.1 (11.4)               | 94.2 (83.1, 104.1)                   | 10,553    | 322            | 142             |
| MDC-CC                                                                               |          | EA                          | 16.49                           | 41%    | 4%                     | 56.3                   | 56.4 (5.7)                | 80.7 (70.9, 90.6)                    | 2,889     |                |                 |
| MESA                                                                                 | AFR      | AA                          | 4.00                            | 46%    | 17%                    | 63.0                   | 62.3 (10.1)               | 82.3 (70.1, 95.1)                    | 1,283     | 198            | 122             |
|                                                                                      | EAS      | EAS                         | 4.00                            | 49%    | 13%                    | 62.0                   | 62.7 (10.2)               | 83.2 (71.3, 93.7)                    | 615       | NA             | NA              |
|                                                                                      | EUR      | EA                          | 4.00                            | 48%    | 5%                     | 63.0                   | 62.4 (10.4)               | 75.4 (65.6, 86.2)                    | 2,199     | 128            | 297             |
|                                                                                      | HIS      | HIS                         | 4.00                            | 48%    | 17%                    | 61.0                   | 61.4 (10.3)               | 84.2 (71.1, 94.3)                    | 1,176     | 187            | NA              |
| METSIM                                                                               |          | EA                          | 4.00                            | 100%   | 13%                    | 57.0                   | 57.7 (7.1)                | 93.5 (85.3, 100.0)                   | 5,349     | 596            | NA              |
| NESDA                                                                                |          | EA                          | 6.00                            | 34%    | 4%                     | 43.0                   | 41.9 (13.1)               | 103.7 (93.9, 114.8)                  | 1,758     | NA             | NA              |
| OGP                                                                                  |          | EA                          | 6.34                            | 33%    | 7%                     | 51.7                   | 53.2 (17.7)               | 73.1 (61.5, 85.0)                    | 407       | NA             | NA              |
| PIVUS                                                                                |          | EA                          | 5.13                            | 50%    | 11%                    | 70.1                   | 70.2 (0.2)                | 81.7 (67.4, 90.6)                    | 539       | NA             | NA              |
| POPGEN                                                                               |          | EA                          | 6.00                            | 53%    | 3%                     | 57.0                   | 54.7 (14.2)               | 91.0 (80.0, 100.9)                   | 821       | NA             | NA              |
| PREVEND                                                                              |          | EA                          | 4.00                            | 52%    | 4%                     | 49.0                   | 49.6 (12.5)               | 84.3 (73.7, 94.4)                    | 2,932     | 105            | 149             |
| RS                                                                                   | I        | EA                          | 7.22                            | 40%    | 13%                    | 72.3                   | 73.2 (7.6)                | 74.5 (64.3, 84.2)                    | 1,338     | 121            | 116             |
|                                                                                      | II       | EA                          | 9.30                            | 46%    | 12%                    | 62.0                   | 64.8 (8.0)                | 81.7 (71.5, 91.1)                    | 1,248     | NA             | NA              |
|                                                                                      | III      | EA                          | 5.34                            | 44%    | 9%                     | 56.9                   | 57.2 (6.9)                | 86.5 (76.9, 95.5)                    | 2,289     | NA             | NA              |
| SHIP                                                                                 | 1        | EA                          | 3.00                            | 48%    | 9%                     | 55.0                   | 54.5 (15.3)               | 90.4 (75.9, 103.8)                   | 2,163     | 133            | NA              |
| SiMES                                                                                |          | EAS                         | 3.67                            | 49%    | 31%                    | 58.8                   | 59.6 (11.0)               | 79.3 (64.7, 92.4)                    | 1,451     | 405            | 191             |
| SINDI                                                                                |          | EAS                         | 4.68                            | 51%    | 40%                    | 56.8                   | 58 (10.0)                 | 93.9 (80.5, 103.0)                   | 1,554     | 552            | NA              |
| SOLID-TIMI 52                                                                        | EA       | EA                          | 2.00                            | 75%    | 26%                    | 64.0                   | 64.5 (9.3)                | 78.9 (65.1, 91.0)                    | 5,759     | 1,473          | 938             |
|                                                                                      | EAS      | EAS                         | 3.00                            | 83%    | 34%                    | 65.0                   | 64.7 (9.0)                | 84.3 (70.1, 92.1)                    | 235       | NA             | NA              |
|                                                                                      | SA       | SA                          | 1.00                            | 79%    | 34%                    | 62.0                   | 61.0 (11.1)               | 76.9 (62.4, 92.9)                    | 207       | NA             | NA              |
| STABILITY                                                                            | EA       | EA                          | 3.00                            | 82%    | 37%                    | 65.0                   | 64.7 (9.1)                | 73.4 (61.2, 85.6)                    | 7,687     | 2,821          | 1,677           |
|                                                                                      | EAS      | EAS                         | 3.00                            | 78%    | 43%                    | 65.0                   | 64 (9.1)                  | 83.1 (68.1, 92.8)                    | 523       | 222            | NA              |
|                                                                                      | SA       | SA                          | 3.00                            | 84%    | 41%                    | 59.0                   | 58.5 (10.4)               | 78.5 (64.7, 90.6)                    | 469       | NA             | NA              |
| ULSAM                                                                                |          | EA                          | 6.75                            | 100%   | 10%                    | 71.0                   | 71.0 (0.6)                | 57.7 (51.7, 63.9)                    | 686       | NA             | 424             |
| Vanderbilt                                                                           | 660      | EA                          | 8.81                            | 45%    | 4%                     | 54.8                   | 54.0 (15.8)               | 86.5 (71.1, 100.4)                   | 1,429     | NA             | 146             |
|                                                                                      | AA1M     | AA                          | 9.76                            | 34%    | 6%                     | 47.5                   | 47.6 (16.2)               | 100.3 (79.6, 119.3)                  | 755       | NA             | NA              |
|                                                                                      | Omni1    | EA                          | 8.97                            | 53%    | 3%                     | 55.4                   | 54.0 (15.8)               | 88.2 (70.1, 102.8)                   | 1,859     | NA             | 244             |
|                                                                                      | Omni5    | EA                          | 4.32                            | 55%    | 8%                     | 55.9                   | 52.9 (17.2)               | 88.2 (69.4, 103.6)                   | 508       | NA             | NA              |
| YFS                                                                                  |          | EA                          | 6.00                            | 46%    | 0%                     | 33.0                   | 31.6 (5.0)                | 109.7 (100.2, 116.4)                 | 1,683     | NA             | NA              |
| AugUR                                                                                |          | EA                          | 2.40                            | 55%    | 22%                    | 76.7                   | 77.6 (5.0)                | 68.9 (59.0, 80.3)                    | 677       | 147            | 184             |
| HUNT                                                                                 |          | EA                          | 21.20                           | 45%    | 5%                     | 44.5                   | 45.1 (13.7)               | 104.0 (92.7, 114.2)                  | 46,328    | 2,235          | 502             |
| MGI                                                                                  |          | EA                          | 6.00                            | 46%    | 39%                    | 52.0                   | 50.4 (15.5)               | 92.8 (77.7, 105.6)                   | 20,077    | 3,254          | 1,867           |
| UKBB                                                                                 |          | EA                          | 4.00                            | 50%    | 4%                     | 58.0                   | 57.1 (7.3)                | 92.6 (83.1, 99.0)                    | 15,442    | 542            | 241             |

AA: African American ancestry; EA: European ancestry; HIS: Hispanics; SA: South Asian ancestry; EAS: East Asian ancestry

CKD=Chronic Kidney Disease: eGFRcrea at baseline < 60 mL/min/1.73m<sup>2</sup>



**Supplementary Table S4: The 12 identified variants for eGFR-decline were associated with other kidney phenotypes, but not with DM-status.** For the 12 identified variants, we show association results for eGFR based in cystatin C<sup>S19</sup> (“eGFRcys”, n up to 460,826), blood urea nitrogen<sup>S12</sup> (“BUN”, n up to 416,178), urine albumin-to-creatinine ratio<sup>S20</sup> (“UACR”, n up to 564,257), chronic kidney disease<sup>S12</sup> (“CKD”, n up to 625,219) and DM<sup>S21</sup> (n up to 898,130) from published GWAS. Coded allele is the faster-decline allele (which is always the eGFR-lowering allele). Genome-wide significant P-values ( $P < 5.00 \times 10^{-8}$ ) are stated in bold.

| SNPID                                                 | Locus Name        | EA/OA | eGFRcys                 |                              | BUN                    |                              | UACR    |                              | CKD   |                              | DM    |       |
|-------------------------------------------------------|-------------------|-------|-------------------------|------------------------------|------------------------|------------------------------|---------|------------------------------|-------|------------------------------|-------|-------|
|                                                       |                   |       | Beta                    | P                            | Beta                   | P                            | Beta    | P                            | OR    | P                            | OR    | P     |
| Variants with genuine association for eGFR-decline    |                   |       |                         |                              |                        |                              |         |                              |       |                              |       |       |
| rs34882080                                            | <i>UMOD-PDILT</i> | a/g   | -0.011                  | <b>3.44x10<sup>-75</sup></b> | 0.010                  | <b>4.56x10<sup>-20</sup></b> | -0.011  | 1.14x10 <sup>-05</sup>       | 1.205 | <b>3.89x10<sup>-56</sup></b> | 0.992 | 0.570 |
| rs77924615                                            | <i>UMOD-PDILT</i> | g/a   | -0.012                  | <b>6.29x10<sup>-94</sup></b> | 0.012                  | <b>3.71x10<sup>-42</sup></b> | -0.010  | 7.24x10 <sup>-05</sup>       | 1.232 | <b>6.66x10<sup>-86</sup></b> | 0.989 | 0.400 |
| rs10254101                                            | <i>PRKAG2</i>     | t/c   | -0.0090                 | <b>1.64x10<sup>-70</sup></b> | 0.013                  | <b>4.52x10<sup>-43</sup></b> | -0.0029 | 0.191                        | 1.107 | <b>1.21x10<sup>-25</sup></b> | 0.986 | 0.220 |
| rs1028455                                             | <i>SPATA7</i>     | t/a   | -0.0016                 | 9.51x10 <sup>-04</sup>       | 0.0012                 | 0.105                        | 0.0026  | 0.213                        | 1.028 | 7.65x10 <sup>-04</sup>       | 0.984 | 0.160 |
| rs1458038                                             | <i>FGF5</i>       | c/t   | -0.0029                 | <b>9.45x10<sup>-09</sup></b> | 0.0043                 | <b>5.99x10<sup>-09</sup></b> | -0.0029 | 0.182                        | 1.065 | <b>7.36x10<sup>-14</sup></b> | 0.978 | 0.047 |
| rs4930319                                             | <i>OVOL1</i>      | c/g   | -0.0055                 | <b>1.26x10<sup>-29</sup></b> | -0.0050                | <b>3.74x10<sup>-11</sup></b> | -0.0038 | 0.066                        | 1.060 | <b>7.35x10<sup>-12</sup></b> | 1.005 | 0.640 |
| rs434215                                              | <i>TPPP</i>       | a/g   | -0.0044                 | <b>3.10x10<sup>-14</sup></b> | 0.0034                 | 0.008                        | 0.0034  | 0.201                        | 1.043 | 1.28x10 <sup>-03</sup>       | 0.989 | 0.380 |
| rs28857283                                            | <i>C15ORF54</i>   | g/a   | -0.0022                 | 5.76x10 <sup>-06</sup>       | 0.0026                 | 5.20x10 <sup>-04</sup>       | -0.0025 | 0.210                        | 1.050 | <b>1.19x10<sup>-08</sup></b> | 0.986 | 0.200 |
| rs13095391                                            | <i>ACVR2B</i>     | a/c   | 0.00020                 | 0.662                        | 0.0006                 | 0.479                        | -0.0017 | 0.743                        | 1.022 | 0.011                        | 0.983 | 0.180 |
| Variants without genuine association for eGFR-decline |                   |       |                         |                              |                        |                              |         |                              |       |                              |       |       |
| rs9998485                                             | <i>SHROOM3</i>    | a/g   | -0.0090                 | <b>3.94x10<sup>-83</sup></b> | 0.0031                 | 7.68x10 <sup>-04</sup>       | -0.012  | 0.023                        | 1.052 | <b>4.48x10<sup>-08</sup></b> | 1.000 | 0.980 |
| rs1047891                                             | <i>CPS1</i>       | a/c   | 0.0039                  | <b>3.40x10<sup>-15</sup></b> | -0.0068                | <b>1.26x10<sup>-15</sup></b> | -0.019  | <b>4.01x10<sup>-18</sup></b> | 1.053 | <b>2.99x10<sup>-08</sup></b> | 0.983 | 0.130 |
| rs2453533                                             | <i>GATM</i>       | a/c   | -1.00x10 <sup>-04</sup> | 0.844                        | 1.00x10 <sup>-04</sup> | 0.855                        | -0.013  | <b>4.49x10<sup>-10</sup></b> | 1.076 | <b>8.57x10<sup>-17</sup></b> | 0.972 | 0.010 |

**SNPID**=Variant identifier on GRCh37, **Locus name**=Nearest Gene, **EA/OA**=Effect allele / other allele, **Beta** and **P**=genetic effect coefficient of association and association P-value, **OR**=odds ratio, **P**=association P-value.

**Supplementary Table S5: The 12 identified variants for eGFR-decline do not show heterogeneity between ancestries and FHS is not an influential study.** We conducted MR-regression to test for heterogeneity between ancestries<sup>S13</sup> and the meta-analyses restricted to European or African American individuals (n=325,840 and 9,038, respectively; sample sizes for other ancestries were small). We also conducted a sensitivity meta-analysis excluding the FHS study (due to an initial uncertainty in the median eGFR-decline, n=2,925) and explored direction-consistency of genetic effects in FHS alone. Shown are the P-values for between-ancestry heterogeneity (P-anc-het) and beta-estimates in mL/min/1.73m<sup>2</sup> as well as P-values for the sensitivity analyses; significant P-values ( $P_{\text{decline}} \leq 0.05/12 = 4.17 \times 10^{-3}$ ) are stated in bold. Among the 12 variants, there was no evidence for between-ancestry heterogeneity ( $P\text{-anc-het} \geq 0.05$ ). Association estimates excluding FHS were similar to the original analysis estimates (**Table 1**) and FHS-specific estimates were mostly directionally consistent.

| SNPID                                                         | Locus Name              | EA/OA | P-anc-het | European |                              | African American |        | All no FHS |                              | FHS    |        |
|---------------------------------------------------------------|-------------------------|-------|-----------|----------|------------------------------|------------------|--------|------------|------------------------------|--------|--------|
|                                                               |                         |       |           | Beta     | P                            | Beta             | P      | Beta       | P                            | Beta   | P      |
| Variants identified with genuine association for eGFR-decline |                         |       |           |          |                              |                  |        |            |                              |        |        |
| rs34882080                                                    | <i>UMOD-PDILT</i>       | a/g   | 0.06      | 0.066    | <b>2.36x10<sup>-31</sup></b> | -0.083           | 0.174  | 0.065      | <b>9.70x10<sup>-30</sup></b> | 0.091  | 0.112  |
| rs77924615                                                    | <i>UMOD-PDILT</i>       | g/a   | 0.85      | 0.074    | <b>5.50x10<sup>-37</sup></b> | 0.016            | 0.836  | 0.073      | <b>3.77x10<sup>-37</sup></b> | 0.16   | 0.0423 |
| rs10254101                                                    | <i>PRKAG2</i>           | t/c   | 0.16      | 0.020    | <b>7.03x10<sup>-05</sup></b> | 0.066            | 0.223  | 0.020      | <b>4.35x10<sup>-05</sup></b> | 0.019  | 0.710  |
| rs1028455                                                     | <i>SPATA7</i>           | t/a   | 0.90      | 0.020    | <b>1.63x10<sup>-05</sup></b> | 0.023            | 0.517  | 0.020      | <b>1.12x10<sup>-05</sup></b> | 0.076  | 0.124  |
| rs1458038                                                     | <i>FGF5</i>             | c/t   | 0.23      | 0.019    | <b>3.79x10<sup>-05</sup></b> | -0.074           | 0.257  | 0.020      | <b>3.03x10<sup>-05</sup></b> | -0.030 | 0.565  |
| rs4930319                                                     | <i>OVOL1</i>            | c/g   | 0.70      | 0.014    | <b>2.19x10<sup>-03</sup></b> | 0.043            | 0.426  | 0.015      | <b>1.37x10<sup>-03</sup></b> | 0.045  | 0.347  |
| rs434215                                                      | <i>TPPP<sup>§</sup></i> | a/g   | 0.33      | 0.021    | <b>3.80x10<sup>-04</sup></b> | -0.044           | 0.532  | 0.021      | <b>5.43x10<sup>-04</sup></b> | 0.12   | 0.119  |
| rs28857283                                                    | <i>C15ORF54</i>         | g/a   | 0.22      | 0.021    | <b>3.44x10<sup>-06</sup></b> | 0.075            | 0.0730 | 0.022      | <b>1.32x10<sup>-06</sup></b> | 0.015  | 0.745  |
| rs13095391                                                    | <i>ACVR2B</i>           | a/c   | 0.29      | 0.018    | <b>1.67x10<sup>-04</sup></b> | 0.062            | 0.207  | 0.017      | <b>1.77x10<sup>-04</sup></b> | NA     | NA     |
| Variants without genuine association for eGFR-decline         |                         |       |           |          |                              |                  |        |            |                              |        |        |
| rs9998485                                                     | <i>SHROOM3</i>          | a/g   | 0.65      | 0.0048   | 0.242                        | 0.049            | 0.222  | 0.0070     | 0.156                        | NA     | NA     |
| rs1047891                                                     | <i>CPS1</i>             | a/c   | 0.35      | 0.0053   | 0.287                        | -0.0040          | 0.930  | 0.0040     | 0.482                        | 0.037  | 0.456  |
| rs2453533                                                     | <i>GATM</i>             | a/c   | 0.69      | 0.0045   | 0.638                        | 0.022            | 0.651  | 0.0010     | 0.785                        | 0.043  | 0.360  |

**SNPID**=Variant identifier on GRCh37, **Locus name**=Nearest Gene, **EA/OA**=Effect allele / other allele, **P-anc-het**=P-value of the test for between ancestry heterogeneity, **beta** and **P**=genetic effect coefficient of association and association P-value. <sup>§</sup> Since the *TPPP* locus lead variant had imputation quality <0.6 in 45% of the studies (median 0.64), we analyzed this locus omitting the imputation quality filter in all studies.

**Supplementary Table S6: No influence by DM-adjustment versus no DM-adjustment or by model-based versus formula-based adjustment for baseline eGFR (eGFR-BL) on the 12 variants' association with eGFR-decline.** We conducted a validation meta-analysis for the 12 identified variants for eGFR-decline (total n=103,970) to compare models with different covariate adjustment. Shown are beta-estimates and P-values for eGFR-decline DM-adjusted versus DM-unadjusted, and adjusted for eGFR-baseline by model as well as by formula (**Supplementary Note S1**); all models are age- and sex-adjusted. We found no impact by DM-adjustment, but by adjustment for eGFR-BL (when compared to “not adjusted for DM”, which is unadjusted for eGFR-BL). For adjustment for eGFR-BL, we found the same association statistics when model-computed versus formula-derived.

| SNPID                                                         | EA/OA | EAF  | Adjusted for DM |                        | Not adjusted for DM |                        | Adjusted for eGFR-BL by model |                        | Adjusted for eGFR-BL by formula |                        |
|---------------------------------------------------------------|-------|------|-----------------|------------------------|---------------------|------------------------|-------------------------------|------------------------|---------------------------------|------------------------|
|                                                               |       |      | beta            | P                      | beta                | P                      | beta                          | P                      | beta                            | P                      |
| Variants identified with genuine association for eGFR-decline |       |      |                 |                        |                     |                        |                               |                        |                                 |                        |
| rs34882080                                                    | a/g   | 0.83 | 0.058           | 4.86x10 <sup>-15</sup> | 0.058               | 4.60x10 <sup>-15</sup> | 0.077                         | 2.40x10 <sup>-27</sup> | 0.078                           | 1.06x10 <sup>-28</sup> |
| rs77924615                                                    | g/a   | 0.19 | 0.066           | 1.68x10 <sup>-19</sup> | 0.066               | 1.34x10 <sup>-19</sup> | 0.088                         | 7.83x10 <sup>-37</sup> | 0.087                           | 4.73x10 <sup>-37</sup> |
| rs10254101                                                    | t/c   | 0.28 | 0.016           | 0.0130                 | 0.016               | 0.0125                 | 0.032                         | 1.17x10 <sup>-07</sup> | 0.031                           | 1.15x10 <sup>-07</sup> |
| rs1028455                                                     | t/a   | 0.34 | 0.020           | 8.23x10 <sup>-04</sup> | 0.020               | 7.76x10 <sup>-04</sup> | 0.021                         | 1.87x10 <sup>-04</sup> | 0.021                           | 1.99x10 <sup>-04</sup> |
| rs1458038                                                     | c/t   | 0.35 | 0.019           | 1.67x10 <sup>-03</sup> | 0.019               | 1.68x10 <sup>-03</sup> | 0.025                         | 1.04x10 <sup>-05</sup> | 0.024                           | 1.31x10 <sup>-05</sup> |
| rs4930319                                                     | c/g   | 0.34 | 0.013           | 0.0241                 | 0.013               | 0.0279                 | 0.025                         | 1.09x10 <sup>-05</sup> | 0.025                           | 5.81x10 <sup>-06</sup> |
| rs434215                                                      | a/g   | 0.33 | 0.015           | 0.0395                 | 0.015               | 0.0414                 | 0.027                         | 9.20x10 <sup>-05</sup> | 0.027                           | 8.72x10 <sup>-05</sup> |
| rs28857283                                                    | g/a   | 0.37 | 0.019           | 1.08x10 <sup>-03</sup> | 0.019               | 1.08x10 <sup>-03</sup> | 0.026                         | 2.29x10 <sup>-06</sup> | 0.026                           | 2.73x10 <sup>-06</sup> |
| rs13095391                                                    | a/c   | 0.59 | 0.022           | 1.56x10 <sup>-04</sup> | 0.022               | 1.26x10 <sup>-04</sup> | 0.027                         | 5.70x10 <sup>-07</sup> | 0.027                           | 6.41x10 <sup>-07</sup> |
| Variants without genuine association for eGFR-decline         |       |      |                 |                        |                     |                        |                               |                        |                                 |                        |
| rs9998485                                                     | a/g   | 0.53 | 0.016           | 6.67x10 <sup>-03</sup> | 0.015               | 7.05x10 <sup>-03</sup> | 0.030                         | 4.55x10 <sup>-08</sup> | 0.030                           | 1.78x10 <sup>-08</sup> |
| rs1047891                                                     | a/c   | 0.31 | 0.010           | 0.1232                 | 0.010               | 0.126                  | 0.031                         | 1.66x10 <sup>-07</sup> | 0.030                           | 2.53x10 <sup>-07</sup> |
| rs2453533                                                     | a/c   | 0.40 | -0.0027         | 0.6378                 | -0.0028             | 0.631                  | 0.025                         | 4.46x10 <sup>-06</sup> | 0.025                           | 2.78x10 <sup>-06</sup> |

**SNPID**=Variant identifier on GRCh37, **EA/OA**=Effect allele / other allele, **EAF**=Effect Allele Frequency, **beta** and **P**=genetic effect coefficient of association and association P-value.

**Supplementary Table S7: Associations of *APOL1* risk variants with eGFR-decline in African American and European ancestry.** While our data was derived primarily from persons of European ancestry, we explored variants in the *APOL1* gene due to previous reports for chronic kidney disease progression in 8,500 African American individuals<sup>S22</sup>. We conducted GWAS with the additive model for eGFR-decline unadjusted for eGFR-baseline restricted to African Americans (n up to 9,038) or to European ancestry (n up to 325,840). Shown are beta-estimates (in mL/min/1.73m<sup>2</sup>), standard errors (SE) and P-values. From 6 previously reported *APOL1* risk variants (the 7<sup>th</sup>, indel rs71785313, not analyzable here), none was associated with eGFR-decline in African American ancestry (P≥0.05). Interestingly, we detected two yet unreported SNPs near/in *APOL1* suggestively associated with eGFR-decline with P=2.8x10<sup>-05</sup> and 3.10x10<sup>-05</sup> in African Americans (effect allele frequency=0.01; monomorphic in European), uncorrelated with the previously reported variants (r<sup>2</sup><0.01).

| SNPID       | EA/OA | EAF  | African American |      |                        | European |        |      |
|-------------|-------|------|------------------|------|------------------------|----------|--------|------|
|             |       |      | Beta             | SE   | P                      | Beta     | SE     | P    |
| rs73885319  | a/g   | 0.77 | 0.001            | 0.05 | 0.98                   | NA       | NA     | NA   |
| rs60910145  | t/g   | 0.78 | 0.002            | 0.05 | 0.97                   | NA       | NA     | NA   |
| rs4821480   | t/g   | 0.37 | -0.011           | 0.04 | 0.78                   | -0.015   | 0.0142 | 0.28 |
| rs2032487   | t/c   | 0.37 | -0.004           | 0.04 | 0.91                   | -0.010   | 0.0131 | 0.45 |
| rs4821481   | t/c   | 0.37 | -0.007           | 0.04 | 0.85                   | -0.001   | 0.0131 | 0.45 |
| rs3752462   | t/c   | 0.73 | 0.027            | 0.04 | 0.51                   | -0.006   | 0.0047 | 0.24 |
| rs114021047 | a/g   | 0.01 | 1.034            | 0.25 | 2.80x10 <sup>-05</sup> | NA       | NA     | NA   |
| rs115045136 | t/c   | 0.01 | 1.027            | 0.25 | 3.10x10 <sup>-05</sup> | NA       | NA     | NA   |

**SNPID**=Variant identifier on GRCh37, **EA/OA**=Effect allele / other allele, **EAF**=Effect Allele Frequency, **beta**, **SE** and **P**=genetic effect coefficient, standard error of association and association P-value.

## SUPPLEMENTARY REFERENCES

- S1. Huffman JE. Examining the current standards for genetic discovery and replication in the era of mega-biobanks. *Nat Commun.* 2018;9(1):5054.
- S2. Skol AD, Scott LJ, Abecasis GR, Boehnke M. Joint analysis is more efficient than replication-based analysis for two-stage genome-wide association studies. *Nat Genet.* 2006;38(2):209-213.
- S3. Coresh J, Turin TC, Matsushita K, et al. Decline in estimated glomerular filtration rate and subsequent risk of end-stage renal disease and mortality. *JAMA - J Am Med Assoc.* 2014;311(24):2518-2531.
- S4. Levey AS, Stevens LA, Schmid CH, et al. A new equation to estimate glomerular filtration rate. *Ann Intern Med.* 2009;150(9):604-612.
- S5. The 1000 Genomes Project Consortium. An integrated map of genetic variation Supplementary Material. *Nature.* 2012;135:1-113.
- S6. McCarthy S, Das S, Kretzschmar W, et al. A reference panel of 64,976 haplotypes for genotype imputation. *Nat Genet.* 2016;48(10):1279-1283.
- S7. Howie BN, Donnelly P, Marchini J. A flexible and accurate genotype imputation method for the next generation of genome-wide association studies. *PLoS Genet.* 2009;5(6):e1000529.
- S8. Fuchsberger C, Abecasis GR, Hinds DA. Minimac2: Faster genotype imputation. *Bioinformatics.* 2015;31(5):782-784.
- S9. Fuchsberger C, Taliun D, Pramstaller PP, Pattaro C. GWAtoolbox: An R package for fast quality control and handling of genome-wide association studies meta-analysis data. *Bioinformatics.* 2012;28(3):444-445.
- S10. Aschard H, Vilhjálmsson BJ, Joshi AD, Price AL, Kraft P. Adjusting for heritable covariates can bias effect estimates in genome-wide association studies. *Am J Hum Genet.* 2015;96(2):329-339.
- S11. Willer CJ, Li Y, Abecasis GR. METAL: Fast and efficient meta-analysis of genomewide association scans. *Bioinformatics.* 2010;26(17):2190-2191.
- S12. Wuttke M, Li Y, Li M, et al. A catalog of genetic loci associated with kidney function from analyses of a million individuals. *Nat Genet.* 2019;51(6):957-972.
- S13. Mägi R, Horikoshi M, Sofer T, et al. Trans-ethnic meta-regression of genome-wide association studies accounting for ancestry increases power for discovery and improves fine-mapping resolution. *Hum Mol Genet.* 2017;26(18):3639-3650.
- S14. Hastie T, Tibshirani R. Varying-Coefficient Models. *J R Stat Soc Ser B.* 1993;55(4):757-779.
- S15. Wood SN. *Generalized Additive Models: An Introduction with R, Second Edition.*; 2017.
- S16. Gorski M, Jung B, Li Y, et al. Meta-analysis uncovers genome-wide significant variants for rapid kidney function decline. *Kidney Int.* 2021;99(4):926-939.
- S17. Wanner C, Krane V, März W, et al. Randomized controlled trial on the efficacy and safety of atorvastatin in patients with type 2 diabetes on hemodialysis (4D study): Demographic and baseline characteristics. *Kidney Blood Press Res.* 2004;27(4):259-266.
- S18. Winkler TW, Günther F, Höllerer S, et al. A joint view on genetic variants for adiposity differentiates subtypes with distinct metabolic implications. *Nat Commun.* 2018;9(1):1946.

- S19. Stanzick KJ, Li Y, Schlosser P, et al. Discovery and prioritization of variants and genes for kidney function in >1.2 million individuals. *Nat Commun.* 2021;12(1):4350.
- S20. Teumer A, Li Y, Ghasemi S, et al. Genome-wide association meta-analyses and fine-mapping elucidate pathways influencing albuminuria. *Nat Commun.* 2019;10(1):4130.
- S21. Mahajan A, Taliun D, Thurner M, et al. Fine-mapping type 2 diabetes loci to single-variant resolution using high-density imputation and islet-specific epigenome maps. *Nat Genet.* 2018;50(11):1505-1513.
- S22. Parsa A, Kao WHL, Xie D, et al. *APOL1* Risk Variants, Race, and Progression of Chronic Kidney Disease. *N Engl J Med.* 2013;369(23):2183-2196.

### **Extended acknowledgements, study funding information and author contributions**

The Deutsche Forschungsgemeinschaft (DFG, German Research Foundation) supported the meta-analysis – Project-ID 387509280 – SFB1350 (Subproject C6 to I.M.H.).

**ADVANCE** ADVANCE genomic sub-studies were supported by grants from the Ministry of Science and Innovation from the Quebec Government, from Genome Quebec, from the Consortium Québécois du Médicament, from the Canadian Institutes of Health Research and from Medpharmgene, OPTITHERA Inc and Les Laboratoires Servier.

**AFTER EU** The AFTER EU study is the Danish part of the EURAGEDIC study which was supported by the European Commission (contract QLG2-CT-2001– 01669). The genotyping for this study was part of the Genetics of Diabetic Nephropathy (GenDN) study, primarily funded by Juvenile Diabetes Research Foundation (JDRF) International Prime Award Number 17-2013- 8. Tarunveer S Ahluwalia was also funded by the GenDN study grant and Lundbeck foundation Travel Grant (Ref. Number 2013-14471).

**AMISH** We thank the Amish research volunteers for their long-standing partnership in research, and the research staff at the Amish Research Clinic for their work and dedication. The Amish contribution was supported by NIH grants R01 AG18728, R01 HL088119, U01 GM074518, U01 HL072515, U01 HL084756, and NIH K12RR023250, and P30 DK072488. Additional support was provided by the University of Maryland General Clinical Research Center, grant M01 RR 16500, the Baltimore Veterans Administration Medical Center Geriatrics Research, and the Paul Beeson Physician Faculty Scholars in Aging Program

**ARIC** The Atherosclerosis Risk in Communities study has been funded in whole or in part with Federal funds from the National Heart, Lung, and Blood Institute, National Institutes of Health, Department of Health and Human Services (contract numbers HHSN268201700001I, HHSN268201700002I, HHSN268201700003I, HHSN268201700004I and HHSN268201700005I), R01HL087641, R01HL086694; National Human Genome Research Institute contract U01HG004402; and National Institutes of Health contract HHSN268200625226C. The authors thank the staff and participants of the ARIC study for their important contributions. Infrastructure was partly supported by Grant Number UL1RR025005, a component of the National Institutes of Health and NIH Roadmap for Medical Research. The work of Anna Köttgen was supported by the Deutsche Forschungsgemeinschaft (DFG, German Research Foundation) – Project-ID 431984000 – SFB 1453, and a DFG Heisenberg Professorship (KO 3598/5-1).

**ASPS** The authors thank the staff and the participants for their valuable contributions. We thank Birgit Reinhart for her long-term administrative commitment, Elfi Hofer for the technical assistance at creating the DNA bank, Ing. Johann Semmler and Anita Harb for DNA sequencing and DNA analyses by TaqMan assays and Irmgard Poelzl for supervising the quality management processes after ISO9001 at the biobanking and

DNA analyses. The research reported in this article was funded by the Austrian Science Fond (FWF) grant number P20545-P05, P13180 and PI904 as well as by the Austrian National Bank (OeNB) Anniversary Fund grant number P15435 and the Austrian Federal Ministry of Science, Research and Economy under the aegis of the EU Joint Programme Neurodegenerative Disease Research (JPND)-www.jpnd.eu. The Medical University of Graz supports the databank of the ASPS.

- AugUR** Age-related diseases: Understanding Genetic and non-genetic influences - a study at the University of Regensburg. Cohort recruiting and management was funded by the Federal Ministry of Education and Research (BMBF-01ER1206, BMBF-01ER1507, to Iris M. Heid) and by the German Research Foundation (DFG HE 3690/7-1, to Iris M. Heid). Genome-wide genotyping and lipid concentrations phenotyping was funded by the University of Regensburg for the Department of Genetic Epidemiology. The computational work supervised by Iris M. Heid was funded by the German Research Foundation (DFG) – Project-ID 387509280 – SFB 1350 (to Iris M. Heid).
- BioMe** The Mount Sinai IPM Biobank Program is supported by The Andrea and Charles Bronfman Philanthropies. Ruth Loos is funded by R01DK110113, U01HG007417, R01DK101855, and R01DK107786.
- CHS** Cardiovascular Health Study: This research was supported by contracts HHSN268201200036C, HHSN268200800007C, HHSN268201800001C, N01HC55222, N01HC85079, N01HC85080, N01HC85081, N01HC85082, N01HC85083, N01HC85086, 75N92021D00006, and grants U01HL080295 and U01HL130114 from the National Heart, Lung, and Blood Institute (NHLBI), with additional contribution from the National Institute of Neurological Disorders and Stroke (NINDS). Additional support was provided by R01AG023629 from the National Institute on Aging (NIA). A full list of principal CHS investigators and institutions can be found at CHS-NHLBI.org. A The provision of genotyping data was supported in part by the National Center for Advancing Translational Sciences, CTSI grant UL1TR001881, and the National Institute of Diabetes and Digestive and Kidney Disease Diabetes Research Center (DRC) grant DK063491 to the Southern California Diabetes Endocrinology Research Center. The content is solely the responsibility of the authors and does not necessarily represent the official views of the National Institutes of Health.
- CILENTO** This study was supported by grants from the Italian Ministry of Universities (PON03PE\_00060\_7, IDF SHARID ARS01\_01270), and the Assessorato Ricerca Regione Campania (POR CAMPANIA 2000/2006 MISURA 3.16). We address special thanks to the populations of Campora, Gioi, and Cardile for their participation in the study. We thank dr. Debora Chirico, dr. Michelina De Cristofaro, dr. Raffaele D’Urso and dr. Giovanni D’Arena for Cilento data collection.
- DECODE** The study was funded by deCODE Genetics/Amgen inc. We thank the study subjects for their valuable participation and our colleagues, who contributed to data collection, sample handling, and genotyping
- DIACORE** Cohort recruiting and management was funded by the KfH Stiftung Präventivmedizin e.V. (Carsten A. Böger). Genome-wide genotyping was funded the Else Kröner-Fresenius-Stiftung (2012\_A147), the KfH Stiftung Präventivmedizin and the University Hospital Regensburg. The Deutsche Forschungsgemeinschaft (DFG, German Research Foundation) supported this work – Project-ID 387509280 – SFB 1350 (Subproject C6 to I.M.H.) and Iris Heid and Carsten Böger received funding by DFG BO 3815/4-1. This project has received funding from the Innovative Medicines Initiative 2 Joint Undertaking under grant agreement No 115974. This Joint Undertaking receives support from the European Union’s Horizon 2020 research and innovation programme and EFPIA with JDRF (BEAT-DKD).

- ESTHER** The ESTHER study was funded by the Saarland state Ministry for Social Affairs, Health, Women and Family Affairs (Saarbrücken, Germany), the Baden-Württemberg state Ministry of Science, Research and Arts (Stuttgart, Germany), the Federal Ministry of Education and Research (Berlin, Germany) and the Federal Ministry of Family Affairs, Senior Citizens, Women and Youth (Berlin, Germany).
- FHS** The Framingham Heart Study is supported by HHSN268201500001.
- FINCAVAS** The Finnish Cardiovascular Study (FINCAVAS) has been financially supported by the Competitive Research Funding of the Tampere University Hospital (Grant 9M048 and 9N035), the Finnish Cultural Foundation, the Finnish Foundation for Cardiovascular Research, the Emil Aaltonen Foundation, Finland, the Tampere Tuberculosis Foundation, EU Horizon 2020 (grant 755320 for TAXINOMISIS; grant 848146 for To\_Aition), and the Academy of Finland grant 322098. The authors thank the staff of the Department of Clinical Physiology for collecting the exercise test data.
- GCKD** The GCKD study was funded by the German Ministry of Research and Education (Bundesministerium für Bildung und Forschung, BMBF), by the Foundation KfH Stiftung Präventivmedizin. Unregistered grants to support the study were provided by Bayer, Fresenius Medical Care and Amgen. Genotyping was supported by Bayer Pharma AG. The work of Matthias Wutke was supported by the Deutsche Forschungsgemeinschaft (DFG, German Research Foundation) Project-ID 431984000 – SFB 1453. The work of Yong Li was supported by DFG KO 3598/4-2.
- GEISINGER** We would like to acknowledge the participants, staff, and our colleagues associated with the Geisinger MyCode Community Health Initiative. We also thank the staff of the PACDC of Geisinger for assistance with the phenotypic data, and the staff of the Biomedical & Translational Informatics and Kidney Health Research Institute
- HANDLS** The authors thank all study participants and the Healthy Aging in Neighborhoods of Diversity across the Life Span (HANDLS) study medical staff for their contributions. The HANDLS study was supported by the Intramural Research Program of the NIH, National Institute on Aging (project # Z01-AG000513 and human subjects protocol number 09-AG-N248). Data analyses for the HANDLS study utilized the high-performance computational resources of the Biowulf Linux cluster at the National Institutes of Health, Bethesda, MD. (<http://biowulf.nih.gov>; <http://hpc.nih.gov>).
- HUNT** The Trøndelag Health Study (The HUNT Study) is a collaboration between HUNT Research Centre (Faculty of Medicine and Health Sciences, NTNU, Norwegian University of Science and Technology), Trøndelag County Council, Central Norway Regional Health Authority, and the Norwegian Institute of Public Health. The HUNT study was approved by the Central Norway Regional Committee for Medical and Health Research Ethics (REC Central no. 2015/1188), and written informed consent was given by all participants.
- HYPERGENES** Funding Source: HYPERGENES project (FP7-HEALTH-F4-2007-201550) and InterOmics (PB05 MIUR-CNR Italian Flagship Project).
- JHS** The Jackson Heart Study (JHS) is supported and conducted in collaboration with Jackson State University (HHSN268201800013I), Tougaloo College (HHSN268201800014I), the Mississippi State Department of Health (HHSN268201800015I/HHSN26800001) and the University of Mississippi Medical Center (HHSN268201800010I, HHSN268201800011I and HHSN268201800012I) contracts from the National Heart, Lung, and Blood Institute (NHLBI) and the National Institute for Minority Health and Health Disparities (NIMHD). The authors also wish to thank the staffs and participants of the JHS. The views expressed in this manuscript are those of the authors and do not necessarily represent the views of the National Heart, Lung, and Blood Institute; the National Institutes of Health; or the U.S. Department of Health and Human Services. Laura M. Raffield is supported by



T32 HL129982 and the National Center for Advancing Translational Sciences, National Institutes of Health, through Grant KL2TR002490.

- J-MICC** We thank Dr. Nobuyuki Hamajima for his work for initiating and organizing the J-MICC Study as the former principal investigator. This study was supported by Grants-in-Aid for Scientific Research for Priority Areas of Cancer (No. 17015018) and Innovative Areas (No. 221S0001) and by the Japan Society for the Promotion of Science (JSPS) KAKENHI Grant (No. 16H06277 [CoBiA]) from the Japanese Ministry of Education, Culture, Sports, Science and Technology. This work was also supported in part by funding for the BioBank Japan Project from the Japan Agency for Medical Research and Development since April 2015, and the Ministry of Education, Culture, Sports, Science and Technology from April 2003 to March 2015.
- KORA** The KORA study was initiated and financed by the Helmholtz Zentrum München – German Research Center for Environmental Health, which is funded by the German Federal Ministry of Education and Research (BMBF) and by the State of Bavaria. Furthermore, KORA research was supported within the Munich Center of Health Sciences (MC-Health), Ludwig-Maximilians-Universität, as part of LMUinnovativ. Statistical KORA analyses were supported by DFG BO-3815/4-1 (to Carsten A. Böger), BMBF 01ER1206, 01ER1507 (to Iris M. Heid), by the University of Regensburg and by the Deutsche Forschungsgemeinschaft (DFG, German Research Foundation) – Project-ID 387509280 – SFB 1350 (Subproject C6 to I.M.H.) and DFG BO 3815/4-1.
- LifeLines** The LifeLines Cohort Study, and generation and management of GWAS genotype data for the LifeLines Cohort Study is supported by the Netherlands Organization of Scientific Research NWO (grant 175.010.2007.006), the Economic Structure Enhancing Fund (FES) of the Dutch government, the Ministry of Economic Affairs, the Ministry of Education, Culture and Science, the Ministry for Health, Welfare and Sports, the Northern Netherlands Collaboration of Provinces (SNN), the Province of Groningen, University Medical Center Groningen, the University of Groningen, Dutch Kidney Foundation and Dutch Diabetes Research Foundation. The authors wish to acknowledge the services of the Lifelines Cohort Study, the contributing research centers delivering data to Lifelines, and all the study participants.
- MDC-CC** This study was supported by the European Research Council (Consolidator grant nr 649021, Orho-Melander), the Swedish Research Council, the Swedish Heart and Lung Foundation, the Novo Nordic Foundation, the Swedish Diabetes Foundation, and the Pålsson Foundation, and by equipment grants from the Knut and Alice Wallenberg Foundation, the Region Skåne, Skåne University Hospital, the Linneus Foundation for the Lund University Diabetes Center and Swedish Foundation for Strategic Research for IRC15-0067.
- MESA** MESA and the MESA SHARe projects are conducted and supported by the National Heart, Lung, and Blood Institute (NHLBI) in collaboration with MESA investigators. Support for MESA is provided by contracts 75N92020D00001, HHSN268201500003I, N01-HC-95159, 75N92020D00005, N01-HC-95160, 75N92020D00002, N01-HC-95161, 75N92020D00003, N01-HC-95162, 75N92020D00006, N01-HC-95163, 75N92020D00004, N01-HC-95164, 75N92020D00007, N01-HC-95165, N01-HC-95166, N01-HC-95167, N01-HC-95168, N01-HC-95169, UL1-TR-000040, UL1-TR-001079, and UL1-TR-001420. Also supported by the National Center for Advancing Translational Sciences, CTSI grant UL1TR001881, and the National Institute of Diabetes and Digestive and Kidney Disease Diabetes Research Center (DRC) grant DK063491 to the Southern California Diabetes Endocrinology Research Center.
- METSIM** Funding Source: HYPERGENES project (FP7-HEALTH-F4-2007-201550) and InterOmics (PB05 MIUR-CNR Italian Flagship Project).

- MGI** The authors acknowledge the Michigan Genomics Initiative participants, Precision Health at the University of Michigan, the University of Michigan Medical School Central Biorepository, and the University of Michigan Advanced Genomics Core for providing data and specimen storage, management, processing, and distribution services, and the Center for Statistical Genetics in the Department of Biostatistics at the School of Public Health for genotype data curation, imputation, and management in support of the research reported in this publication. Funding was provided by the NIH (R35-HL135824).
- NESDA** Funding was obtained from the Netherlands Organization for Scientific Research (Geestkracht program grant 10-000-1002); the Center for Medical Systems Biology (CSMB, NWO Genomics), Biobanking and Biomolecular Resources Research Infrastructure (BBMRI-NL), VU University's Institutes for Health and Care Research (EMGO+) and Neuroscience Campus Amsterdam, University Medical Center Groningen, Leiden University Medical Center, National Institutes of Health (NIH, R01D0042157-01A, MH081802, Grand Opportunity grants 1RC2 MH089951 and 1RC2 MH089995). Part of the genotyping and analyses were funded by the Genetic Association Information Network (GAIN) of the Foundation for the National Institutes of Health. Computing was supported by BiG Grid, the Dutch e-Science Grid, which is financially supported by NWO.
- OGP** The Ogliastra Genetic Park study was supported by grant from the Italian Ministry of Education, University and Research (MIUR) no. 5571/DSPAR/2002. We thank all study participants for their contributions and the municipal administrations for their economic and logistic support.
- PIVUS** The PIVUS study was supported by Wellcome Trust grants WT098017, WT064890, WT090532, Uppsala University, Uppsala University Hospital, the Swedish Research Council and the Swedish Heart-Lung Foundation. Cecilia M. Lindgren is supported by the Li Ka Shing Foundation, NIHR Oxford Biomedical Research Centre, Oxford, NIH (1P50HD104224-01), Gates Foundation (INV-024200), and a Wellcome Trust Investigator Award (221782/Z/20/Z).
- POPGEN** The PopGen 2.0 network was supported by a grant from the German Ministry for Education and Research (01EY1103). Sandra Freitag-Wolf was supported by German Research Foundation, Clusters of Excellence 306, Inflammation at Interfaces.
- PREVEND** The Prevention of Renal and Vascular Endstage Disease Study (PREVEND) genetics is supported by the Dutch Kidney Foundation (Grant E033), the EU project grant GENEASURE (FP-6 LSHM CT 2006 037697), the National Institutes of Health (grant LM010098), the Netherlands organization for health research and development (NWO VENI grant 916.761.70), and the Dutch Inter University Cardiology Institute Netherlands (ICIN). Niek Verweij was supported by NWO VENI grant 016.186.125.
- RS** The Rotterdam Study (RS) has been approved by the Medical Ethics Committee of the Erasmus MC (registration number MEC 02.1015) and by the Dutch Ministry of Health, Welfare and Sport (Population Screening Act WBO, license number 1071272-159521-PG). The RS has been entered into the Netherlands National Trial Register (NTR; [www.trialregister.nl](http://www.trialregister.nl)) and into the WHO International Clinical Trials Registry Platform (ICTRP; [www.who.int/ictrp/network/primary/en/](http://www.who.int/ictrp/network/primary/en/)) under shared catalogue number NTR6831. All participants provided written informed consent to participate in the study and to have their information obtained from treating physicians. The generation and management of GWAS genotype data for the RS (RS I, RS II, RS III) was executed by the Human Genotyping Facility of the Genetic Laboratory of the Department of Internal Medicine, Erasmus MC, Rotterdam, the Netherlands. The GWAS datasets are supported by the Netherlands Organisation of Scientific Research NWO Investments (nr. 175.010.2005.011, 911-03-012), the

Genetic Laboratory of the Department of Internal Medicine, Erasmus MC, the Research Institute for Diseases in the Elderly (014-93-015; RIDE2), the Netherlands Genomics Initiative (NGI)/Netherlands Organisation for Scientific Research (NWO) Netherlands Consortium for Healthy Aging (NCHA), project nr. 050-060- 810. We thank Pascal Arp, Mila Jhamai, Marijn Verkerk, Lizbeth Herrera and Marjolein Peters, and Carolina Medina-Gomez, for their help in creating the GWAS database, and Karol Estrada, Yurii Aulchenko, and Carolina Medina-Gomez, for the creation and analysis of imputed data. The RS is funded by Erasmus Medical Center and Erasmus University, Rotterdam, Netherlands Organization for the Health Research and Development (ZonMw), the Research Institute for Diseases in the Elderly (RIDE), the Ministry of Education, Culture and Science, the Ministry for Health, Welfare and Sports, the European Commission (DG XII), and the Municipality of Rotterdam. The authors are grateful to the study participants, the staff from the RS and the participating general practitioners and pharmacists.

- SHIP** SHIP is part of the Community Medicine Research net of the University of Greifswald, Germany, which is funded by the Federal Ministry of Education and Research (grants no. 01ZZ9603, 01ZZ0103, and 01ZZ0403), the Ministry of Cultural Affairs as well as the Social Ministry of the Federal State of Mecklenburg-West Pomerania, and the network 'Greifswald Approach to Individualized Medicine (GANI\_MED)' funded by the Federal Ministry of Education and Research (grant 03IS2061A). Genome-wide data have been supported by the Federal Ministry of Education and Research (grant no. 03ZIK012) and a joint grant from Siemens Healthineers, Erlangen, Germany and the Federal State of Mecklenburg- West Pomerania. The University of Greifswald is a member of the Caché Campus program of the InterSystems GmbH.
- SiMES** The Singapore Malay Eye Study (SiMES) was funded by the National Medical Research Council (NMRC 0796/2003 and NMRC/STaR/0003/2008) and Biomedical Research Council (BMRC, 09/1/35/19/616). The Genome Institute of Singapore provided services for genotyping.
- SINDI** The Singapore Indian Eye Study (SINDI) was funded by grants from the Biomedical Research Council of Singapore (BMRC 09/1/35/19/616 and 08/1/35/19/550), and the National Medical Research Council of Singapore (NMRC/STaR/0003/2008). The Genome Institute of Singapore provided services for genotyping.
- SOLID-TIMI 52** The SOLID-TIMI 52 trial was supported and funded by grants from GlaxoSmithKline.
- STABILITY** The STABILITY trial was supported and funded by grants from GlaxoSmithKline.
- UK Biobank** This research has been conducted using the UK Biobank resource under application number 20272.
- ULSAM** The ULSAM study was supported by Wellcome Trust grants WT098017, WT064890, WT090532, Uppsala University, Uppsala University Hospital, the Swedish Research Council and the Swedish Heart-Lung Foundation. Johan Ärnlöv was supported by The Swedish Research Council, and the Swedish Heart-Lung Foundation.
- Vanderbilt** The data used for the analyses were obtained from Vanderbilt University Medical Center's BioVU, which is supported by numerous sources: institutional funding, private agencies, and federal grants. These include the NIH funded Shared Instrumentation Grant S10RR025141; and CTSA grants UL1TR002243, UL1TR000445, and UL1RR024975. Genomic data are also supported by investigator-led projects that include U01HG004798, R01NS032830, RC2GM092618, P50GM115305, U01HG006378, U19HL065962, R01HD074711; and additional funding sources listed at <https://victr.vanderbilt.edu/pub/biovu/>. Jacklyn N. Hellwege is supported by the Vanderbilt Molecular and Genetic Epidemiology of Cancer training program, funded by T32CA160056.

**YFS** The Young Finns Study has been financially supported by the Academy of Finland: grants 322098, 286284, 134309 (Eye), 126925, 121584, 124282, 129378 (Salve), 117787 (Gendi), and 41071 (Skidi); the Social Insurance Institution of Finland; Competitive State Research Financing of the Expert Responsibility area of Kuopio, Tampere and Turku University Hospitals (grant X51001); Juho Vainio Foundation; Paavo Nurmi Foundation; Finnish Foundation for Cardiovascular Research; Finnish Cultural Foundation; The Sigrid Juselius Foundation; Tampere Tuberculosis Foundation; Emil Aaltonen Foundation; Yrjö Jahnsson Foundation; Signe and Ane Gyllenberg Foundation; Diabetes Research Foundation of Finnish Diabetes Association; EU Horizon 2020 (grant 755320 for TAXINOMISIS; grant 848146 for To\_Aition); European Research Council (grant 742927 for MULTIEPIGEN project); Tampere University Hospital Supporting Foundation and Finnish Society of Clinical Chemistry. We thank the teams that collected data at all measurement time points; the persons who participated as both children and adults in these longitudinal studies; and biostatisticians Irina Lisinen, Johanna Ikonen, Noora Kartiosuo, Ville Aalto, and Jarno Kankaanranta for data management and statistical advice.

**Meta-analysis** German Research Foundation (Project-ID 387509280, SFB1350, Subproject C6 to I.M.H.), computing resources by University of Regensburg.

### LifeLines group author genetics

LifeLines Cohort Study: Behrooz Z Alizadeh (1), H Marika Boezen (1), Lude Franke (2), Pim van der Harst (3), Gerjan Navis (4), Marianne Rots (5), Harold Snieder (1), Morris Swertz (2), Bruce HR Wolffenbuttel (6), Cisca Wijmenga (2)

- (1) *Department of Epidemiology, University of Groningen, University Medical Center Groningen, The Netherlands*
- (2) *Department of Genetics, University of Groningen, University Medical Center Groningen, The Netherlands*
- (3) *Department of Cardiology, University of Groningen, University Medical Center Groningen, The Netherlands*
- (4) *Department of Internal Medicine, Division of Nephrology, University of Groningen, University Medical Center Groningen, The Netherlands*
- (5) *Department of Pathology and Medical Biology, University of Groningen, University Medical Center Groningen, The Netherlands*
- (6) *Department of Endocrinology, University of Groningen, University Medical Center Groningen, The Netherlands*

### Author contributions

MG, HR, AT, PM, CAB, TB, CP, AK, FK and IMH **wrote the manuscript**. MG, HR, AT, MWu, CAB, AK, and CP **designed the study**. GS, MSc, BOT, TSA, JÄ, SJLB, BBa, BBr, GB, MB, EB, HB, RJC, JChal, CC, MCi, JCo, MHdB, KEc, ME, CF, RTG, VG, CG, DG, SHa, PH, AHi, KeH, BH, HH, KHv, MAI, BJ, MKä, CK, WKo, HKr, BKK, JK, MLa, TL, LL, RJFL, MAL, OM, YM, AMo, GNN, MNai, MLO, MO, AP, SAP, BWJHP, MP, BMP, OTR, RRe, MR, PR, CSa, HSc, RS, BS, MSi, HSn, KStar, KStef, HSto, KStr, HStr, PS, PvdH, UV, KW, LWal, DMW, HW, CW, TWo, MW, QY, MZ, UT, CAB, AK, FK, CP **managed an individual contributing study**. MG, HR, AT, SGr, FG, MWu, TW, YL, GS, JChai, AC, MCo, MF, AHo, KHo, MLi, MSc, BOT, ATi, JW, TSA, PA, MLBig, GB, RJC, JFC, JChal, MLiC, JC, SF, MGh, SGh, DG, PH, EH, SHw, NSJ, BJ, IK, CK, HKr, BK, LAL, LLY, AMa, PPM, NM, AMo, MNak, MN, BN, IMN, TN, JO, AP, SAP, MHP, LMR, MR, KMR, DR, KR, CSc, SSe, KBS, XS, KStan, KStar, SSz, CHLT, LT, JTr, PvdH, PJvdM, NV, MW, QY, LMY, CAB, AK, CP and IMH **performed statistical methods**

**and analysis.** MG, HR, SGr, MWu, TW, YL, GS, AC, MCo, AHo, KHo, MLi, MSc, JW, TSA, PA, RJC, FD, AF, PG, SGh, DG, PH, EH, NSJ, CK, LLy, YM, PPM, MNak, TN, JO, AP, SAP, MHP, KR, CSc, SSe, CMS, KBS, KStan, KStar, SSz, LT, JTr, PJvdM, SW, LMY, CAB and IMH **performed bioinformatics.** MG, LWal, HW, MW, LMY, UT, CAB, AK, CP and IMH **interpreted results.** AT, MF, JÄ, EB, CC, JC, AF, RTG, VG, PH, KHv, MKä, CK, WKo, BKK, MLa, LAL, TL, LL, LLy, TM, OM, YM, NM, AMo, JcM, MO, BWJHP, MHP, OTR, JIR, MSi, KStar, KDT, JTr, SV, PvdH, UV, KW, MWa, CAB and FK **performed genotyping.** MG, HR, AT, SGr, PM, FG, MWu, TW, YL, TB, GS, JChai, AC, MCo, MF, AHo, KHo, MLi, MSc, BOT, ATi, JW, TSA, PA, JÄ, BOA, SJLB, BBa, BBr,NB, MLBig, GB, MB, EB, EPB, HB, RJC, JFC, LC, JChal, MLiC, MLingC, CC, MCi, JC, JCo, DC, MHdB, FD, KEc, KEn, ME, AF, SF, CF, PG, RTG, MGh, SGh, VG, CG, DG, SHa, PH, AHi, KeH, EH, BH, HH, NH, KHv, SHw, MAI, NSJ, BJ, MKä, IK, CK, WKo, HKr, BKK, BK, JK, MLa, LAL, TL, WL, Lcs, LL, CL, RJFL, MAL, LLy, AMa, CM, TM, OM, YM, PPM, NM, AMo, JcM, GNN, MNai, MNak, MNal, MN, KN, BN, IMN, TN, MLO, JO, IO, MO, AP, SAP, BWJHP, MP, MHP, BMP, LMR, OTR, RRe, MR, KMR, FR, ARR, PR, JIR, DR, KR, CSa, ES, HSc, RS, BS, CSc, SSe, CMS, KBS, XS, MSi, HSn, KStan, KStar, KStef, HSto, KStr, HStr, PS, SSz, KDT, CHLT, LT, JTr, SV, PvdH, PJvdM, NV, UV, KW, MWa, LWal, SW, DMW, HW, CW, TWo, MW, QY, LMY, MZ, AZ, UT, CAB, AK, FK, CP and IMH **critically reviewed the manuscript.** EPB, HB, JChal, MLingC, CC, MCi, JCo, KEc, RTG, VG, PH, AHi, HH, NH, KHv, BJ, MKä, BKK, MLa, TL, WL, LL, CM, MNai, KN, MLO, IO, SAP, BWJHP, OTR, MR, ARR, PR, RS, MSi, KStar, KStef, SV, KW, LWal, HW, TWo, MW, MZ, UT, CAB, AK and CP **recruited subjects.**
